# Supplementary material for: Control of electronic and exchange coupling by bridge substituents in donor acceptor triads with triptycene bridges
Source: Royal Society of Chemistry journal article supplement (doi:10.1039/d4cp03148b), 2024-01-01
Supplement: d4cp03148b1.pdf [file d4cp03148b1.pdf]

## Supporting Information

# Control of Electronic and Exchange Coupling by Bridge Substituents in Donor Acceptor Triads with Triptycene Bridges

**Christoph Lambert,<sup>a,d\*</sup> Chantal Roger,<sup>a</sup> Alexander Schmiedel,<sup>a</sup> Marco Holzapfel,<sup>a</sup> Nikita Lukzen,<sup>b</sup> and Ulrich E. Steiner<sup>c\*</sup>**

<sup>a</sup>Institut für Organische Chemie, Universität Würzburg, Am Hubland, D-97074 Würzburg, Germany.

<sup>b</sup>International Tomography Center, Russia and Novosibirsk State University; Institutskaya 3a, Novosibirsk, Novosibirsk 630090, Russia

<sup>c</sup>Department of Chemistry, University of Konstanz, Universitätsstraße 10; 78464 Konstanz, Germany

<sup>d</sup>Center for Nanosystems Chemistry, Universität Würzburg, Theodor-Boveri-Weg, D-97074 Würzburg, Germany

## Contents

|                                                      |           |
|------------------------------------------------------|-----------|
| <b>1. Synthesis</b> .....                            | <b>3</b>  |
| 1.1. General.....                                    | 3         |
| 1.2. Nuclear Magnetic Resonance Spectroscopy .....   | 3         |
| 1.3. Mass Spectrometry .....                         | 3         |
| 1.4. Synthetic procedures .....                      | 5         |
| 1.5. NMR spectra of all triads and precursors.....   | 32        |
| <b>2. Cyclic voltammetry</b> .....                   | <b>55</b> |
| <b>3. Weller-Approach and DFT computations</b> ..... | <b>56</b> |

|                                                                             |           |
|-----------------------------------------------------------------------------|-----------|
| <b>4. Steady-state absorption spectroscopy .....</b>                        | <b>59</b> |
| <b>5. Steady-state emission spectroscopy .....</b>                          | <b>61</b> |
| <b>6. Transient absorption spectroscopy.....</b>                            | <b>62</b> |
| <b>6.1. fs-transient absorption spectroscopy .....</b>                      | <b>62</b> |
| <b>6.2. Target fits.....</b>                                                | <b>64</b> |
| <b>6.3. ns-transient absorption spectroscopy .....</b>                      | <b>66</b> |
| <b>7. Error limits for <math>k_s</math>.....</b>                            | <b>71</b> |
| <b>8. Necessity to adapt the effective hyperfine coupling constant.....</b> | <b>72</b> |
| <b>9. Pure <math>J</math>-effect on <math>k(B)</math> spectra.....</b>      | <b>74</b> |

# 1. Synthesis

## 1.1. General

Commercially available compounds and standard solvents were purchased from either Acros, Chempur, Fluka, Honeywell, Merck or TCI and used without further purification. DCM, ethyl acetate and hexane were distilled prior to usage. All moisture and oxygen sensitive reactions were performed under a nitrogen atmosphere (dried with Sicapent® from Merck and deoxygenated by a copper oxide catalyst R3-11 from BASF) using dry solvents obtained by a solvent purification system from Inert and degassed in a gentle stream of nitrogen for at least 10 min. Thin layer chromatography (TLC) was performed on pre-coated TLC sheets ALUGRAMR Xtra SIL G/UV254 from Macherey Nagel.

## 1.2. Nuclear Magnetic Resonance Spectroscopy

The measurements of all NMR spectra were done using either a Bruker Avance III HD 400 FT-Spectrometer ( $^1\text{H}$ : 400.13 MHz,  $^{13}\text{C}$ : 100.61 MHz), with a Bruker Ultrashield Magnet, a Bruker Avance III HD 400 FT-Spectrometer ( $^1\text{H}$ : 400.03 MHz,  $^{13}\text{C}$ : 100.59 MHz), with a Bruker Ascend Magnet, or a Bruker Avance III HD 600 FT-Spectrometer ( $^1\text{H}$ : 600.13 MHz,  $^{13}\text{C}$ : 150.90 MHz) equipped with a cryoprobe unit. Chemical shifts are referenced to the residual proton signal of the respective deuterated solvents ( $^1\text{H}$ ) or to the signal of the present  $^{13}\text{C}$  isotope and are given in ppm ( $\delta$ -scale). The proton signals and their coupling patterns are given as follows: s (singlet), d (doublet), dd (doublet of doublets), m (multiplet), AA' / BB' (chemically but not magnetically equivalent protons), m' (overlapping signals of chemically non-equivalent protons that could not be assigned to first-order couplings). The carbon signals are given as: Cq (quaternary), CH (tertiary), CH<sub>3</sub> (primary).

## 1.3. Mass Spectrometry

A Bruker Daltonic microTOF focus (ESI, APCI) or a Bruker Daltonics UltrafleXtreme (MALDI) were used to record the mass spectra. For MALDI spectra DCTB (trans-2-[3-(4-*tert*-butylphenyl)-2-methyl-2-propenylidene]malononitrile) was used as a matrix. The software Bruker Daltonics Isotope Pattern was used to calculate the respective theoretical masses. The given measured mass refers to the 100 % peak calculated by the software.

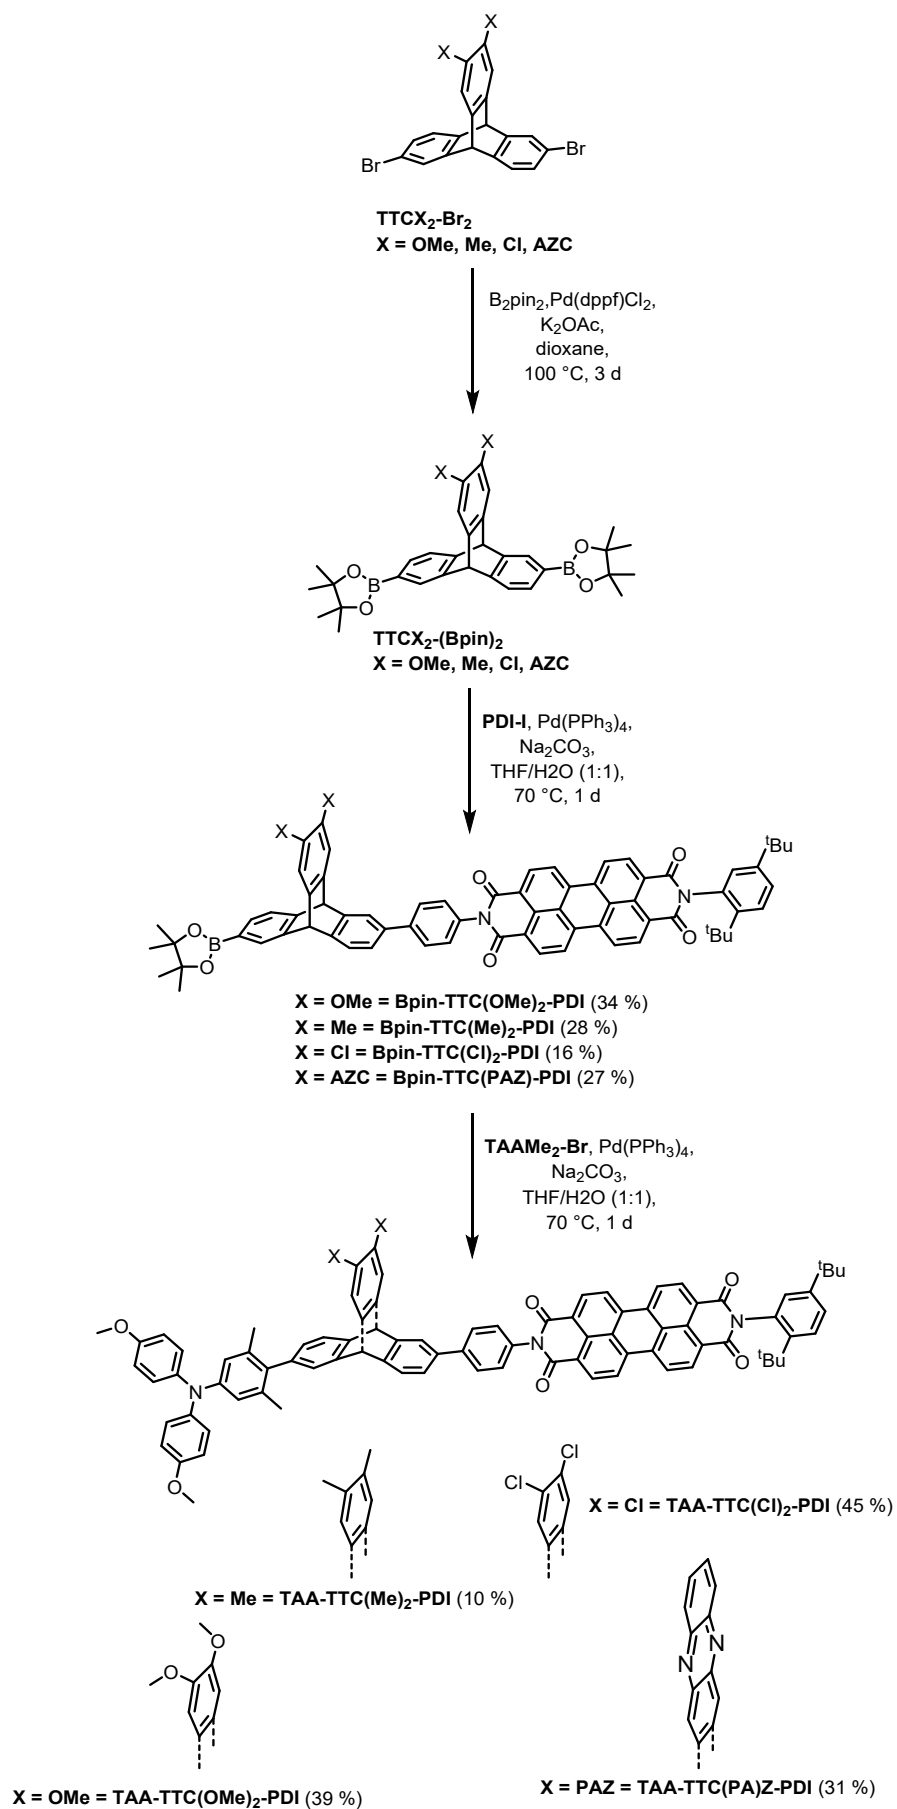

**Scheme S1:** Synthetic route for the triads.



## 1.4. Synthetic procedures

The synthesis of the TAA donor, the PDI acceptor and of the unsubstituted triad is described in reference.<sup>[1]</sup>

### General procedure for the synthesis of the triptycene bridging units (GP I)

2,6-Dibromoanthracene (1 eq.) was dissolved in dioxane and heated to 120 °C. The appropriate anthranilic acid derivative (2-4 eq.) was dissolved in dioxane / THF (v:v; 1:1) and added to the anthracene solution via syringe pump over 6 h. Isoamyl nitrite (20 eq.) was added dropwise simultaneously to the reaction mixture. After complete addition, the mixture was stirred at 120 °C for another 30 min and afterwards cooled to rt. The solvent was removed under reduced pressure and the product was separated from the reactant by washing the solid with hexanes/DCM (v:v 20:1 – 10:1). The crude product was purified by column chromatography on silica gel.<sup>[2-3]</sup>

### General procedure for the *Suzuki-Miyaura* borylation (GP II)

The appropriate triptycene derivative (1 eq.), bis(pinacolato)diboron (2.5 eq.), Pd(dppf)Cl<sub>2</sub> (5 mol%) and potassium acetate (4 eq.) were dissolved in dioxane under inert gas atmosphere. After heating the reaction mixture to 100 °C for 3 d the solvent was removed under reduced pressure and the residue was dissolved in DCM. The organic phase was washed with water and dried over Na<sub>2</sub>SO<sub>4</sub>. The solvent was removed under reduced pressure and the crude product was purified by column chromatography on silica gel.<sup>[4]</sup>

### General procedure for the *Suzuki-Coupling* reaction (GP III)

The appropriate borylated species (1 eq), the halogenated species (varying eq.) and sodium carbonate (4 eq) were dissolved in a mixture of THF and degassed water (v:v 4:1) under an inert gas atmosphere. Afterwards Pd(PPh<sub>3</sub>)<sub>4</sub> (5 mol%) was added and the reaction mixture was heated to 70 °C for 12 h. The solvent was removed under reduced pressure, the residue dissolved in DCM and the organic layer washed with water. The aqueous phases were extracted with DCM and the combined organic phases were dried over Na<sub>2</sub>SO<sub>4</sub>. The solvent was removed under reduced pressure and the crude product was purified by column chromatography on silica gel.

## 2,6-Dibromo-14,15-dimethoxytryptycene (TTC(OMe)<sub>2</sub>-Br<sub>2</sub>)

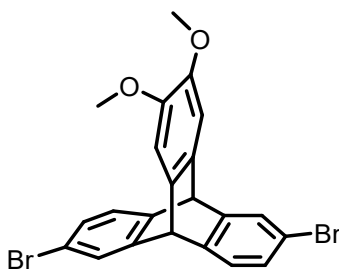

CA: [-]

Synthesis according to **GP I**. [2-3]

2,6-Dibromoanthracene (1.00 g, 2.98 mmol) in dry dioxane (70 ml). 4,5-Dimethoxyanthranilic acid (2.35 g, 11.9 mmol) in dry THF (20 ml) and dry dioxane (20 ml). Isoamyl nitrite (7.00 ml, 52.0 mmol). Column chromatography (silica gel, eluent: hexanes/DCM 1:1, hexanes/EA 5:1).

**Yield:** 323 mg (684  $\mu$ mol, 23 %) of a colourless solid.

C<sub>22</sub>H<sub>16</sub>Br<sub>2</sub>O<sub>2</sub> [472.17 g/mol]

**<sup>1</sup>H-NMR** (400.1 MHz, CDCl<sub>3</sub>):

$\delta$  [ppm] = 7.51 (d, <sup>4</sup>J<sub>H,H</sub> = 1.9 Hz, 2H), 7.22 (d, <sup>3</sup>J<sub>H,H</sub> = 7.8 Hz, 2H), 7.12 (dd, <sup>3</sup>J<sub>H,H</sub> = 7.8 Hz, <sup>4</sup>J<sub>H,H</sub> = 1.9 Hz, 2H), 7.00 (s, 2H), 5.27 (s, 2H), 3.84 (s, 6H).

**<sup>13</sup>C-NMR** (100.6 MHz, CDCl<sub>3</sub>):

$\delta$  [ppm] = 147.7 (C<sub>q</sub>), 146.5 (C<sub>q</sub>), 144.3 (C<sub>q</sub>), 136.8 (C<sub>q</sub>), 128.1 (CH), 126.6 (CH), 125.0 (CH), 118.8 (C<sub>q</sub>), 108.7 (CH), 56.3 (CH<sub>3</sub>), 52.9 (CH).

**APCI-MS:** m / z: calc. [M+H]<sup>+</sup> 472.95707; found [M+H]<sup>+</sup> 472.95608,  $\Delta$  = 2.09 ppm.

## TTC(OMe)<sub>2</sub>-(Bpin)<sub>2</sub>

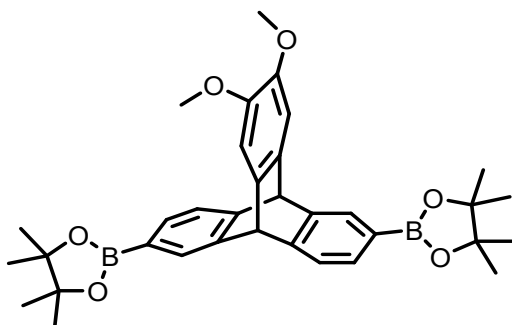

CA: [-]

Synthesis according to **GP II**.<sup>[4]</sup>

**TTC(OMe)<sub>2</sub>-Br<sub>2</sub>** (1.16 g, 2.46 mmol), bis(pinacolato)diboron (1.56 g, 6.14 mmol), Pd(dppf)Cl<sub>2</sub> (100 mg, 137 μmol), potassium acetate (964 mg, 9.83 mmol) in dry dioxane (30 ml) 3 d, 80 °C  
Column chromatography (silica gel, eluent: EA/hexanes 1:4).

**Yield:** 902 mg (1.59 mmol, 65 %) of a colourless solid.

C<sub>34</sub>H<sub>40</sub>B<sub>2</sub>O<sub>6</sub> [566.30 g/mol].

**<sup>1</sup>H-NMR** (400.1 MHz, CDCl<sub>3</sub>):

δ [ppm] = 7.81 (s, 2H), 7.47 (dd, <sup>3</sup>J<sub>H,H</sub> = 7.3 Hz, <sup>4</sup>J<sub>H,H</sub> = 1.1 Hz, 2H), 7.35 (d, <sup>3</sup>J<sub>H,H</sub> = 7.3 Hz, 2H), 6.97 (s, 2H), 5.37 (s, 2H), 3.81 (s, 6H), 1.29 (s, 24H).

**<sup>13</sup>C-NMR** (100.6 MHz, CDCl<sub>3</sub>):

δ [ppm] = 149.0 (C<sub>q</sub>), 146.1 (C<sub>q</sub>), 144.7 (C<sub>q</sub>), 137.6 (C<sub>q</sub>), 132.4 (CH), 129.3 (CH), 123.0 (CH), 108.6 (CH), 83.8 (C<sub>q</sub>), 56.3 (CH<sub>3</sub>), 53.9 (CH), 24.9 (CH<sub>3</sub>).<sup>1</sup>

**APCI-MS:** m / z: calc. [M+H]<sup>+</sup> 567.3095; found [M+H]<sup>+</sup> 567.3099.

<sup>1</sup> The C atom next to the Bpin group is not visible.

## 2,6-Dibromo-14,15-dimethyltritycene (TTCMe<sub>2</sub>-Br<sub>2</sub>)

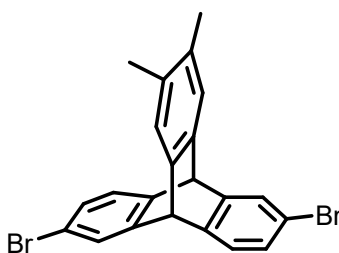

CA: [-]

Synthesis according to **GP I**.<sup>[2-3]</sup>

2,6-Dibromoanthracene (1.00 g, 2.98 mmol) in dry dioxane (20 ml). 4,5-Dimethylantranilic acid (1.48 g, 8.96 mmol) in dry THF (20 ml) and dry dioxane (30 ml). Isoamyl nitrite (9.21 ml, 68.4 mmol). Column chromatography (silica gel, eluent: DCM, hexanes/toluene 100:6).

**Yield:** 420 mg (954  $\mu$ mol, 32 %) of a colourless solid.

C<sub>22</sub>H<sub>16</sub>Br<sub>2</sub> [440.17 g/mol]

**<sup>1</sup>H-NMR** (400.1 MHz, CDCl<sub>3</sub>):

$\delta$  [ppm] = 7.50 (d, <sup>4</sup>J<sub>H,H</sub> = 2.0 Hz, 2H), 7.22 (d, <sup>3</sup>J<sub>H,H</sub> = 7.9 Hz, 2H), 7.18 (s, 2H), 7.12 (dd, <sup>3</sup>J<sub>H,H</sub> = 7.9 Hz, <sup>4</sup>J<sub>H,H</sub> = 2.0 Hz, 2H), 5.28 (s, 2H), 2.17 (s, 6H).

**<sup>13</sup>C-NMR** (100.6 MHz, CDCl<sub>3</sub>):

$\delta$  [ppm] = 147.5 (C<sub>q</sub>), 144.1 (C<sub>q</sub>), 141.8 (C<sub>q</sub>), 133.8 (C<sub>q</sub>), 128.2 (CH), 126.9 (CH), 125.4 (CH), 125.2 (CH), 118.9 (C<sub>q</sub>), 52.8 (CH), 19.7 (CH<sub>3</sub>).

**APCI-HRMS:** m / z: calc. [M+H]<sup>+</sup> 440.96723; found [M+H]<sup>+</sup> 440.96804,  $\Delta$  = 1.84 ppm.

## TTCMe<sub>2</sub>-(Bpin)<sub>2</sub>

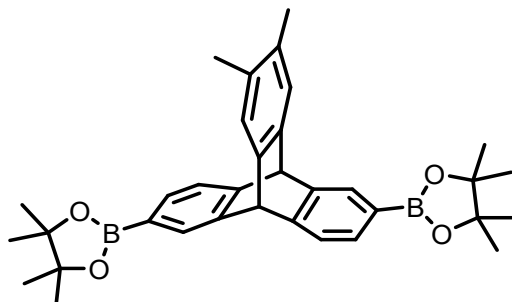

CA: [-]

Synthesis according to **GP II**.<sup>[4]</sup>

**TTCMe<sub>2</sub>-Br<sub>2</sub>** (900 mg, 2.04 mmol), bis(pinacolato)diboron (1.25 g, 4.92 mmol), Pd(dppf)Cl<sub>2</sub> (83.5 mg, 114 μmol), potassium acetate (803 mg, 8.18 mmol) in dry dioxane (50 ml) 3 d, 80 °C  
Column chromatography (silica gel, eluent: DCM/hexanes 9:1).

**Yield:** 484 mg (906 μmol, 44 %) of a colourless solid.

C<sub>34</sub>H<sub>40</sub>B<sub>2</sub>O<sub>4</sub> [534.30 g/mol].

**<sup>1</sup>H-NMR** (400.1 MHz, CDCl<sub>3</sub>):

δ [ppm] = 7.78 (s, 2H), 7.44 (dd, <sup>3</sup>J<sub>H,H</sub> = 7.2 Hz, <sup>4</sup>J<sub>H,H</sub> = 1.1 Hz, 2H), 7.33 (d, <sup>3</sup>J<sub>H,H</sub> = 7.2 Hz, 2H), 7.12 (s, 2H), 5.36 (s, 2H), 2.12 (s, 6H), 1.28 (s, 24H).

**<sup>13</sup>C-NMR** (100.6 MHz, CDCl<sub>3</sub>):

δ [ppm] = 148.9 (C<sub>q</sub>), 144.6 (C<sub>q</sub>), 142.5 (C<sub>q</sub>), 133.1 (C<sub>q</sub>), 132.4 (CH), 129.5 (CH), 125.3 (CH), 123.1 (CH), 83.7 (C<sub>q</sub>), 53.8 (CH), 24.95 (CH<sub>3</sub>), 24.90 (CH<sub>3</sub>), 19.6 (CH<sub>3</sub>).<sup>2</sup>

**APCI-MS:** m / z: calc. [M+H]<sup>+</sup> 535.3197; found [M+H]<sup>+</sup> 535.3197.

<sup>2</sup> The C atom next to the Bpin group is not visible.

## 2,6-Dibromo-14,15-dichlorotriptycene (TTCCl<sub>2</sub>-Br<sub>2</sub>)

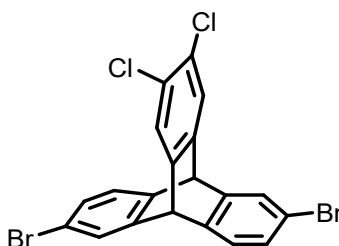

CA: [-]

Synthesis according to **GP I**.<sup>[2-3]</sup>

2,6-Dibromoanthracene (1.00 g, 2.98 mmol) in dry dioxane (70 ml). 4,5-Dichloroanthranilic acid (1.23 g, 5.97 mmol) in dry THF (20 ml) and dry dioxane (20 ml), Isoamyl nitrite (6.00 ml, 44.6 mmol). Column chromatography (silica gel, hexanes/DCM 1:1, hexanes/tol 100:3).

**Yield:** 516 mg (1.07 mmol, 36 %) of a colourless solid.

C<sub>20</sub>H<sub>10</sub>Br<sub>2</sub>Cl<sub>2</sub> [481.01 g/mol]

**<sup>1</sup>H-NMR** (400.1 MHz, CDCl<sub>3</sub>):

δ [ppm] = 7.51 (d, <sup>4</sup>J<sub>H,H</sub> = 1.9 Hz, 2H), 7.43 (s, 2H), 7.23 (d, <sup>3</sup>J<sub>H,H</sub> = 7.9 Hz, 2H), 7.17 (dd, <sup>3</sup>J<sub>H,H</sub> = 7.8 Hz, <sup>4</sup>J<sub>H,H</sub> = 1.9 Hz, 2H), 5.28 (s, 2H).

**<sup>13</sup>C-NMR** (100.6 MHz, CDCl<sub>3</sub>):

δ [ppm] = 146.6 (C<sub>q</sub>), 144.2 (C<sub>q</sub>), 142.7 (C<sub>q</sub>), 129.2 (C<sub>q</sub>), 128.8 (CH), 127.3 (CH), 125.9 (CH), 125.3 (CH), 119.4 (C<sub>q</sub>), 52.5 (CH).

**APCI-MS:** m / z: calc. [M]<sup>+</sup> 479.8499; found [M]<sup>+</sup> 479.8507.

## TTCCl<sub>2</sub>-(Bpin)<sub>2</sub>

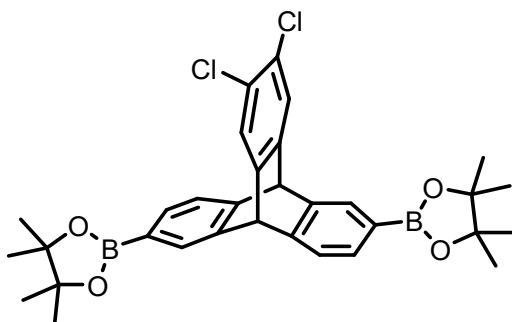

CA: [-]

Synthesis according to **GP II**.<sup>[4]</sup>

**TTCCl<sub>2</sub>-Br<sub>2</sub>** (300 mg, 624 μmol), bis(pinacolato)diboron (348 mg, 1.37 mmol), Pd(dppf)Cl<sub>2</sub> (22.8 mg, 31.2 μmol), potassium acetate (245 mg, 2.50 mmol) in dry dioxane (15 ml), 1 d, 80 °C. Column chromatography (silica gel, eluent: DCM/hexanes 3:2 – DCM).

**Yield:** 129 mg (224 μmol, 36 %) of a colourless solid.

C<sub>32</sub>H<sub>34</sub>B<sub>2</sub>Cl<sub>2</sub>O<sub>4</sub> [575.14 g/mol].

**<sup>1</sup>H-NMR** (400.1 MHz, CDCl<sub>3</sub>):

δ [ppm] = 7.82 (s, 2H), 7.50 (dd, <sup>3</sup>J<sub>H,H</sub> = 7.3 Hz, <sup>4</sup>J<sub>H,H</sub> = 1.1 Hz, 2H), 7.41 (s, 2H), 7.36 (d, <sup>3</sup>J<sub>H,H</sub> = 7.3 Hz, 2H), 5.39 (s, 2H), 1.30 (s, 24H).

**<sup>13</sup>C-NMR** (100.6 MHz, CDCl<sub>3</sub>):

δ [ppm] = 147.4 (C<sub>q</sub>), 145.0 (C<sub>q</sub>), 143.3 (C<sub>q</sub>), 132.9 (CH), 129.9 (CH), 128.7 (C<sub>q</sub>), 125.8 (CH), 123.5 (CH), 83.9 (C<sub>q</sub>), 53.4 (CH), 25.0 (CH<sub>3</sub>), 24.9 (CH<sub>3</sub>).

**APCI-MS:** m / z: calc. [M]<sup>++</sup> 574.2027; found [M]<sup>++</sup> 574.2034.

## TTCO<sub>2</sub>-Br<sub>2</sub>

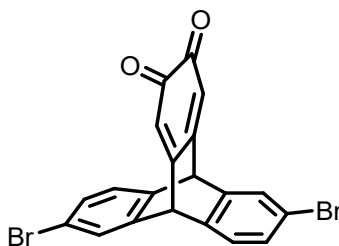

Synthesis according to literature.<sup>[5]</sup>

CA: [-]

**TTC(OMe)<sub>2</sub>-Br<sub>2</sub>** (2.07 g, 4.38 mmol) was dissolved in DCM (100 ml) and acetic acid (100 ml) was added. Concentrated nitric acid (21 ml) was added dropwise until a colour change to dark red appeared. The reaction mixture was poured on ice water immediately. The product was extracted with DCM, the organic phases were combined and washed with sodium bicarbonate solution (10 %, 70 ml). The organic phase was dried over Na<sub>2</sub>CO<sub>3</sub> and the solvent removed under reduced pressure. The crude product was purified by column chromatography (silica gel, eluent: DCM).

**Yield:** 1.03 g (2.33 mmol, 53 %) of a red solid.

C<sub>20</sub>H<sub>10</sub>Br<sub>2</sub>O<sub>2</sub> [442.10 g/mol].

**<sup>1</sup>H-NMR** (400.1 MHz, CDCl<sub>3</sub>):

δ [ppm] = 7.59 (d, <sup>4</sup>J<sub>H,H</sub> = 1.9 Hz, 2H), 7.42 (dd, <sup>3</sup>J<sub>H,H</sub> = 8.0 Hz, <sup>4</sup>J<sub>H,H</sub> = 1.9 Hz, 2H), 7.30 (d, <sup>3</sup>J<sub>H,H</sub> = 8.0 Hz, 2H), 6.36 (s, 2H), 5.08 (s, 2H).

**<sup>13</sup>C-NMR** (100.6 MHz, CDCl<sub>3</sub>):

δ [ppm] = 179.5 (C<sub>q</sub>), 151.7 (C<sub>q</sub>), 140.6 (C<sub>q</sub>), 137.3 (C<sub>q</sub>), 131.3 (CH), 127.9 (CH), 126.2 (CH), 122.3 (CH), 122.2 (C<sub>q</sub>), 51.3 (CH).

**APCI-HRMS:** m / z: calc. [M+H]<sup>+</sup> 442.91010; found [M+H]<sup>+</sup> 442.91084, Δ = 1.67 ppm.



## TTC(PAZ)-Br<sub>2</sub>

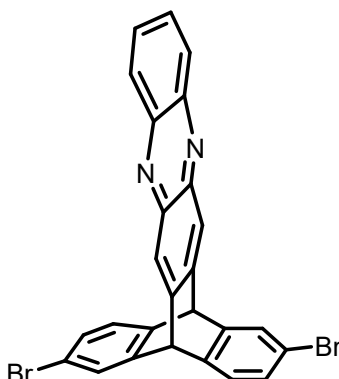

Synthesis according to literature.<sup>[5]</sup>

CA: [-]

**TTCO<sub>2</sub>-Br<sub>2</sub>** (500 mg, 1.13 mmol) and benzene-1,2-diamine (245 mg, 2.27 mmol) were dissolved in chloroform (80 ml) and acetic acid (80 ml) was added. The reaction mixture was stirred for 1 d at 110 °C and then poured on ice water (100 ml). The aqueous phase was neutralised with sodium carbonate solution (10 %) and the product was extracted with DCM (200 ml). The organic phases were combined, washed with sodium carbonate solution (10 %, 100 ml) and dried over Na<sub>2</sub>CO<sub>3</sub>. The solvent was removed under reduced pressure. The crude product was purified by column chromatography (silica gel, eluent: DCM).

**Yield:** 456 mg (887 μmol, 78 %) of a yellow solid.

C<sub>26</sub>H<sub>14</sub>Br<sub>2</sub>N<sub>2</sub> [514.21 g/mol].

**<sup>1</sup>H-NMR** (400.1 MHz, CDCl<sub>3</sub>):

δ [ppm] = 8.18 (m, 2H), 8.08 (s, 2H), 7.77 (m, 2H), 7.64 (d, <sup>4</sup>J<sub>H,H</sub> = 1.8 Hz, 2H), 7.34 (d, <sup>3</sup>J<sub>H,H</sub> = 7.9 Hz, 2H), 7.24 (dd, <sup>3</sup>J<sub>H,H</sub> = 7.9 Hz, <sup>4</sup>J<sub>H,H</sub> = 1.8 Hz, 2H), 5.59 (s, 2H).

**<sup>13</sup>C-NMR** (100.6 MHz, CDCl<sub>3</sub>):

δ [ppm] = 145.1 (C<sub>q</sub>), 145.0 (C<sub>q</sub>), 143.3 (C<sub>q</sub>), 142.8 (C<sub>q</sub>), 141.8 (C<sub>q</sub>), 130.2 (CH), 129.6 (CH), 129.4 (CH), 127.6 (CH), 125.9 (CH), 123.1 (CH), 120.0 (C<sub>q</sub>), 52.6 (CH).

**APCI-HRMS:** m / z: calc. [M+H]<sup>+</sup> 514.95778; found [M+H]<sup>+</sup> 514.95746, Δ = 0.62 ppm.

## TTC(PAZ)-(Bpin)<sub>2</sub>

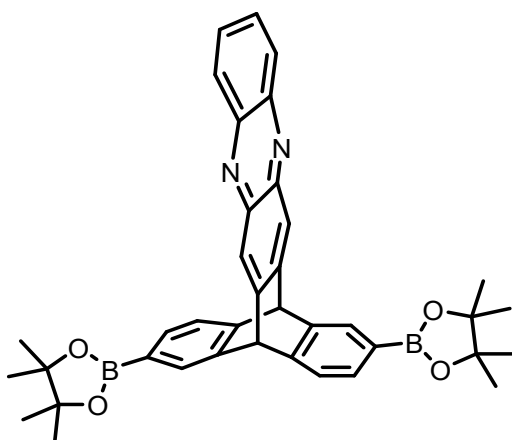

CA: [-]

Synthesis according to **GP II**.<sup>[4]</sup>

**TTC(PAZ)-Br<sub>2</sub>** (440 mg, 856  $\mu$ mol), bis(pinacolato)diboron (543 mg, 2.14 mmol), Pd(dppf)Cl<sub>2</sub> (34.9 mg, 47.7  $\mu$ mol), potassium acetate (336 mg, 3.42 mmol) in dry dioxane (10 ml) 3 d, 80 °C. Column chromatography (silica gel, eluent: DCM – DCM/EA 500:25).

**Yield:** 198 mg (325  $\mu$ mol, 38 %) of a yellow solid.

C<sub>38</sub>H<sub>38</sub>B<sub>2</sub>N<sub>2</sub>O<sub>4</sub> [608.34 g/mol].

**<sup>1</sup>H-NMR** (400.1 MHz, CDCl<sub>3</sub>):

$\delta$  [ppm] = 8.17 (m, 2H), 8.05 (s, 2H), 7.94 (s, 2H), 7.76 (m, 2H), 7.57 (dd, <sup>3</sup>J<sub>H,H</sub> = 7.3 Hz, <sup>4</sup>J<sub>H,H</sub> = 1.1 Hz, 2H), 7.49 (d, <sup>3</sup>J<sub>H,H</sub> = 7.3 Hz, 2H), 5.68 (s 2H), 1.30 (s, 24H).

**<sup>13</sup>C-NMR** (100.6 MHz, CDCl<sub>3</sub>):

$\delta$  [ppm] = 146.5 (C<sub>q</sub>), 146.3 (C<sub>q</sub>), 143.2 (C<sub>q</sub>), 143.0 (C<sub>q</sub>), 142.3 (C<sub>q</sub>), 133.4 (CH), 130.3 (CH), 129.9 (CH), 129.6 (CH), 123.8 (CH), 122.7 (CH), 84.0 (C<sub>q</sub>), 53.8 (CH), 25.0 (CH<sub>3</sub>), 24.9 (CH<sub>3</sub>).<sup>3</sup>

**APCI-MS:** m / z: calc. [M+H]<sup>+</sup> 609.3103; found [M+H]<sup>+</sup> 609.3096.

<sup>3</sup> The C<sub>q</sub> next to the Bpin group is not visible.

## Bpin-TTC(OMe)<sub>2</sub>-PDI

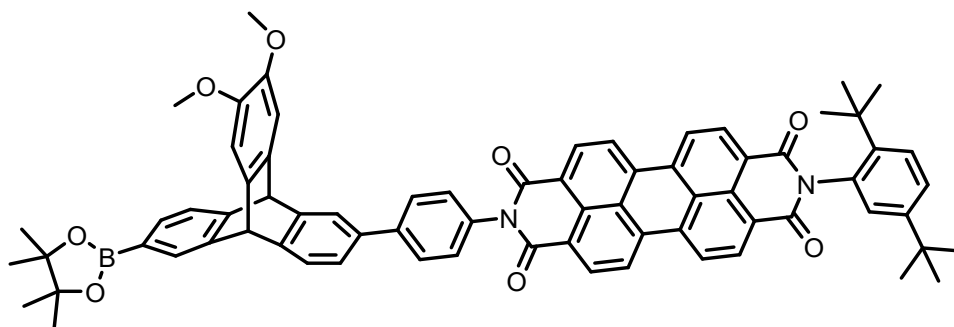

CA: [-]

Synthesis according to **GP III**.<sup>[4]</sup>

**TTC(OMe)<sub>2</sub>-(Bpin)<sub>2</sub>** (300 mg, 530  $\mu$ mol), **PDI-I** (103 mg, 132  $\mu$ mol), sodium carbonate (225 mg, 2.12 mmol) in THF (6 ml) and water (1.5 ml). Pd(PPh<sub>3</sub>)<sub>4</sub> (30.6 mg, 26.5  $\mu$ mol). Column chromatography on silica gel (eluent: DCM – DCM/toluene (4:1) – DCM/toluene/EA (400:100:1)).

**Yield:** 50.0 mg (45.7  $\mu$ mol, 34 %) of a red solid.

C<sub>72</sub>H<sub>61</sub>BN<sub>2</sub>O<sub>8</sub> [1093.08 g/mol]

**<sup>1</sup>H-NMR** (400.1 MHz, CDCl<sub>3</sub>):

$\delta$  [ppm] = 8.75 (m', 8H), 7.86 (s, 1H), 7.68 (AA', 2H), 7.65 (d, <sup>4</sup>J<sub>H,H</sub> = 1.7 Hz, 1H), 7.61 (d, <sup>3</sup>J<sub>H,H</sub> = 8.6 Hz, 1H), 7.51 (dd, <sup>3</sup>J<sub>H,H</sub> = 7.3 Hz, <sup>4</sup>J<sub>H,H</sub> = 1.1 Hz, 1H), 7.48 (dd, <sup>3</sup>J<sub>H,H</sub> = 8.6 Hz, <sup>4</sup>J<sub>H,H</sub> = 2.3 Hz, 1H), 7.44 (m', 2H), 7.38 (BB', 2H), 7.25 (m, 1H), 7.05 (m', 3H), 5.44 (s, 1H), 5.43 (s, 1H), 3.85 (s, 3H), 3.84 (s, 3H), 1.33 (s, 9H), 1.31 (s, 12H), 1.30 (s, 9H).

**<sup>13</sup>C-NMR** (100.6 MHz, CDCl<sub>3</sub>):

$\delta$  [ppm] = 164.5 (C<sub>q</sub>), 163.8 (C<sub>q</sub>), 150.3 (C<sub>q</sub>), 149.0 (C<sub>q</sub>), 146.3 (C<sub>q</sub>), 146.2 (C<sub>q</sub>), 146.1 (C<sub>q</sub>), 145.2 (C<sub>q</sub>), 145.1 (C<sub>q</sub>), 143.9 (C<sub>q</sub>), 142.2 (C<sub>q</sub>), 137.9 (C<sub>q</sub>), 137.8 (C<sub>q</sub>), 137.5 (C<sub>q</sub>), 135.3 (C<sub>q</sub>), 135.1 (C<sub>q</sub>), 134.0 (C<sub>q</sub>), 132.7 (C<sub>q</sub>), 132.5 (CH), 132.1 (CH), 132.08 (CH), 130.0 (C<sub>q</sub>), 129.98 (C<sub>q</sub>), 129.3 (CH), 129.0 (CH), 128.9 (CH), 128.5 (CH), 127.8 (CH), 126.94 (C<sub>q</sub>), 126.87 (C<sub>q</sub>), 126.6 (CH), 124.5 (CH), 123.9 (C<sub>q</sub>), 123.8 (CH), 123.6 (C<sub>q</sub>), 123.54 (CH), 123.46 (CH), 123.1

(CH), 122.9 (CH), 108.8 (CH), 108.6 (CH), 83.8 (C<sub>q</sub>), 56.4 (CH<sub>3</sub>), 56.3 (CH<sub>3</sub>), 54.2 (CH), 53.5 (CH), 35.7 (C<sub>q</sub>), 34.4 (C<sub>q</sub>), 31.9 (CH<sub>3</sub>), 31.4 (CH<sub>3</sub>), 25.0 (CH<sub>3</sub>), 24.9 (CH<sub>3</sub>).<sup>4</sup>

**MALDI-MS** (pos): m/z calc. [M]<sup>+</sup> 1092.45270, found [M]<sup>+</sup> 1092.44710.

### Bpin-TTCMe<sub>2</sub>-PDI

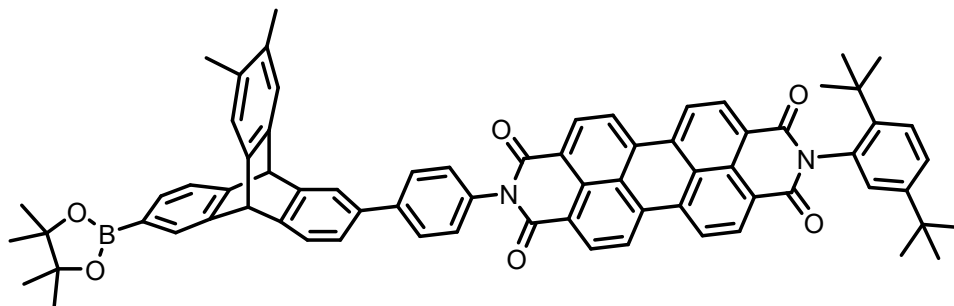

CA: [-]

Synthesis according to **GP III**.<sup>[4]</sup>

**TTCMe<sub>2</sub>-(Bpin)<sub>2</sub>** (100 mg, 187 μmol), **PDI-I** (73.1 mg, 93.6 μmol), sodium carbonate (49.6 mg, 468 μmol) in THF (12 ml) and water (3 ml). Pd(PPh<sub>3</sub>)<sub>4</sub> (5.41 mg, 4.68 μmol). Column chromatography on silica gel (eluent: DCM – DCM/toluene/EA (400:100:10)).

**Yield:** 28.0 mg (26.4 μmol, 28 %) of a red solid.

C<sub>72</sub>H<sub>61</sub>BN<sub>2</sub>O<sub>6</sub> [1061.08 g/mol]

**<sup>1</sup>H-NMR** (400.1 MHz, CDCl<sub>3</sub>):

δ [ppm] = 8.74 (m', 8H), 7.85 (s, 1H), 7.66 (AA', 2H), 7.63 (d, <sup>4</sup>J<sub>H,H</sub> = 1.8 Hz, 1H), 7.61 (d, <sup>3</sup>J<sub>H,H</sub> = 8.6 Hz, 1H), 7.49 (m', 2H), 7.42 (m' 2H), 7.37 (BB', 2H), 7.22 (m', 3H), 7.04 (d, <sup>4</sup>J<sub>H,H</sub> = 2.2 Hz, 1H), 5.45 (s, 1H), 5.43 (s, 1H), 2.17 (s, 3H), 2.16 (s, 3H), 1.33 (s, 9H), 1.30 (m', 21H).

**<sup>13</sup>C-NMR** (100.6 MHz, CDCl<sub>3</sub>):

<sup>4</sup> C<sub>q</sub> next to the Bpin group is not visible.

$\delta$  [ppm] = 164.6 (C<sub>q</sub>), 163.8 (C<sub>q</sub>), 150.3 (C<sub>q</sub>), 148.9 (C<sub>q</sub>), 146.0 (C<sub>q</sub>), 145.1 (C<sub>q</sub>), 144.9 (C<sub>q</sub>), 143.9 (C<sub>q</sub>), 142.8 (C<sub>q</sub>), 142.5 (C<sub>q</sub>), 142.4 (C<sub>q</sub>), 137.8 (C<sub>q</sub>), 135.3 (C<sub>q</sub>), 135.1 (C<sub>q</sub>), 133.9 (C<sub>q</sub>), 133.4 (C<sub>q</sub>), 133.2 (C<sub>q</sub>), 132.7 (C<sub>q</sub>), 132.5 (CH), 132.10 (CH), 132.09 (CH), 130.00 (C<sub>q</sub>), 129.99 (C<sub>q</sub>), 129.5 (CH), 129.0 (2 x CH), 128.5 (CH), 127.8 (CH), 127.0 (C<sub>q</sub>), 126.9 (C<sub>q</sub>), 126.6 (CH), 125.4 (CH), 125.3 (CH), 124.6 (CH), 123.94 (CH), 123.91 (C<sub>q</sub>), 123.6 (C<sub>q</sub>), 123.5 (CH), 123.47 (CH), 123.3 (CH), 123.0 (CH), 83.8 (C<sub>q</sub>), 54.1 (CH), 53.4 (CH), 35.7 (C<sub>q</sub>), 34.4 (C<sub>q</sub>), 31.9 (CH<sub>3</sub>), 31.4 (CH<sub>3</sub>), 25.0 (CH<sub>3</sub>), 24.9 (CH<sub>3</sub>), 19.68 (CH<sub>3</sub>), 19.67 (CH<sub>3</sub>).<sup>5</sup>

**MALDI-MS** (pos): m/z calc. [M]<sup>+</sup> 1060.46287, found [M]<sup>+</sup> 1060.46272.

### Bpin-TTCCl<sub>2</sub>-PDI

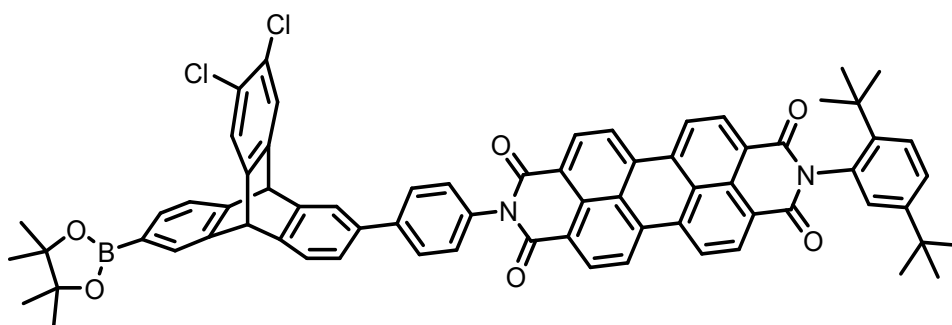

CA: [-]

Synthesis according to **GP III**.<sup>[4]</sup>

**TTCCl<sub>2</sub>-(Bpin)<sub>2</sub>** (320 mg, 556  $\mu$ mol), **PDI-I** (217 mg, 278  $\mu$ mol) sodium carbonate (118 mg, 1.11 mmol) in THF (24 ml) and water (6 ml). Pd(PPh<sub>3</sub>)<sub>4</sub> (16.1 mg, 13.9  $\mu$ mol) Column chromatography on silica gel (eluent: DCM – DCM/toluene (5:1) – DCM/toluene/EA (400:100:20)).

**Yield:** 49.0 mg (44.5  $\mu$ mol, 16 %) of a red solid.

C<sub>70</sub>H<sub>55</sub>BCl<sub>2</sub>N<sub>2</sub>O<sub>6</sub> [1101.91 g/mol]

<sup>5</sup> C<sub>q</sub> next to the Bpin group is not visible.

**<sup>1</sup>H-NMR** (400.1 MHz, CDCl<sub>3</sub>):

δ [ppm] = 8.74 (m', 8H), 7.88 (s, 1H), 7.67 (m', 3H), 7.61 (d, <sup>3</sup>J<sub>H,H</sub> = 8.7 Hz, 1H), 7.55 (dd, <sup>3</sup>J<sub>H,H</sub> = 7.3 Hz, <sup>4</sup>J<sub>H,H</sub> = 1.1 Hz, 1H), 7.48 (m', 5H), 7.39 (AA', 2H), 7.30 (dd, <sup>3</sup>J<sub>H,H</sub> = 7.6 Hz, <sup>4</sup>J<sub>H,H</sub> = 1.8 Hz, 1H), 7.05 (d, <sup>4</sup>J<sub>H,H</sub> = 2.2 Hz, 1H), 5.48 (s, 1H), 5.45 (s, 1H), 1.33 (s, 9H), 1.32 (s, 12H), 1.30 (s, 9H).

**<sup>13</sup>C-NMR** (100.6 MHz, CDCl<sub>3</sub>):

δ [ppm] = 164.5 (C<sub>q</sub>), 163.8 (C<sub>q</sub>), 150.4 (C<sub>q</sub>), 147.4 (C<sub>q</sub>), 145.3 (C<sub>q</sub>), 145.0 (C<sub>q</sub>), 144.7 (C<sub>q</sub>), 143.9 (C<sub>q</sub>), 143.7 (C<sub>q</sub>), 143.6 (C<sub>q</sub>), 141.9 (C<sub>q</sub>), 138.4 (C<sub>q</sub>), 135.3 (C<sub>q</sub>), 135.0 (C<sub>q</sub>), 134.2 (C<sub>q</sub>), 133.0 (CH), 132.6 (C<sub>q</sub>), 132.1 (CH), 132.1 (CH), 130.0 (C<sub>q</sub>), 130.0 (C<sub>q</sub>), 129.9 (CH), 129.0 (2 x CH), 128.9 (C<sub>q</sub>), 128.8 (C<sub>q</sub>), 128.5 (CH), 127.9 (CH), 126.92 (C<sub>q</sub>), 126.86 (C<sub>q</sub>), 126.6 (CH), 126.0 (CH), 125.8 (CH), 125.0 (CH), 124.3 (CH), 124.0 (C<sub>q</sub>), 123.6 (CH), 123.54 (CH), 123.53 (C<sub>q</sub>), 123.5 (CH), 123.3 (CH), 84.0 (C<sub>q</sub>), 53.6 (CH), 52.9 (CH), 35.7 (C<sub>q</sub>), 34.4 (C<sub>q</sub>), 31.9 (CH<sub>3</sub>), 31.3 (CH<sub>3</sub>), 25.0 (CH<sub>3</sub>), 24.9 (CH<sub>3</sub>).<sup>6</sup>

**APCI-MS:** (pos): m/z calc. [M+H]<sup>+</sup> 1101.3614, found [M+H]<sup>+</sup> 1101.3489.

### Bpin-TTC(PAZ)-PDI

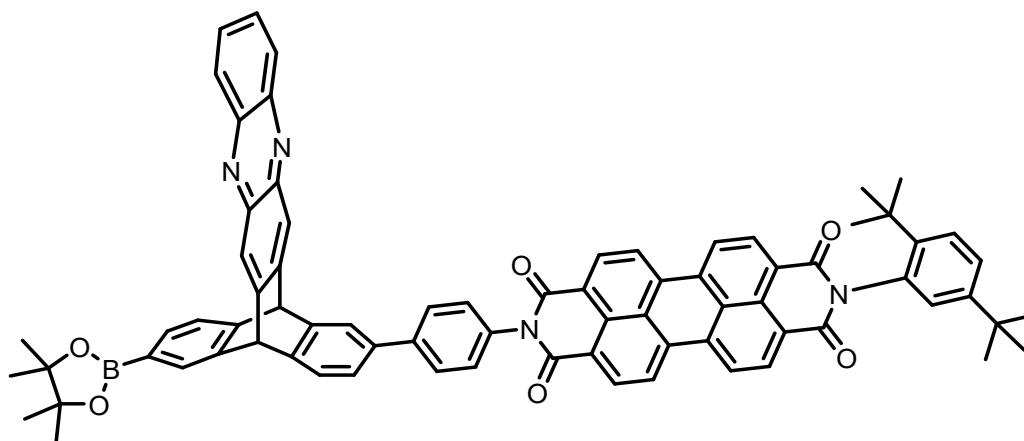

Synthesis according to literature.<sup>[4]</sup>

CA: [-]

Synthesis according to **GP III**.

<sup>6</sup> C<sub>q</sub> next to Bpin-group not visible in NMR.

**TTC(PAZ)-(Bpin)<sub>2</sub>** (150 mg, 247  $\mu\text{mol}$ ), **PDI-I** (96.2 mg, 123  $\mu\text{mol}$ ), sodium carbonate (52.3 mg, 493  $\mu\text{mol}$ ) in THF (6 ml) and water (1.5 ml). Pd(PPh<sub>3</sub>)<sub>4</sub> (7.12 mg, 6.16  $\mu\text{mol}$ ). Column chromatography on silica gel (eluent: DCM/EA (10:1)).

**Yield:** 38.0 mg (33.5  $\mu\text{mol}$ , 27 %) of a red solid.

C<sub>76</sub>H<sub>59</sub>BN<sub>4</sub>O<sub>6</sub> [1135.12 g/mol]

**<sup>1</sup>H-NMR** (400.1 MHz, CDCl<sub>3</sub>):

$\delta$  [ppm] = 8.73 (m', 8H), 8.18 (m, 2H), 8.14 (s, 1H), 8.10 (s, 1H), 8.00 (s, 1H), 7.78 (m', 3H), 7.71 (AA', 2H), 7.61 (m', 4H), 7.48 (dd, <sup>3</sup>J<sub>H,H</sub> = 8.6 Hz, <sup>4</sup>J<sub>H,H</sub> = 2.3 Hz, 1H), 7.40 (m', 3H), 7.05 (d, <sup>4</sup>J<sub>H,H</sub> = 2.3 Hz, 1H), 5.78 (s, 1H), 5.75 (s, 1H), 1.33 (s, 9H), 1.32 (s, 12H), 1.30 (s, 9H).

**<sup>13</sup>C-NMR** (100.6 MHz, CDCl<sub>3</sub>):

$\delta$  [ppm] = 164.5 (C<sub>q</sub>), 163.8 (C<sub>q</sub>), 150.3 (C<sub>q</sub>), 146.41 (C<sub>q</sub>), 146.38 (C<sub>q</sub>), 146.2 (C<sub>q</sub>), 143.9 (C<sub>q</sub>), 143.7 (C<sub>q</sub>), 143.20 (C<sub>q</sub>), 143.18 (C<sub>q</sub>), 143.13 (C<sub>q</sub>), 143.06 (C<sub>q</sub>), 142.8 (C<sub>q</sub>), 142.6 (C<sub>q</sub>), 141.8 (C<sub>q</sub>), 139.0 (C<sub>q</sub>), 135.3 (C<sub>q</sub>), 135.0 (C<sub>q</sub>), 134.3 (C<sub>q</sub>), 133.5 (CH), 132.7 (C<sub>q</sub>), 132.09 (CH), 132.07 (CH), 130.3 (CH), 130.00 (C<sub>q</sub>, CH), 129.98 (C<sub>q</sub>), 129.97 (CH), 129.6 (2 x CH), 129.0 (2 x CH), 128.5 (CH), 127.9 (CH), 126.92 (C<sub>q</sub>), 126.86 (C<sub>q</sub>), 126.6 (CH), 125.7 (CH), 124.7 (CH), 123.9 (C<sub>q</sub>, CH), 123.6 (CH), 123.5 (CH), 123.45 (C<sub>q</sub>), 123.4 (CH), 122.9 (CH), 122.7 (CH), 84.0 (C<sub>q</sub>), 54.0 (CH), 54.3 (CH), 35.7 (C<sub>q</sub>), 34.4 (C<sub>q</sub>), 31.9 (CH<sub>3</sub>), 31.4 (CH<sub>3</sub>), 25.0 (CH<sub>3</sub>), 24.9 (CH<sub>3</sub>).

**MALDI-MS** (pos): m/z calc. [M+H]<sup>+</sup> 1135.46124 , found [M]<sup>+</sup> 1135.46246.

## TAA-TTC(OMe)<sub>2</sub>-PDI

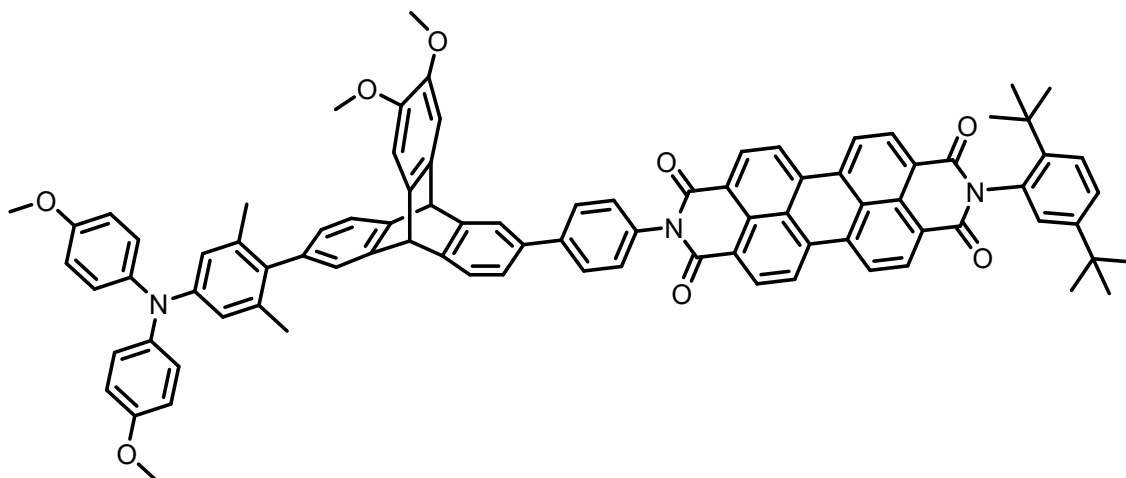

CA: [-]

Synthesis according to **GP III**.<sup>[4]</sup>

**Bpin-TTC(OMe)<sub>2</sub>-PDI** (50.0 mg, 45.7  $\mu$ mol), **TAAMe<sub>2</sub>-Br** (37.7 mg, 91.4  $\mu$ mol), sodium carbonate (19.4 mg, 183  $\mu$ mol) in THF (6 ml) and water (1.5 ml). Pd(PPh<sub>3</sub>)<sub>4</sub> (2.64 mg, 2.28  $\mu$ mol). Column chromatography (eluent: DCM – DCM/EA (50:1)). The product was dissolved in DCM and precipitated by addition of hexane.

**Yield:** 23.0 mg (17.7  $\mu$ mol, 39 %) of a red solid.

C<sub>88</sub>H<sub>71</sub>N<sub>3</sub>O<sub>8</sub> [1298.52 g/mol]

**<sup>1</sup>H-NMR** (600.1 MHz, CD<sub>2</sub>Cl<sub>2</sub>):

$\delta$  [ppm] = 8.74 (m', 8H), 7.75 (m', 3H), 7.62 (d, <sup>3</sup>J<sub>H,H</sub> = 8.6 Hz, 1H), 7.50 (m', 3H), 7.41 (AA', 2H), 7.35 (dd, <sup>3</sup>J<sub>H,H</sub> = 7.6 Hz, <sup>4</sup>J<sub>H,H</sub> = 1.8 Hz, 1H), 7.23 (dd, <sup>4</sup>J<sub>H,H</sub> = 1.5 Hz, 1H), 7.09 (m', 3H), 7.04 (AA', 4H), 6.83 (m', 5H), 6.63 (s, 2H), 5.51 (s, 1H), 5.43 (s, 1H), 3.83 (s, 3H), 3.82 (s, 3H), 3.78 (s, 6H), 1.84 (s, 6H), 1.33 (s, 9H), 1.28 (s, 9H).

**<sup>13</sup>C-NMR** (150.9 MHz, CD<sub>2</sub>Cl<sub>2</sub>):

$\delta$  [ppm] = 164.8 (C<sub>q</sub>), 164.0 (C<sub>q</sub>), 156.1 (C<sub>q</sub>), 150.8 (C<sub>q</sub>), 147.7 (C<sub>q</sub>), 147.3 (C<sub>q</sub>), 146.71 (C<sub>q</sub>), 146.70 (C<sub>q</sub>), 146.1 (C<sub>q</sub>), 146.0 (C<sub>q</sub>), 144.6 (C<sub>q</sub>), 144.0 (C<sub>q</sub>), 142.1 (C<sub>q</sub>), 141.6 (C<sub>q</sub>), 138.44



(C<sub>q</sub>), 138.41 (C<sub>q</sub>), 137.7 (C<sub>q</sub>), 137.2 (C<sub>q</sub>), 137.1 (C<sub>q</sub>), 135.5 (C<sub>q</sub>), 135.4 (C<sub>q</sub>), 134.9 (C<sub>q</sub>), 134.8 (C<sub>q</sub>), 133.6 (C<sub>q</sub>), 132.1 (CH), 132.0 (CH), 130.2 (C<sub>q</sub>), 130.1 (C<sub>q</sub>), 129.5 (CH), 129.3 (CH), 128.4 (CH), 128.3 (CH), 127.2 (C<sub>q</sub>), 127.1 (C<sub>q</sub>), 126.6 (CH), 126.5 (C<sub>q</sub>, CH), 125.1 (CH), 124.6 (CH), 124.09 (CH), 124.07 (C<sub>q</sub>), 123.9 (CH), 123.88 (CH), 123.87 (C<sub>q</sub>), 123.7 (CH), 123.4 (CH), 122.9 (CH), 120.1 (2 x CH), 114.9 (CH), 109.5 (CH), 109.4 (CH), 56.6 (2 x CH<sub>3</sub>), 55.8 (CH<sub>3</sub>), 54.2 (2 x CH), 50.8 (C<sub>q</sub>), 35.8 (C<sub>q</sub>), 34.6 (C<sub>q</sub>), 31.8 (CH<sub>3</sub>), 31.3 (CH<sub>3</sub>), 21.31 (CH<sub>3</sub>), 21.29 (CH<sub>3</sub>).

**MALDI-HRMS** (pos): m/z calc. [M]<sup>+</sup> 1297.52357, found [M]<sup>+</sup> 1297.52841,  $\Delta$  = 3.73 ppm.

### TAA-TTC(Me)<sub>2</sub>-PDI

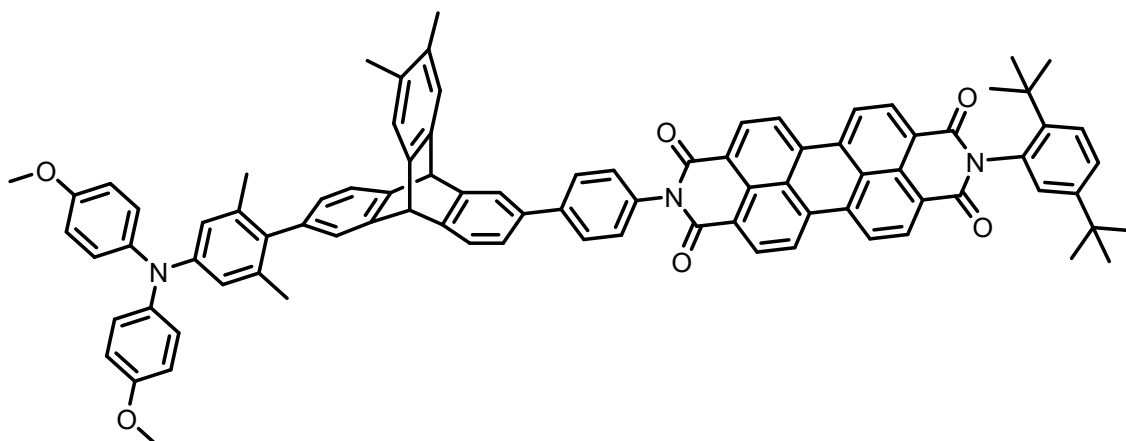

CA: [-]

Synthesis according to **GP III**.<sup>[4]</sup>

**(Bpin)-TTCMe<sub>2</sub>-PDI** (35.0 mg, 33.0  $\mu$ mol), **TAAME<sub>2</sub>-Br** (27.2 mg, 66.0  $\mu$ mol), sodium carbonate (14.0 mg, 132  $\mu$ mol) in THF (6 ml) and water (1.5 ml). Pd(PPh<sub>3</sub>)<sub>4</sub> (1.91 mg, 1.65  $\mu$ mol). Column chromatography (eluent: DCM – DCM/EA (100:1)). The product was dissolved in DCM and precipitated by addition of hexane.

**Yield:** 4.00 mg (3.16  $\mu$ mol, 10 %) of a red solid.

C<sub>88</sub>H<sub>71</sub>N<sub>3</sub>O<sub>6</sub> [1266.53 g/mol]

**<sup>1</sup>H-NMR** (600.1 MHz, CD<sub>2</sub>Cl<sub>2</sub>):

$\delta$  [ppm] = 8.74 (m', 8H), 7.74 (m', 3H), 7.63 (d,  $^3J_{H,H} = 8.7$  Hz, 1H), 7.49 (m', 3H), 7.40 (BB', 2H), 7.34 (dd,  $^3J_{H,H} = 7.6$  Hz,  $^4J_{H,H} = 1.8$  Hz, 1H), 7.24 (m', 3H), 7.07 (d,  $^4J_{H,H} = 2.3$  Hz, 1H), 7.04 (AA', 4H), 6.83 (m', 5H), 6.62 (s, 2H), 5.51 (s, 1H), 5.44 (s, 1H), 3.78 (s, 6H), 2.21 (s, 3H), 2.20 (s, 3H), 1.84 (s, 3H), 1.82 (s, 3H), 1.33 (s, 9H), 1.28 (s, 9H).

$^{13}\text{C-NMR}$  (150.9 MHz,  $\text{CD}_2\text{Cl}_2$ ):

$\delta$  [ppm] = 164.9 (C<sub>q</sub>), 164.0 (C<sub>q</sub>), 156.1 (C<sub>q</sub>), 150.8 (C<sub>q</sub>), 147.6 (C<sub>q</sub>), 147.1 (C<sub>q</sub>), 145.9 (C<sub>q</sub>), 145.8 (C<sub>q</sub>), 144.6 (C<sub>q</sub>), 143.8 (C<sub>q</sub>), 143.29 (C<sub>q</sub>), 143.26 (C<sub>q</sub>), 142.2 (C<sub>q</sub>), 141.6 (C<sub>q</sub>), 138.4 (C<sub>q</sub>), 137.8 (C<sub>q</sub>), 137.2 (C<sub>q</sub>), 137.1 (C<sub>q</sub>), 135.5 (C<sub>q</sub>), 135.4 (C<sub>q</sub>), 134.9 (2 x C<sub>q</sub>), 133.60 (C<sub>q</sub>), 133.59 (C<sub>q</sub>), 133.58 (C<sub>q</sub>), 132.1 (CH), 132.0 (CH), 130.23 (C<sub>q</sub>), 130.16 (C<sub>q</sub>), 129.4 (CH), 129.3 (CH), 128.4 (CH), 128.3 (CH), 127.2 (C<sub>q</sub>), 127.1 (C<sub>q</sub>), 126.8 (CH), 126.7 (CH), 126.5 (CH), 125.5 (CH), 125.4 (CH), 125.2 (CH), 124.6 (CH), 124.2 (CH), 124.1 (C<sub>q</sub>), 123.90 (CH), 123.89 (CH), 123.88 (C<sub>q</sub>), 123.81 (CH), 122.9 (CH), 120.11 (CH), 120.09 (CH), 114.9 (CH), 55.8 (CH<sub>3</sub>), 54.2 (CH), 54.0 (CH), 35.8 (C<sub>q</sub>), 34.6 (C<sub>q</sub>), 31.8 (CH<sub>3</sub>), 31.3 (CH<sub>3</sub>), 21.31 (CH<sub>3</sub>), 21.27 (CH<sub>3</sub>), 19.6 (2 x CH<sub>3</sub>).

**MALDI-HRMS** (pos): m/z calc.  $[\text{M}]^+ 1265.53374$ , found  $[\text{M}]^+ 1265.53127$ ,  $\Delta = 1.95$  ppm.

### TAA-TTC(Cl)<sub>2</sub>-PDI

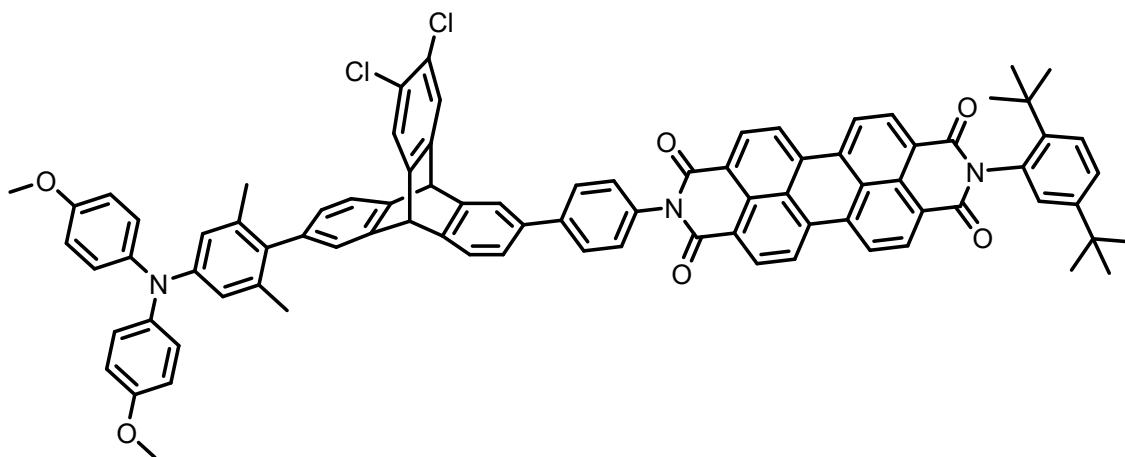

CA: [-]

Synthesis according to **GP III**.<sup>[4]</sup>

**Bpin-TTCCl<sub>2</sub>-PDI** (49.0 mg, 44.5  $\mu\text{mol}$ ), **TAAMe<sub>2</sub>-Br** (36.7 mg, 89.0  $\mu\text{mol}$ ), sodium carbonate (18.9 mg, 178  $\mu\text{mol}$ ) in THF (6 ml) and water (1.5 ml).  $\text{Pd}(\text{PPh}_3)_4$  (2.57 mg, 2.22  $\mu\text{mol}$ ). Column

chromatography (eluent: DCM – DCM/toluene (4:1) – DCM/toluene/EA (400:100:3)). The product was dissolved in DCM and precipitated by addition of hexane.

**Yield:** 26.0 mg (19.9  $\mu$ mol, 45 %) of a red solid.

$C_{86}H_{65}Cl_2N_3O_6$  [1307.36 g/mol]

**$^1H$ -NMR** (600.1 MHz,  $CD_2Cl_2$ ):

$\delta$  [ppm] = 8.73 (m', 8H), 7.78 (d,  $^4J_{H,H} = 1.8$  Hz, 1H), 7.75 (AA', 2H), 7.62 (d,  $^3J_{H,H} = 8.7$  Hz, 1H), 7.55 (m', 5H), 7.42 (BB', 2H), 7.39 (dd,  $^3J_{H,H} = 7.5$  Hz,  $^4J_{H,H} = 1.8$  Hz, 1H), 7.25 (d,  $^4J_{H,H} = 1.5$  Hz, 1H), 7.09 (d,  $^3J_{H,H} = 2.2$  Hz, 1H), 7.04 (AA', 4H), 6.86 (dd,  $^3J_{H,H} = 7.5$  Hz,  $^4J_{H,H} = 1.7$  Hz, 1H), 6.83 (BB', 4H), 6.62 (s, 2H), 5.57 (s, 1H), 5.49 (s, 1H), 3.78 (s, 6H), 1.83 (s, 3H), 1.81 (s, 3H), 1.33 (s, 9H), 1.27 (s, 9H).

**$^{13}C$ -NMR** (150.9 MHz,  $CD_2Cl_2$ ):

$\delta$  [ppm] = 164.8 ( $C_q$ ), 164.0 ( $C_q$ ), 156.1 ( $C_q$ ), 150.8 ( $C_q$ ), 147.8 ( $C_q$ ), 146.2 ( $C_q$ ), 146.1 ( $C_q$ ), 145.7 ( $C_q$ ), 144.6 (2 x  $C_q$ ), 144.5 ( $C_q$ ), 142.5 ( $C_q$ ), 141.8 (2 x  $C_q$ ), 141.6 ( $C_q$ ), 139.1 ( $C_q$ ), 137.14 ( $C_q$ ), 137.06 ( $C_q$ ), 135.43 ( $C_q$ ), 135.36 ( $C_q$ ), 135.1 ( $C_q$ ), 134.5 ( $C_q$ ), 133.6 ( $C_q$ ), 132.04 (CH), 131.98 (CH), 130.2 ( $C_q$ ), 130.1 ( $C_q$ ), 129.5 (CH), 129.2 (CH), 128.79 ( $C_q$ ), 128.77 ( $C_q$ ), 128.4 (CH), 128.3 (CH), 127.4 (CH), 127.13 ( $C_q$ ), 127.07 ( $C_q$ ), 126.8 (CH), 126.5 (CH), 126.03 (CH), 126.00 (CH), 125.6 (CH), 125.1 (CH), 124.7 (CH), 124.2 (CH), 124.1 ( $C_q$ ), 123.89 (CH), 123.87 (CH), 123.84 ( $C_q$ ), 123.4 (CH), 120.01 (CH), 119.99 (CH), 114.9 (CH), 55.8 ( $CH_3$ ), 53.4 (CH), 53.2 (CH), 35.8 ( $C_q$ ), 34.6 ( $C_q$ ), 31.8 ( $CH_3$ ), 31.3 ( $CH_3$ ), 21.3 ( $CH_3$ ), 21.2 ( $CH_3$ ).

**MALDI-HRMS** (pos): m/z calc.  $[M]^+$  1307.42552, found  $[M]^+$  1307.42616,  $\Delta = 0.49$  ppm.

## TAA-TTC(PAZ)-PDI

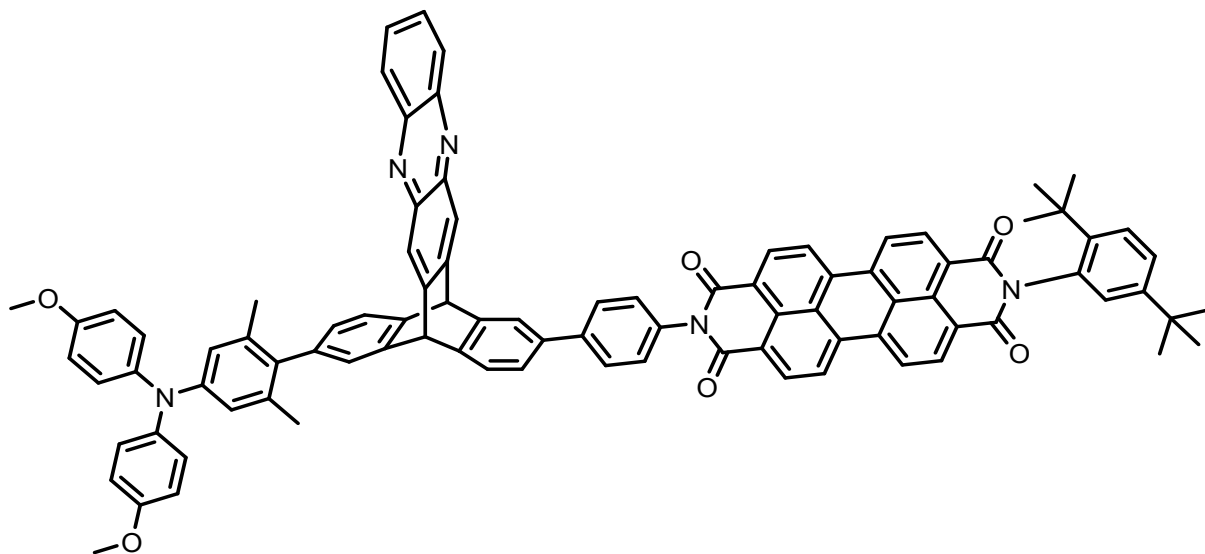

CA: [-]

Synthesis according to **GP III**.<sup>[4]</sup>

**Bpin-TTC(PAZ)-PDI** (38.0 mg, 33.5  $\mu\text{mol}$ ), **TAAMe<sub>2</sub>-Br** (27.6 mg, 66.9  $\mu\text{mol}$ ) sodium carbonate (14.2 mg, 134  $\mu\text{mol}$ ) in THF (6 ml) and water (1.5 ml). Pd(PPh<sub>3</sub>)<sub>4</sub> (1.94 mg, 1.68  $\mu\text{mol}$ ) Column chromatography (eluent: DCM/EA (10:1)). The product was dissolved in DCM and precipitated by addition of hexane.

**Yield:** 14.0 mg (10.4  $\mu\text{mol}$ , 31 %) of a red solid.

C<sub>92</sub>H<sub>69</sub>N<sub>5</sub>O<sub>6</sub> [1340.57 g/mol]

**<sup>1</sup>H-NMR** (600.1 MHz, CD<sub>2</sub>Cl<sub>2</sub>):

$\delta$  [ppm] = 8.74 (m', 8H), 8.18 (m, 2H), 8.16 (s, 1H), 8.13 (s, 1H), 7.90 (d, <sup>4</sup>J<sub>H,H</sub> = 1.5 Hz, 1H), 7.78 (m', 4H), 7.67 (d, <sup>3</sup>J<sub>H,H</sub> = 7.9 Hz, 1H), 7.63 (m', 2H), 7.51 (dd, <sup>3</sup>J<sub>H,H</sub> = 8.7 Hz, <sup>4</sup>J<sub>H,H</sub> = 2.2 Hz, 1H), 7.48 (dd, <sup>3</sup>J<sub>H,H</sub> = 7.7 Hz, <sup>4</sup>J<sub>H,H</sub> = 1.7 Hz, 1H), 7.42 (AA', 2H), 7.37 (s, 1H), 7.07 (d, <sup>4</sup>J<sub>H,H</sub> = 2.3 Hz, 1H), 7.04 (AA', 4H), 6.95 (dd, <sup>3</sup>J<sub>H,H</sub> = 7.6 Hz, <sup>4</sup>J<sub>H,H</sub> = 1.5 Hz, 1H), 6.83 (BB', 4H),

6.62 (m, 2H), 5.87 (s, 1H), 5.79 (s, 1H), 3.78 (s, 6H), 1.87 (s, 3H), 1.77 (s, 3H), 1.33 (s, 9H), 1.28 (s, 9H).

<sup>13</sup>C-NMR (150.9 MHz, CD<sub>2</sub>Cl<sub>2</sub>):

δ [ppm] = 164.9 (C<sub>q</sub>), 164.0 (C<sub>q</sub>), 156.1 (C<sub>q</sub>), 150.8 (C<sub>q</sub>), 147.8 (C<sub>q</sub>), 147.0 (C<sub>q</sub>), 146.97 (C<sub>q</sub>), 144.8 (C<sub>q</sub>), 144.6 (C<sub>q</sub>), 143.59 (C<sub>q</sub>), 143.58 (C<sub>q</sub>), 143.53 (C<sub>q</sub>), 143.45 (C<sub>q</sub>), 143.44 (C<sub>q</sub>), 141.8 (C<sub>q</sub>), 141.62 (C<sub>q</sub>), 141.57 (C<sub>q</sub>), 139.7 (C<sub>q</sub>), 139.0 (C<sub>q</sub>), 137.13 (C<sub>q</sub>), 137.05 (C<sub>q</sub>), 135.5 (C<sub>q</sub>), 135.4 (C<sub>q</sub>), 135.1 (C<sub>q</sub>), 134.5 (2 x C<sub>q</sub>), 133.6 (C<sub>q</sub>), 132.1 (CH), 132.0 (CH), 130.23 (C<sub>q</sub>), 130.17 (C<sub>q</sub>), 130.14 (CH), 130.13 (CH), 129.84 (CH), 129.81 (CH), 129.5 (CH), 129.3 (CH), 128.5 (CH), 128.3 (CH), 128.0 (CH), 127.2 (C<sub>q</sub>), 127.1 (C<sub>q</sub>), 126.8 (CH), 126.5 (CH), 125.9 (CH), 125.7 (CH), 125.0 (CH), 124.5 (CH), 124.1 (C<sub>q</sub>), 123.91 (CH), 123.88 (CH), 123.86 (C<sub>q</sub>), 123.7 (CH), 122.91 (CH), 122.88 (CH), 120.02 (CH), 120.01 (CH), 114.9 (CH), 55.8 (CH<sub>3</sub>), 53.8 (CH), 53.6 (CH), 35.8 (C<sub>q</sub>), 34.6 (C<sub>q</sub>), 31.8 (CH<sub>3</sub>), 31.3 (CH<sub>3</sub>), 21.3 (CH<sub>3</sub>), 21.2 (CH<sub>3</sub>).

**MALDI-HRMS** (pos): m/z calc. [M]<sup>+</sup> 1339.52424, found [M]<sup>+</sup> 139.52399, Δ = 0.19 ppm.<sup>7</sup>

## TTC-Ph<sub>2</sub>

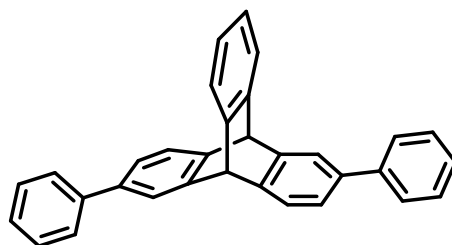

Synthesis according to literature.<sup>[4]</sup>

CA: [-]

Synthesis according to **GP III**.

**TTC-(Bpin)<sub>2</sub>** (20.0 mg, 39.5 μmol), iodobenzene (20.2 mg, 99.0 μmol), sodium carbonate (16.8 mg, 159 μmol) in THF (6 ml) and water (1.5 ml). Pd(PPh<sub>3</sub>)<sub>4</sub> (2.28 mg, 1.97 μmol). Column chromatography on silica gel (eluent: DCM/PE (50:5)).

<sup>7</sup> Peak refers to the second highest peak.

**Yield:** 10.0 mg (24.6  $\mu\text{mol}$ , 62 %) of a colourless solid.

$\text{C}_{32}\text{H}_{22}$  [406.52 g/mol]

**$^1\text{H-NMR}$**  (400.1 MHz,  $\text{CDCl}_3$ ):

$\delta$  [ppm] = 7.64 (d,  $^4J_{\text{H,H}} = 1.8$  Hz, 2H), 7.51 (m', 4H), 7.47 (d,  $^3J_{\text{H,H}} = 7.6$  Hz, 2H), 7.44 (m, 2H), 7.39 (m, 4H), 7.07 (s, 2H), 7.30 (m', 2H), 7.23 (dd,  $^3J_{\text{H,H}} = 7.6$  Hz,  $^4J_{\text{H,H}} = 1.8$  Hz, 2H), 5.53 (s, 2H).

**$^{13}\text{C-NMR}$**  (100.6 MHz,  $\text{CDCl}_3$ ):

$\delta$  [ppm] = 145.9 ( $\text{C}_q$ ), 145.2 ( $\text{C}_q$ ), 144.4 ( $\text{C}_q$ ), 141.4 ( $\text{C}_q$ ), 138.8 ( $\text{C}_q$ ), 128.8 (CH), 127.4 (CH), 127.1 (CH), 125.5 (CH), 124.3 (CH), 124.1 (CH), 123.8 (CH), 122.9 (CH), 55.1 (CH).

**APCI-MS** (pos): m/z calc.  $[\text{M}+\text{H}]^+$  407.1794, found  $[\text{M}]^+$  407.1800.

**TTC(OMe) $_2$ -Ph $_2$**

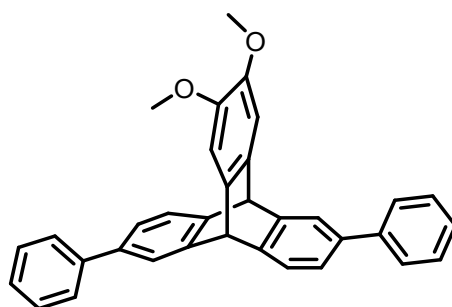

CA: [-]

Synthesis according to **GP III**.<sup>[4]</sup>

**TTC(OMe) $_2$ -(Bpin) $_2$**  (20.0 mg, 35.3  $\mu\text{mol}$ ), iodobenzene (28.8 mg, 141  $\mu\text{mol}$ ), sodium carbonate (15.0 mg, 142  $\mu\text{mol}$ ) in THF (6 ml) and water (1.5 ml).  $\text{Pd}(\text{PPh}_3)_4$  (2.04 mg, 1.77  $\mu\text{mol}$ ). Column chromatography on silica gel (eluent: DCM/PE (5:1)).

**Yield:** 12.0 mg (25.7  $\mu\text{mol}$ , 73 %) of a colourless solid.

$\text{C}_{34}\text{H}_{26}\text{O}_2$  [466.57 g/mol]

**<sup>1</sup>H-NMR** (400.1 MHz, CDCl<sub>3</sub>):

δ [ppm] = 7.62 (d, <sup>4</sup>J<sub>H,H</sub> = 1.8 Hz, 2H), 7.51 (m', 4H), 7.46 (d, <sup>3</sup>J<sub>H,H</sub> = 7.5 Hz, 2H), 7.39 (m', 4H), 7.30 (m, 2H), 7.22 (dd, <sup>3</sup>J<sub>H,H</sub> = 7.5 Hz, <sup>4</sup>J<sub>H,H</sub> = 1.8 Hz, 2H), 7.07 (s, 2H), 5.45 (s, 2H), 3.85 (s, 6H).

**<sup>13</sup>C-NMR** (100.6 MHz, CDCl<sub>3</sub>):

δ [ppm] = 146.34 (C<sub>q</sub>), 146.30 (C<sub>q</sub>), 144.8 (C<sub>q</sub>), 141.4 (C<sub>q</sub>), 138.7 (C<sub>q</sub>), 137.9 (C<sub>q</sub>), 128.8 (CH), 127.4 (CH), 127.1 (CH), 124.2 (CH), 123.8 (CH), 122.7 (CH), 108.7 (CH), 56.4 (CH<sub>3</sub>), 53.7 (CH).

**APCI-MS** (pos): m/z calc. [M+H]<sup>+</sup> 467.2006, found [M]<sup>+</sup> 467.2014.

### Ph-TTC(OMe)<sub>2</sub>-PDI

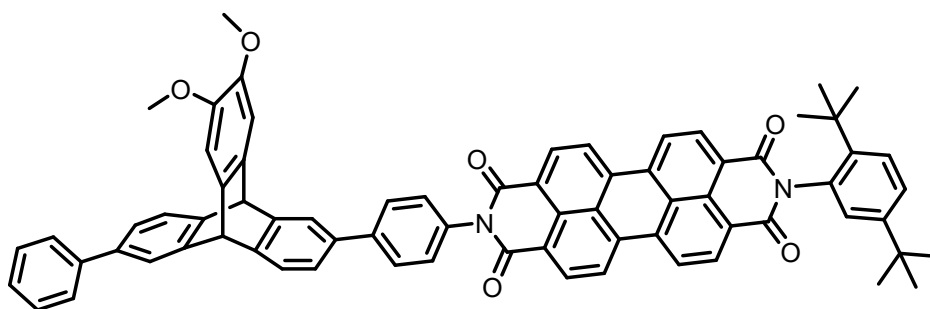

CA: [-]

Synthesis according to **GP III**.<sup>[4]</sup>

**(Bpin)-TTC(OMe)<sub>2</sub>-PDI** (20.0 mg, 18.3 μmol), iodobenzene (7.45 mg, 36.5 μmol), sodium carbonate (7.74 mg, 73.0 μmol) in THF (6 ml) and water (1.5 ml). Pd(PPh<sub>3</sub>)<sub>4</sub> (1.06 mg, 0.917 μmol). Column chromatography on silica gel (eluent: DCM/EA (10:1), Toluene/EA (7:1)).

**Yield:** 10.0 mg (9.59 μmol, 52 %) of a red solid.

C<sub>72</sub>H<sub>54</sub>N<sub>2</sub>O<sub>6</sub> [1043.21 g/mol]

**<sup>1</sup>H-NMR** (400.1 MHz, CDCl<sub>3</sub>):

$\delta$  [ppm] = 8.73 (m', 8H), 7.70 (m', 3H), 7.65 (d,  $^4J_{\text{H,H}} = 1.7$  Hz, 1H), 7.61 (d,  $^3J_{\text{H,H}} = 8.6$  Hz, 1H), 7.51 (m', 5H), 7.40 (m', 4H), 7.30 (m', 2H), 7.24 (dd,  $^3J_{\text{H,H}} = 7.6$  Hz,  $^4J_{\text{H,H}} = 1.7$  Hz, 1H), 7.10 (s, 1H), 7.09 (s, 1H), 7.06 (dd,  $^4J_{\text{H,H}} = 2.2$  Hz, 1H), 5.49 (s, 1H), 5.48 (s, 1H), 3.88 (s, 3H), 3.87 (s, 3H), 1.33 (s, 9H), 1.30 (s, 9H).

$^{13}\text{C-NMR}$  (100.6 MHz,  $\text{CDCl}_3$ ):

$\delta$  [ppm] = 164.5 ( $\text{C}_q$ ), 163.8 ( $\text{C}_q$ ), 150.3 ( $\text{C}_q$ ), 146.4 ( $\text{C}_q$ ), 146.35 ( $\text{C}_q$ ), 146.33 ( $\text{C}_q$ ), 146.30 ( $\text{C}_q$ ), 145.2 ( $\text{C}_q$ ), 144.8 ( $\text{C}_q$ ), 143.8 ( $\text{C}_q$ ), 142.2 ( $\text{C}_q$ ), 141.4 ( $\text{C}_q$ ), 138.7 ( $\text{C}_q$ ), 137.94 ( $\text{C}_q$ ), 137.87 ( $\text{C}_q$ ), 137.82 ( $\text{C}_q$ ), 135.3 ( $\text{C}_q$ ), 135.0 ( $\text{C}_q$ ), 134.1 ( $\text{C}_q$ ), 132.7 ( $\text{C}_q$ ), 132.07 (CH), 132.04 (CH), 130.00 ( $\text{C}_q$ ), 129.96 ( $\text{C}_q$ ), 129.0 (CH), 128.9 (CH), 128.8 (CH), 128.5 (CH), 127.9 (CH), 127.4 (CH), 127.3 (CH), 127.2 (CH), 126.91 ( $\text{C}_q$ ), 126.85 ( $\text{C}_q$ ), 126.6 (CH), 124.5 (CH), 124.3 (CH), 123.9 ( $\text{C}_q$ ), 123.87 (CH), 123.84 (CH), 123.545 ( $\text{C}_q$ ), 123.53 (CH), 123.45 (CH), 122.8 (CH), 122.7 (CH), 108.7 (CH), 56.4 (2 x CH), 53.8 ( $\text{CH}_3$ ), 53.7 ( $\text{CH}_3$ ), 35.7 ( $\text{C}_q$ ), 34.4 ( $\text{C}_q$ ), 31.9 ( $\text{CH}_3$ ), 31.4 ( $\text{CH}_3$ ).

**MALDI-MS** (pos): m/z calc.  $[\text{M}+\text{H}]^+$  1042.397639.

### TTCMe<sub>2</sub>-Ph<sub>2</sub>

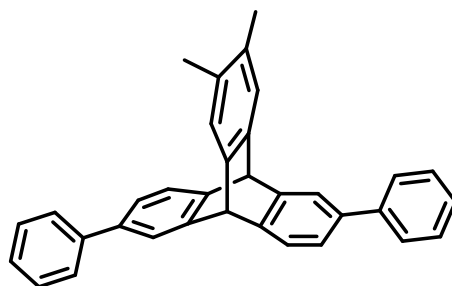

CA: [-]

Synthesis according to **GP III**.<sup>[4]</sup>

**TTCMe<sub>2</sub>-(Bpin)<sub>2</sub>** (20.0 mg, 37.4  $\mu\text{mol}$ ), iodobenzene (22.9 mg, 112  $\mu\text{mol}$ ), sodium carbonate (15.9 mg, 150  $\mu\text{mol}$ ) in THF (6 ml) and water (1.5 ml).  $\text{Pd}(\text{PPh}_3)_4$  (2.16 mg, 1.87  $\mu\text{mol}$ ). Column chromatography on silica gel (eluent: DCM/PE (1:8)).

**Yield:** 10.0 mg (23.0  $\mu\text{mol}$ , 61 %) of a colourless solid.

$\text{C}_{34}\text{H}_{26}$  [434.57 g/mol]



**<sup>1</sup>H-NMR** (400.1 MHz, CDCl<sub>3</sub>):

δ [ppm] = 7.61 (d, <sup>4</sup>J<sub>H,H</sub> = 1.8 Hz, 2H), 7.49 (m', 4H), 7.44 (d, <sup>3</sup>J<sub>H,H</sub> = 7.7 Hz, 2H), 7.38 (m', 4H), 7.29 (m, 2H), 7.24 (s, 2H), 7.20 (dd, <sup>3</sup>J<sub>H,H</sub> = 7.7 Hz, <sup>4</sup>J<sub>H,H</sub> = 1.8 Hz, 2H), 5.46 (s, 2H), 2.18 (s, 6H).

**<sup>13</sup>C-NMR** (100.6 MHz, CDCl<sub>3</sub>):

δ [ppm] = 146.2 (C<sub>q</sub>), 144.7 (C<sub>q</sub>), 142.8 (C<sub>q</sub>), 141.6 (C<sub>q</sub>), 138.7 (C<sub>q</sub>), 133.4 (C<sub>q</sub>), 128.8 (CH), 127.4 (CH), 127.1 (CH), 125.3 (CH), 124.2 (CH), 123.9 (CH), 122.8 (CH), 53.6 (CH), 19.7 (CH<sub>3</sub>).

**TTCCl<sub>2</sub>-Ph<sub>2</sub>**

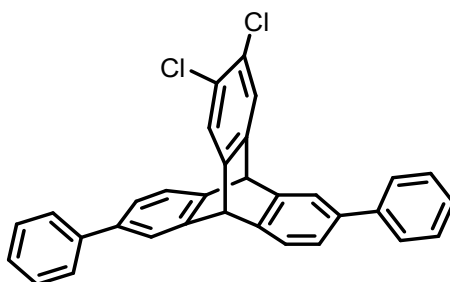

CA: [-]

Synthesis according to **GP III**.<sup>[4]</sup>

**TTCCl<sub>2</sub>-(Bpin)<sub>2</sub>** (20.0 mg, 34.8 μmol), iodobenzene (17.7 mg, 86.8 μmol) sodium carbonate (14.7 mg, 139 μmol) in THF (6 ml) and water (1.5 ml). Pd(PPh<sub>3</sub>)<sub>4</sub> (2.01 mg, 1.74 μmol) Column chromatography on silica gel (eluent: DCM/PE (1:5)).

**Yield:** 15.0 mg (31.6 μmol, 91 %) of a colourless solid.

C<sub>32</sub>H<sub>20</sub>Cl<sub>2</sub> [475.41 g/mol]

**<sup>1</sup>H-NMR** (400.1 MHz, CDCl<sub>3</sub>):

$\delta$  [ppm] = 7.39 (d,  $^4J_{H,H} = 1.8$  Hz, 2H), 7.26 (m', 5H), 7.23 (d,  $^3J_{H,H} = 7.6$  Hz, 2H), 7.16 (m', 4H), 7.07 (m', 2H), 7.02 (m', 3H), 5.23 (s, 2H).

$^{13}\text{C-NMR}$  (100.6 MHz,  $\text{CDCl}_3$ ):

$\delta$  [ppm] = 145.3 ( $\text{C}_q$ ), 144.9 ( $\text{C}_q$ ), 143.3 ( $\text{C}_q$ ), 141.1 ( $\text{C}_q$ ), 139.3 ( $\text{C}_q$ ), 128.9 (CH), 128.7 ( $\text{C}_q$ ), 127.36 (CH), 127.35 (CH), 125.8 (CH), 124.7 (CH), 124.3 (CH), 123.1 (CH), 53.1 (CH).

**APCI-MS** (pos): m/z calc.  $[\text{M}+\text{H}]^+$  475.1015, found  $[\text{M}+\text{H}]^+$  475.1019.

### TTC(PAZ)-Ph<sub>2</sub>

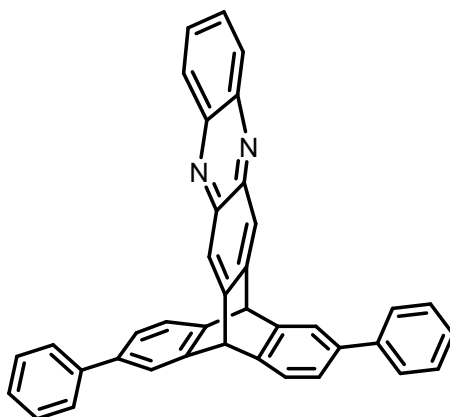

CA: [-]

Synthesis according to **GP III**.<sup>[4]</sup>

**TTC(PAZ)-(Bpin)<sub>2</sub>** (23.0 mg, 37.8  $\mu\text{mol}$ ), iodobenzene (30.9 mg, 151  $\mu\text{mol}$ ), sodium carbonate (20.0 mg, 189  $\mu\text{mol}$ ) in THF (6 ml) and water (1.5 ml).  $\text{Pd}(\text{PPh}_3)_4$  (2.18 mg, 1.89  $\mu\text{mol}$ ). Column chromatography on silica gel (eluent: DCM).

**Yield:** 14.0 mg (27.5  $\mu\text{mol}$ , 73 %) of a yellow solid.

$\text{C}_{38}\text{H}_{24}\text{N}_2$  [508.61 g/mol]

$^1\text{H-NMR}$  (400.1 MHz,  $\text{CDCl}_3$ ):

$\delta$  [ppm] = 8.19 (m, 2H), 8.14 (s, 2H), 7.77 (m', 4H), 7.60 (d,  $^3J_{H,H} = 7.8$  Hz, 2H), 7.53 (m', 4H), 7.41 (m', 4H), 7.33 (m', 4H), 5.78 (s, 2H).

**<sup>13</sup>C-NMR** (100.6 MHz, CDCl<sub>3</sub>):

δ [ppm] = 146.4 (C<sub>q</sub>), 143.9 (C<sub>q</sub>), 143.2 (C<sub>q</sub>), 143.1 (C<sub>q</sub>), 142.3 (C<sub>q</sub>), 141.1 (C<sub>q</sub>), 139.9 (C<sub>q</sub>), 130.0 (CH), 129.6 (CH), 128.9 (CH), 127.42 (CH), 127.38 (CH), 125.4 (CH), 124.7 (CH), 123.4 (CH), 122.7 (CH), 53.5 (CH).

**APCI-MS** (pos): m/z calc. [M+H]<sup>+</sup> 509.2012, found [M+H]<sup>+</sup> 509.2008.

### 1.5. NMR spectra of all triads and precursors

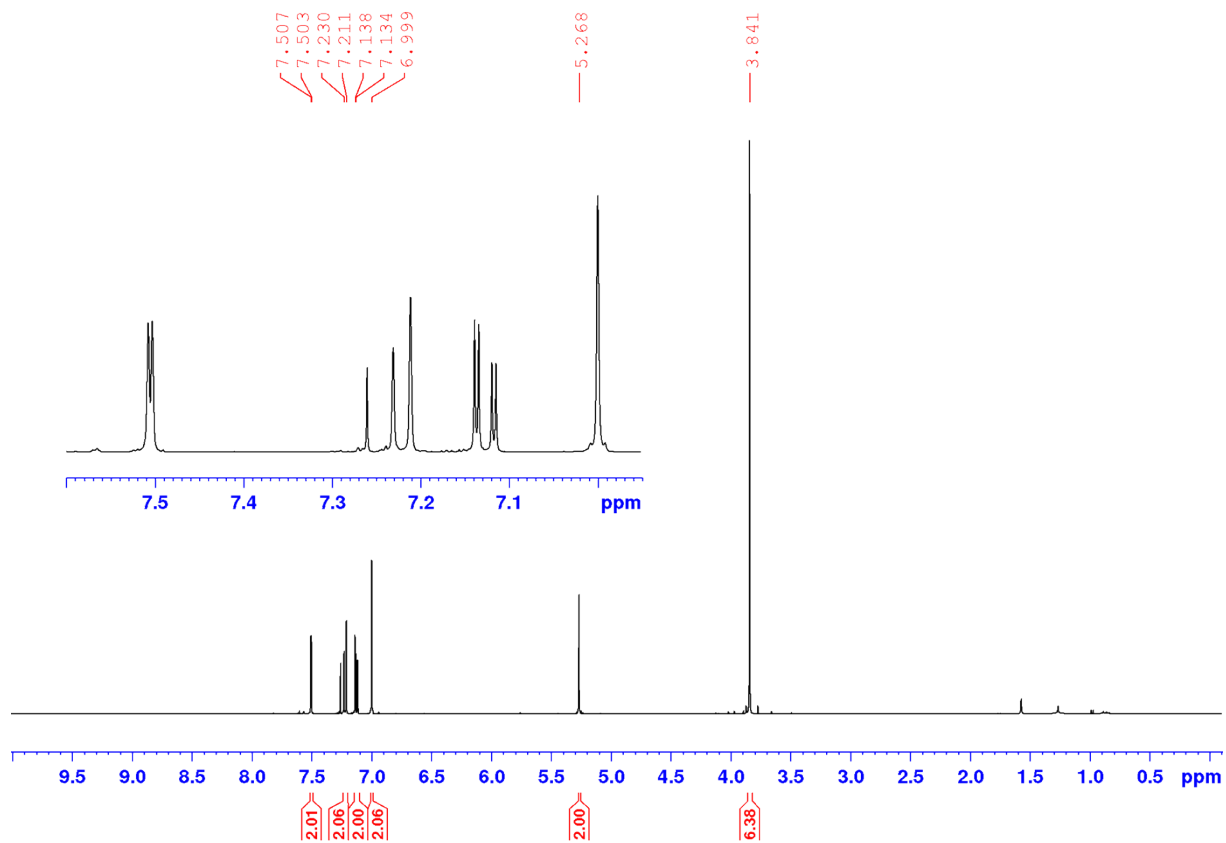

Fig S1: <sup>1</sup>H-NMR: TTC(OMe)<sub>2</sub>-(Br)<sub>2</sub> (CDCl<sub>3</sub>, 400.1 MHz).

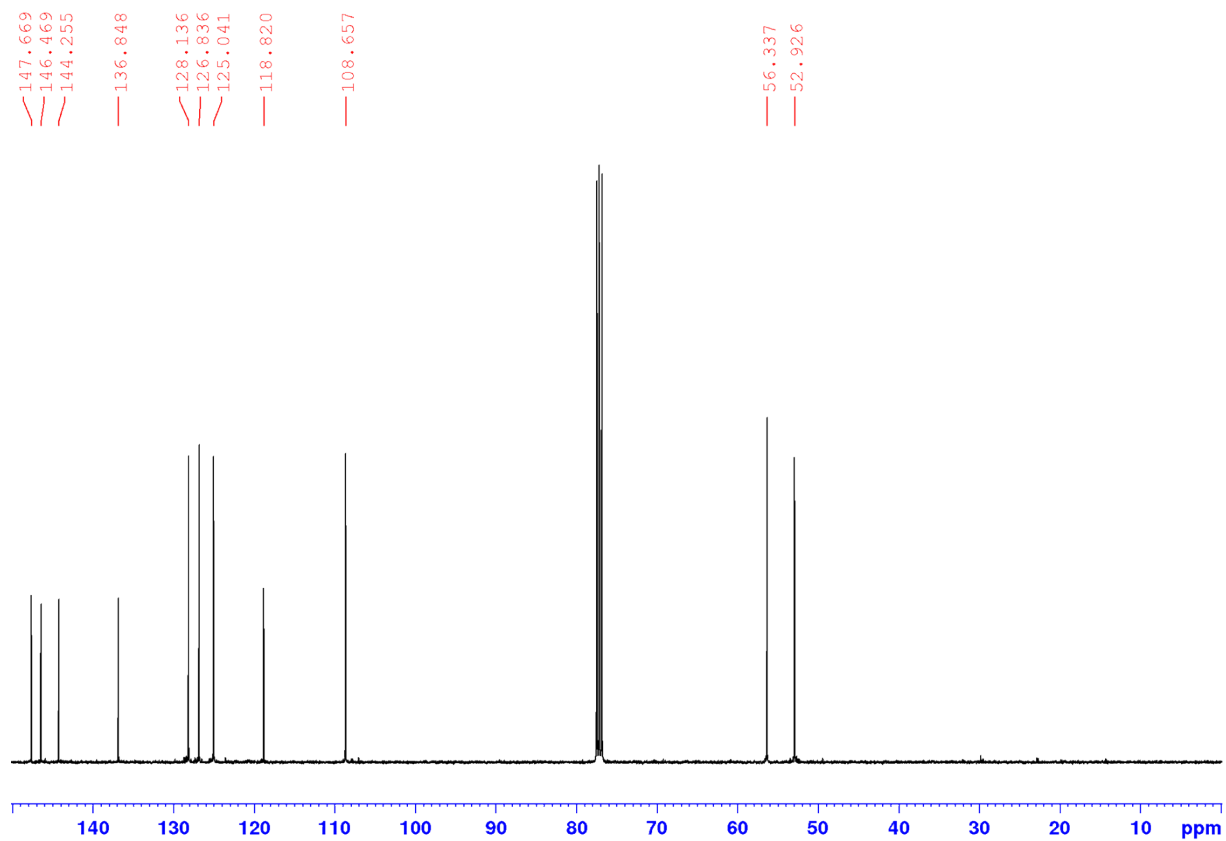

Fig S2: <sup>13</sup>C-NMR: TTC(OMe)<sub>2</sub>-(Br)<sub>2</sub> (CDCl<sub>3</sub>, 100.6 MHz).

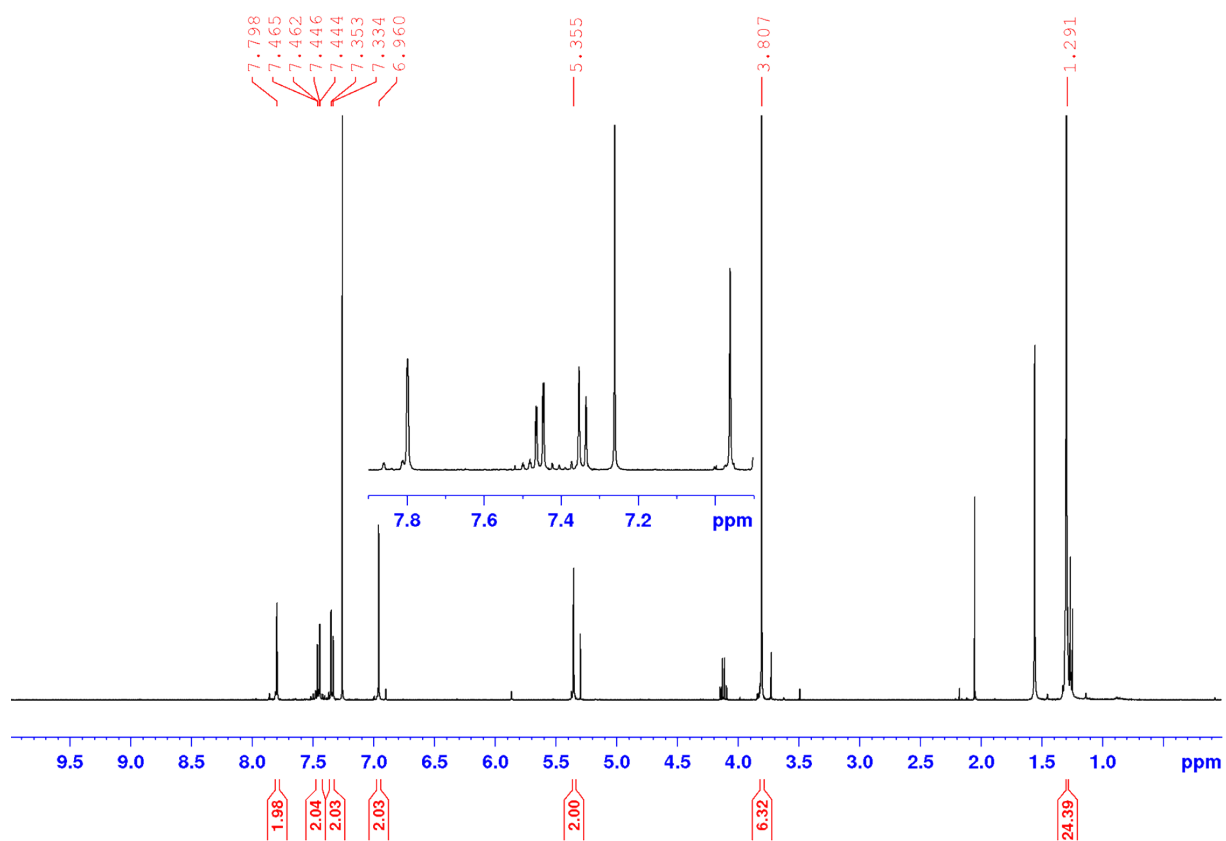

**Fig S3:** <sup>1</sup>H-NMR: TTC(OMe)<sub>2</sub>-(Bpin)<sub>2</sub> (CDCl<sub>3</sub>, 400.1 MHz). Peaks of ethyl acetate (1.26, 2.06, 4.12).

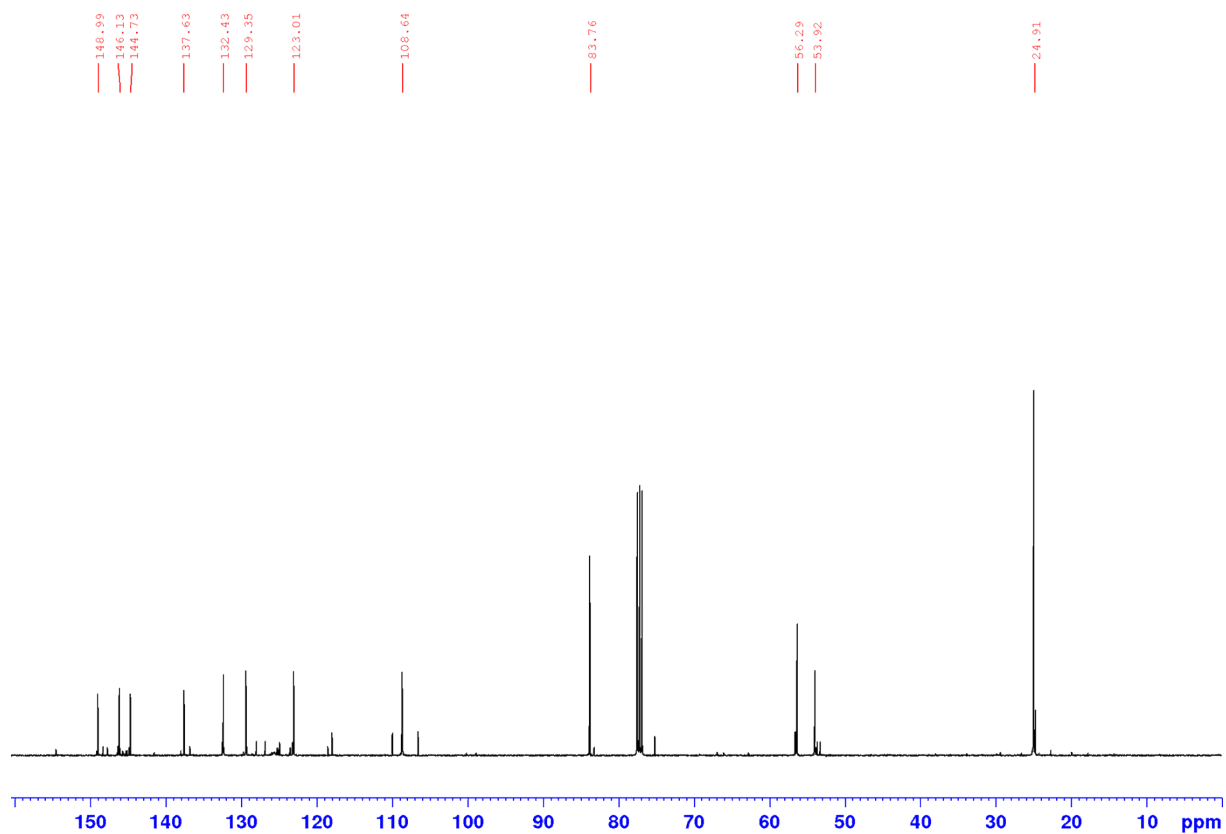

**Fig S4:** <sup>13</sup>C-NMR: TTC(OMe)<sub>2</sub>-(Bpin)<sub>2</sub> (CDCl<sub>3</sub>, 100.6 MHz).

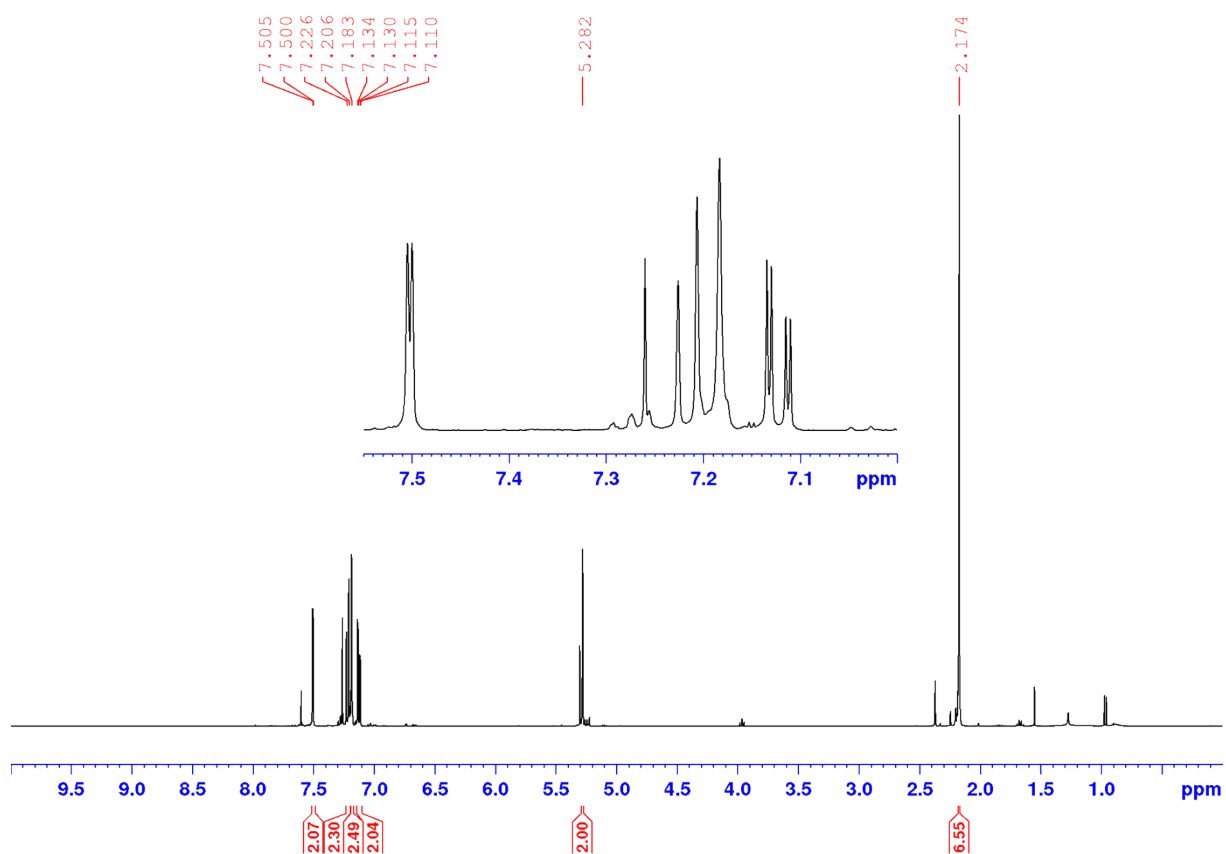

Fig S5:  $^1\text{H-NMR}$ :  $\text{TTC}(\text{Me})_2\text{-(Br)}_2$  ( $\text{CDCl}_3$ , 400.1 MHz).

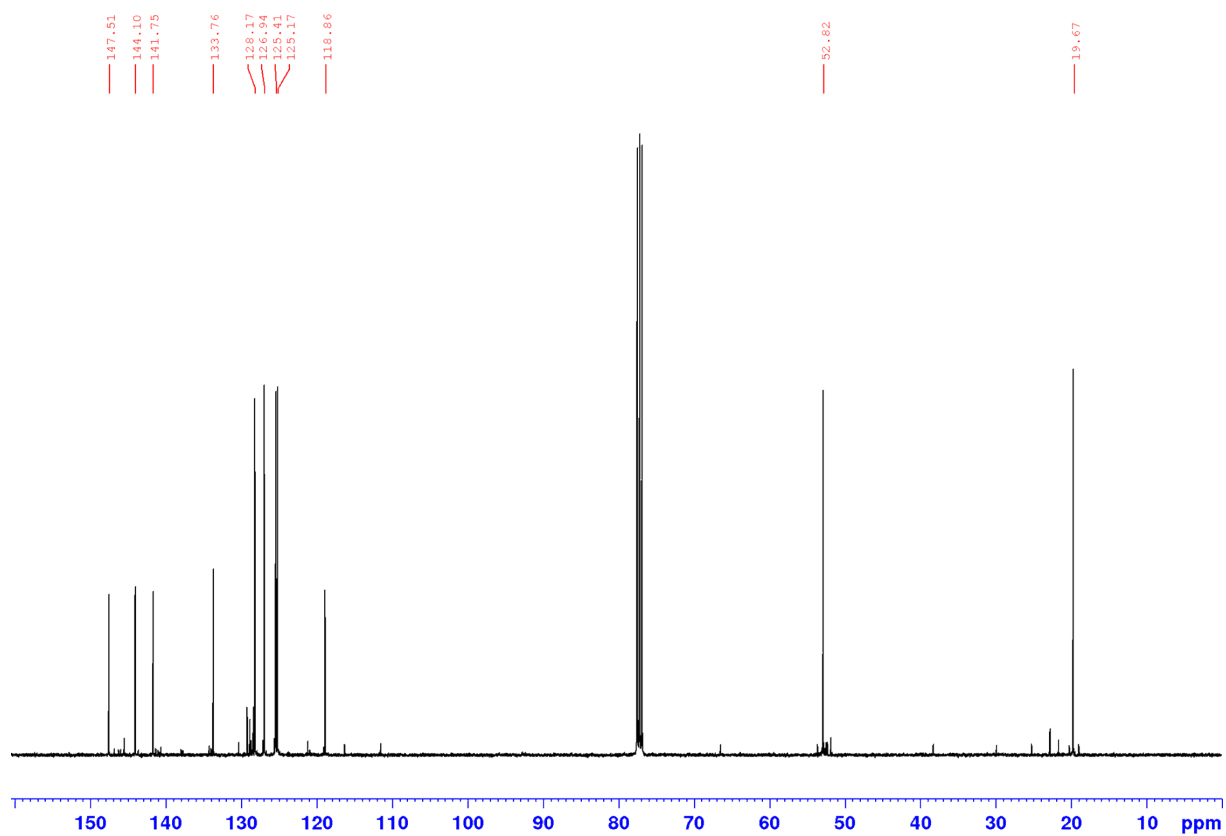

Fig S6:  $^{13}\text{C-NMR}$ :  $\text{TTC}(\text{Me})_2\text{-(Br)}_2$  ( $\text{CDCl}_3$ , 100.6 MHz).

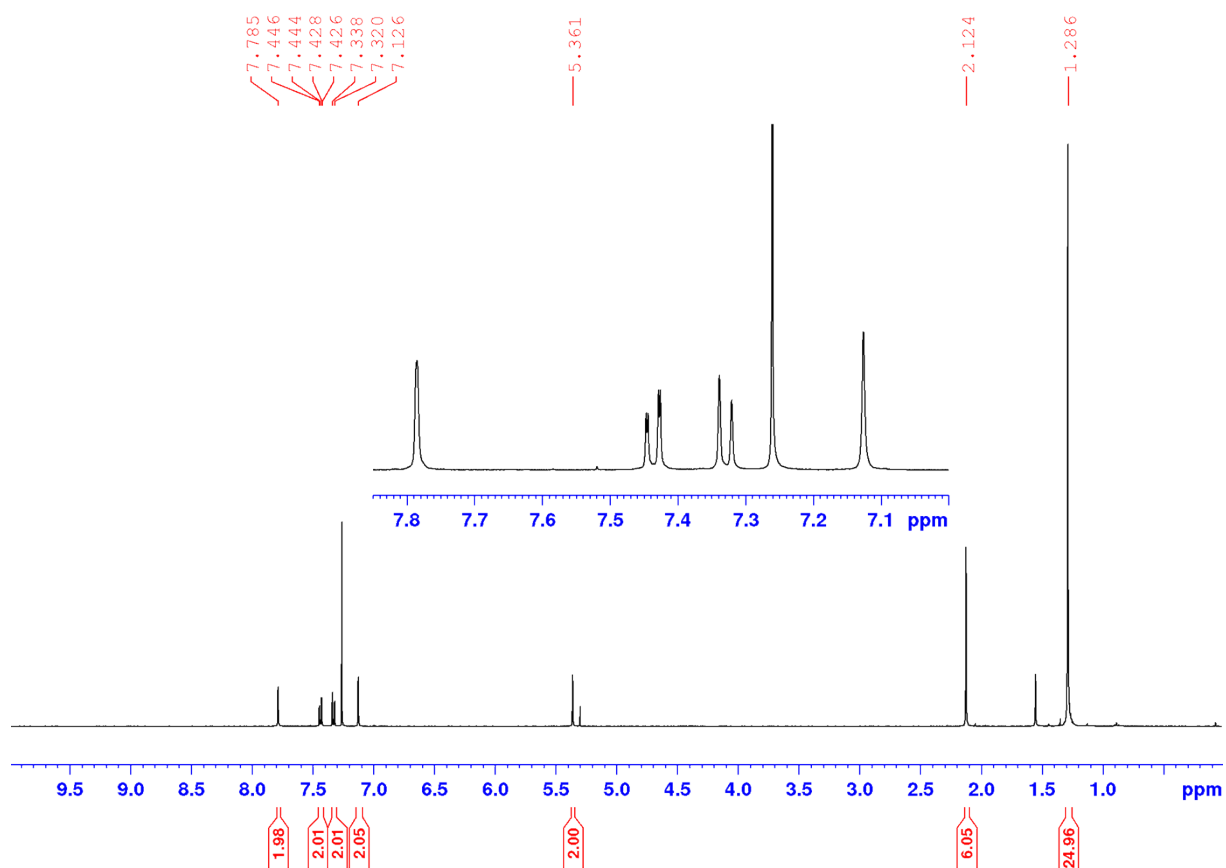

Fig S7:  $^1\text{H-NMR}$ :  $\text{TTC}(\text{Me})_2\text{-(Bpin)}_2$  ( $\text{CDCl}_3$ , 400.1 MHz).

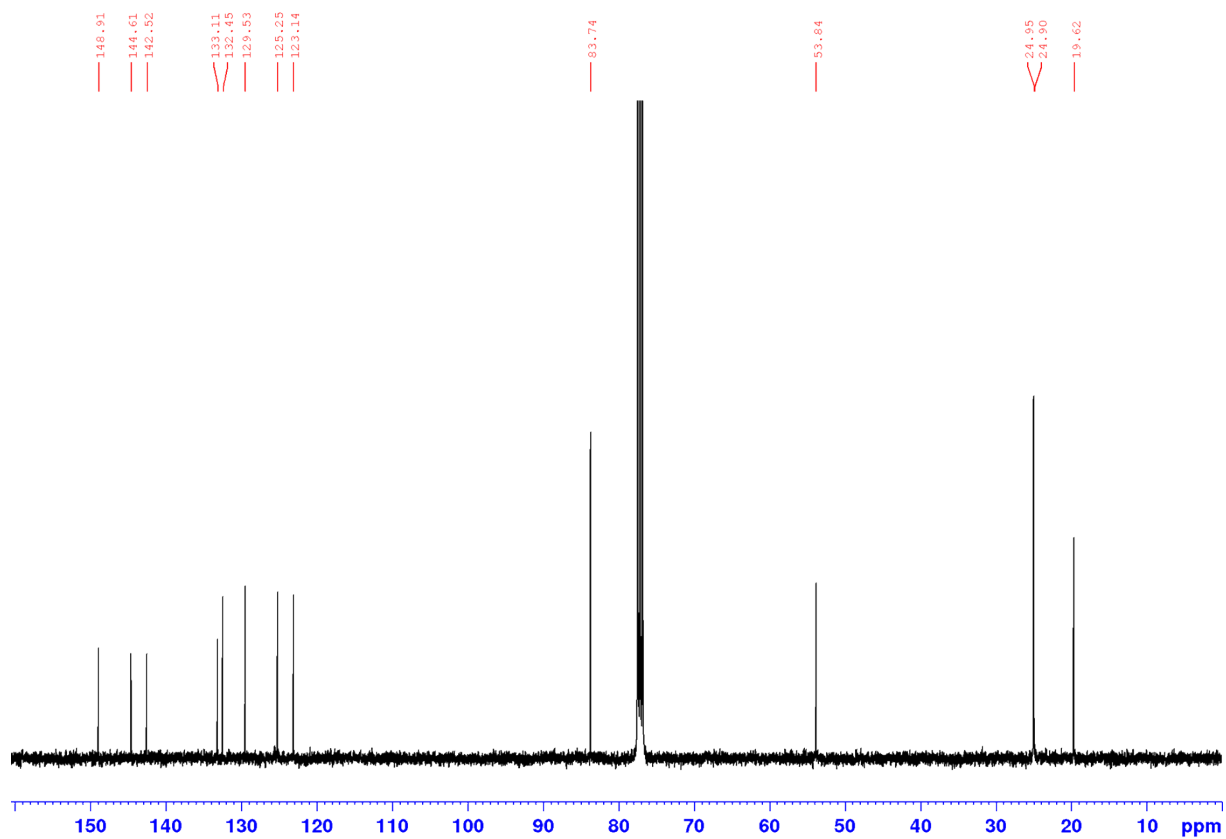

Fig S8:  $^{13}\text{C-NMR}$ :  $\text{TTC}(\text{Me})_2\text{-(Bpin)}_2$  ( $\text{CDCl}_3$ , 100.6 MHz).

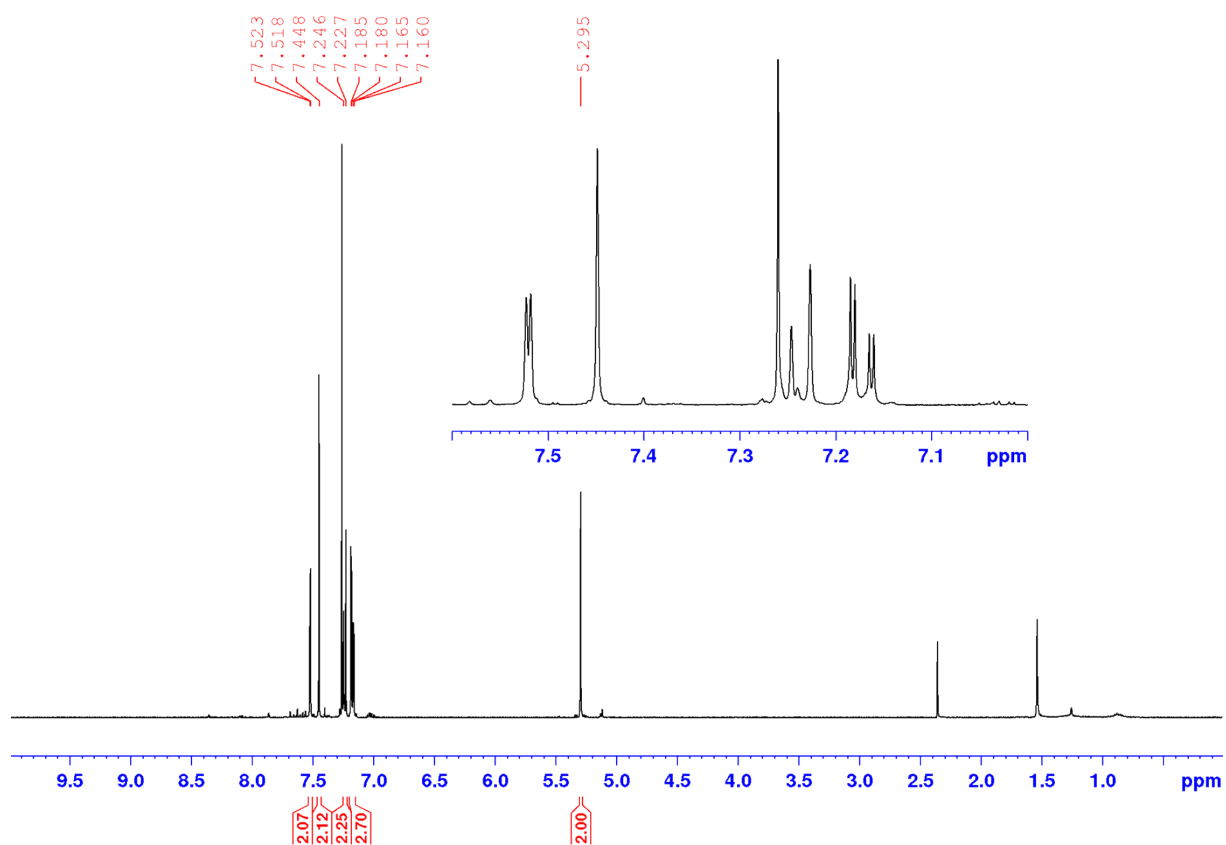

**Fig S9:**  $^1\text{H-NMR}$ :  $\text{TTC}(\text{Cl})_2(\text{Br})_2$  ( $\text{CDCl}_3$ , 400.1 MHz).

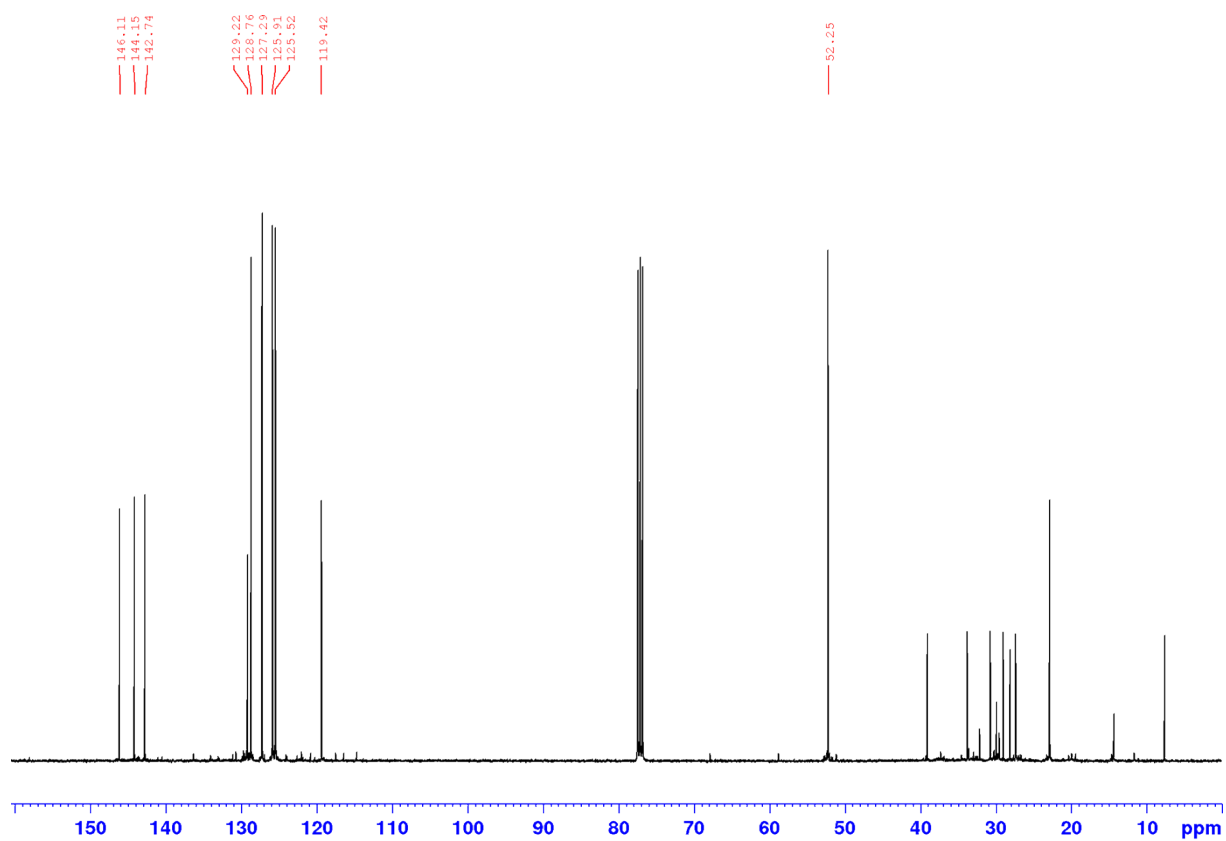

**Fig S10:**  $^{13}\text{C-NMR}$ :  $\text{TTC}(\text{Cl})_2(\text{Br})_2$  ( $\text{CDCl}_3$ , 100.6 MHz). Peaks between 0-40 ppm are from hexanes.



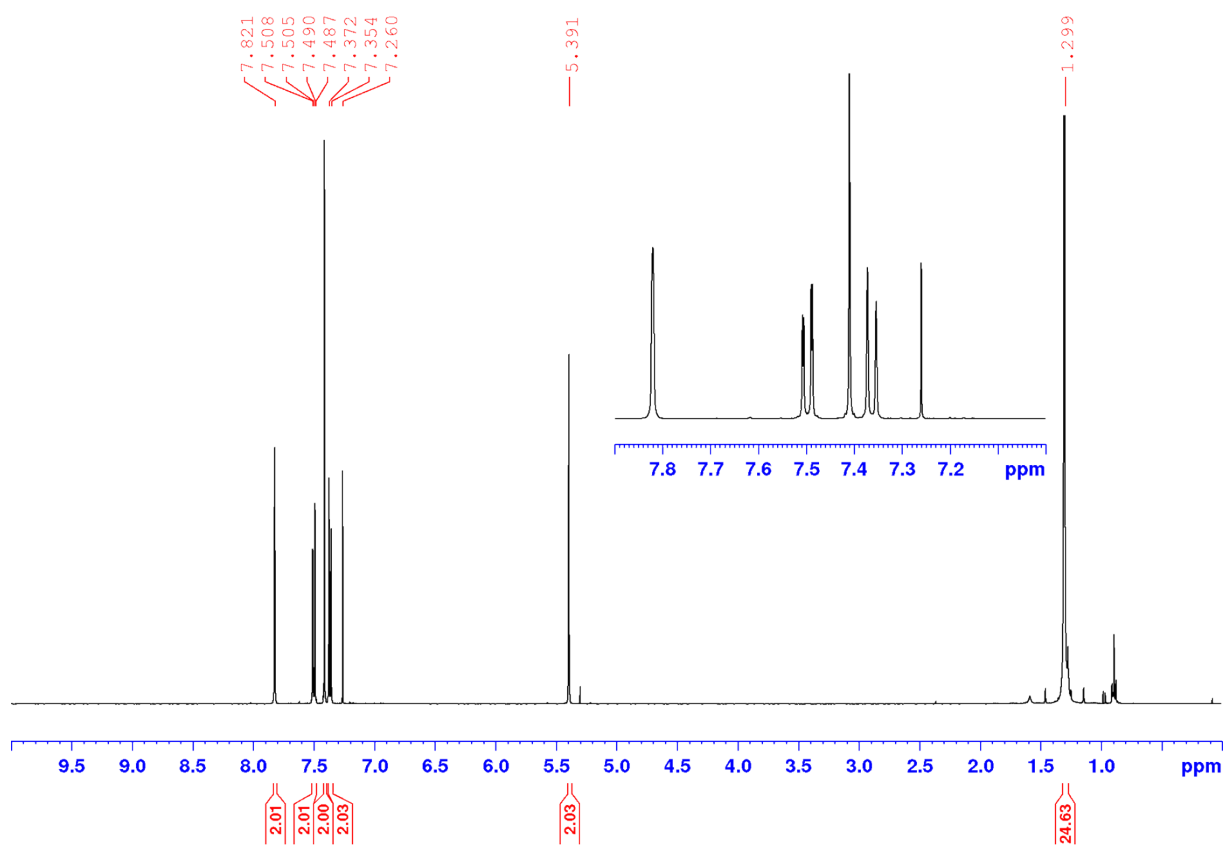

Fig S11:  $^1\text{H-NMR}$ :  $\text{TTC}(\text{Cl})_2\text{-(Bpin)}_2$  ( $\text{CDCl}_3$ , 400.1 MHz).

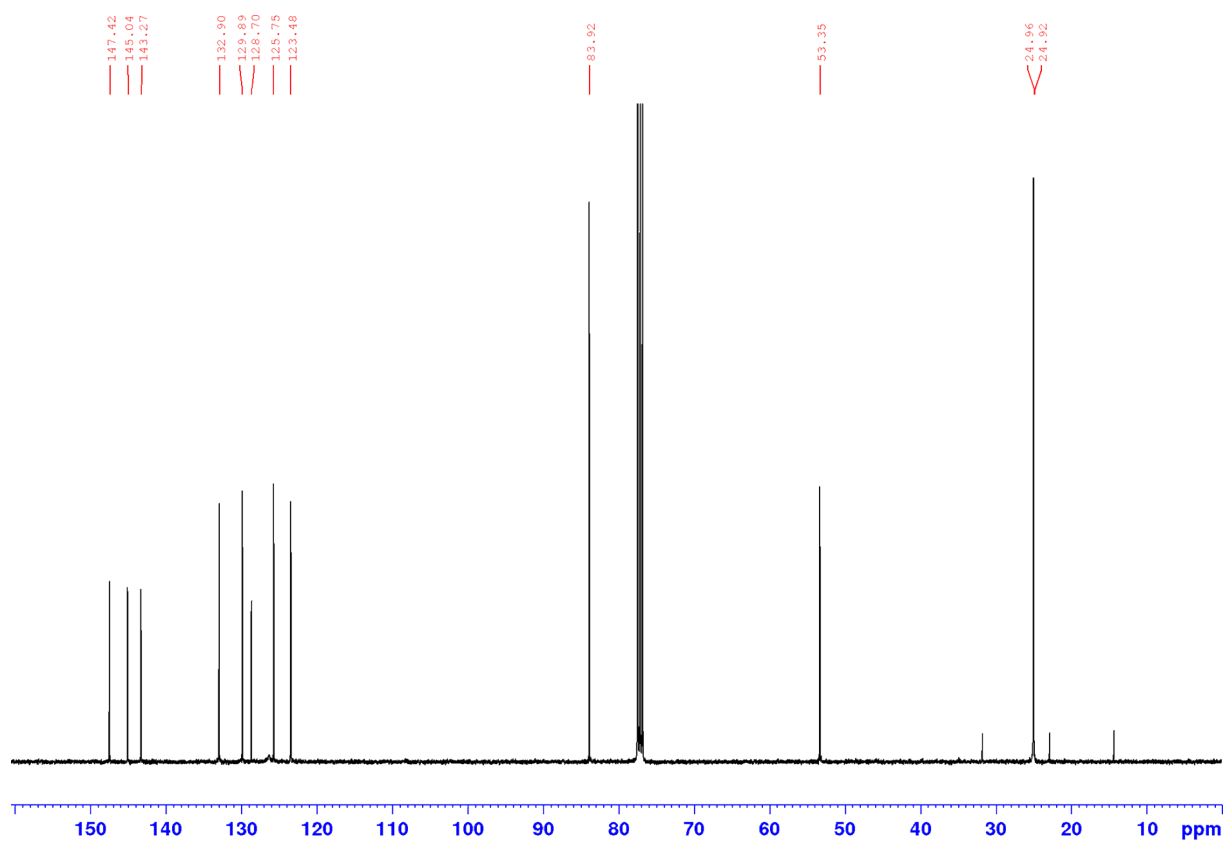

Fig S12:  $^{13}\text{C-NMR}$ :  $\text{TTC}(\text{Cl})_2\text{-(Bpin)}_2$  ( $\text{CDCl}_3$ , 100.6 MHz).

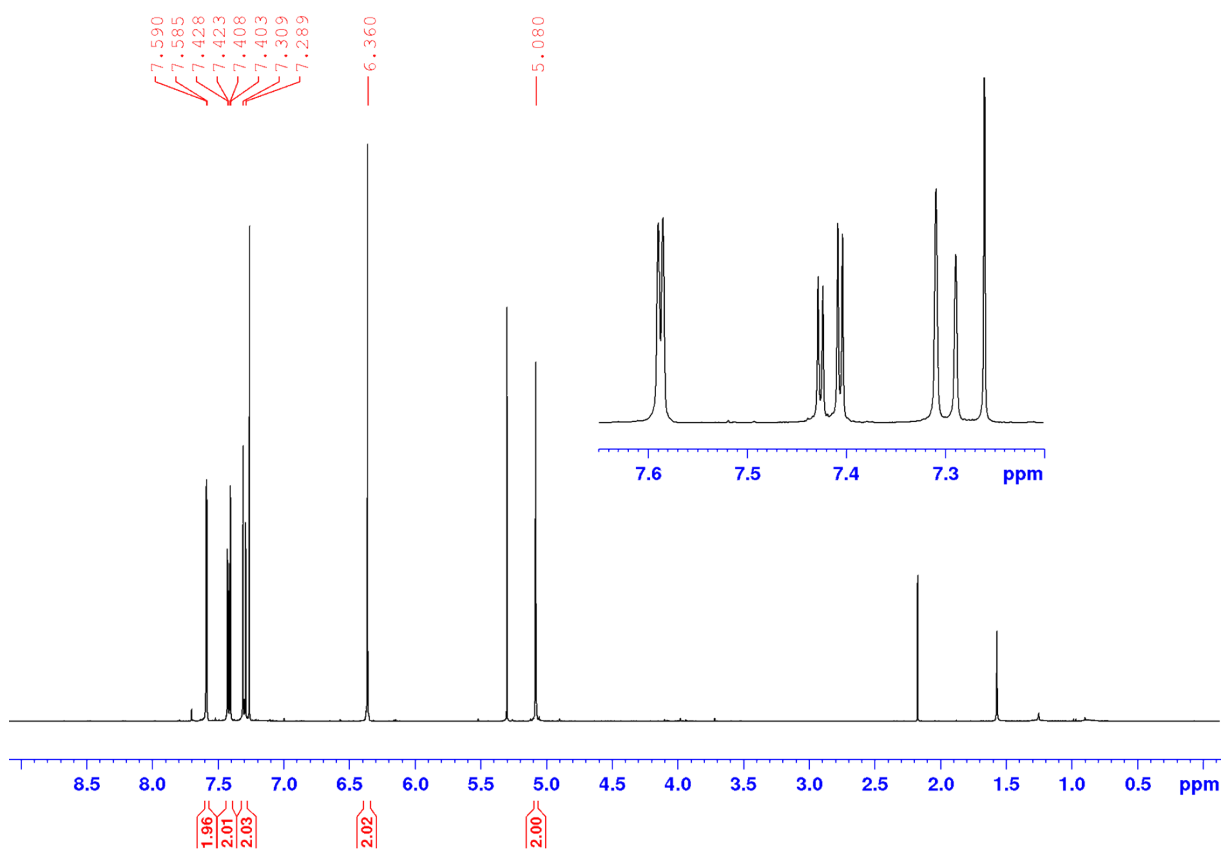

**Fig S13:**  $^1\text{H-NMR}$ :  $\text{TTCO}_2\text{-(Br)}_2$  ( $\text{CDCl}_3$ , 400.1 MHz). Acetone (2.17 ppm).

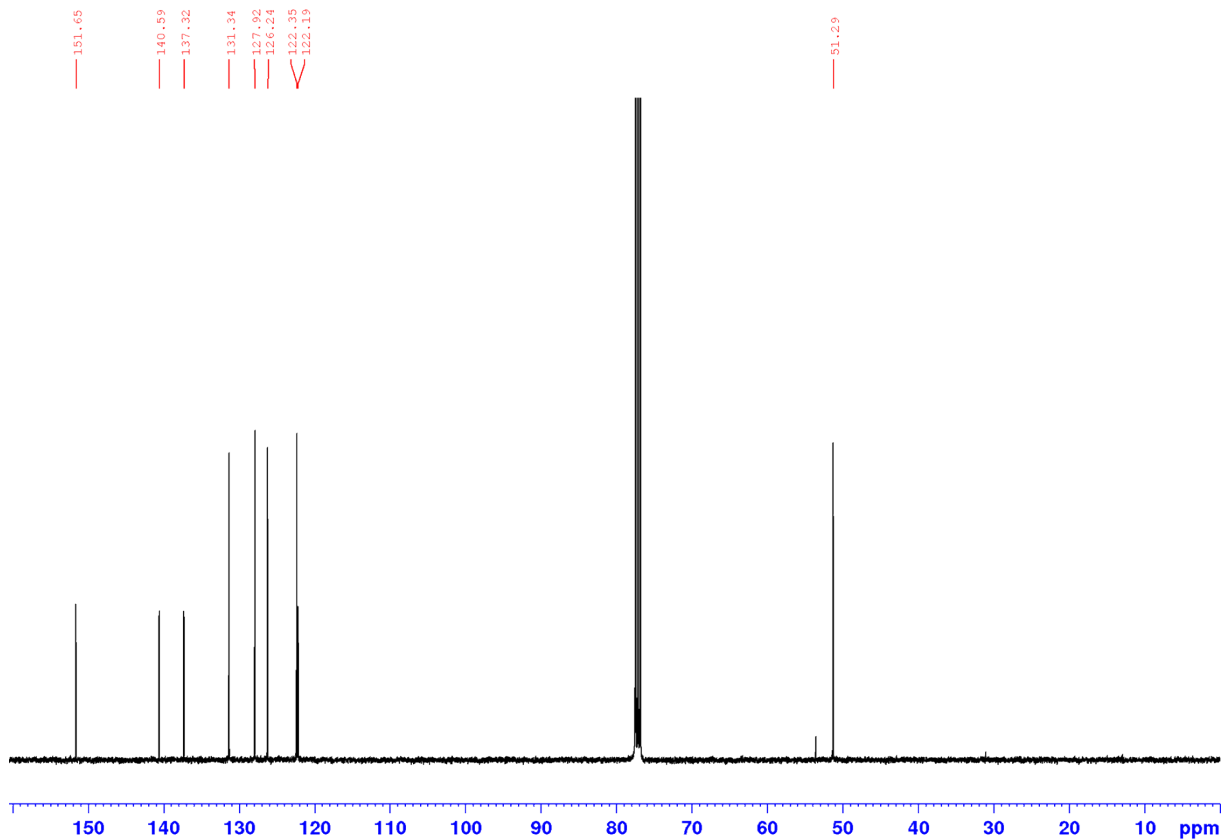

**Fig S14:**  $^{13}\text{C-NMR}$ :  $\text{TTCO}_2\text{-(Br)}_2$  ( $\text{CDCl}_3$ , 100.6 MHz).

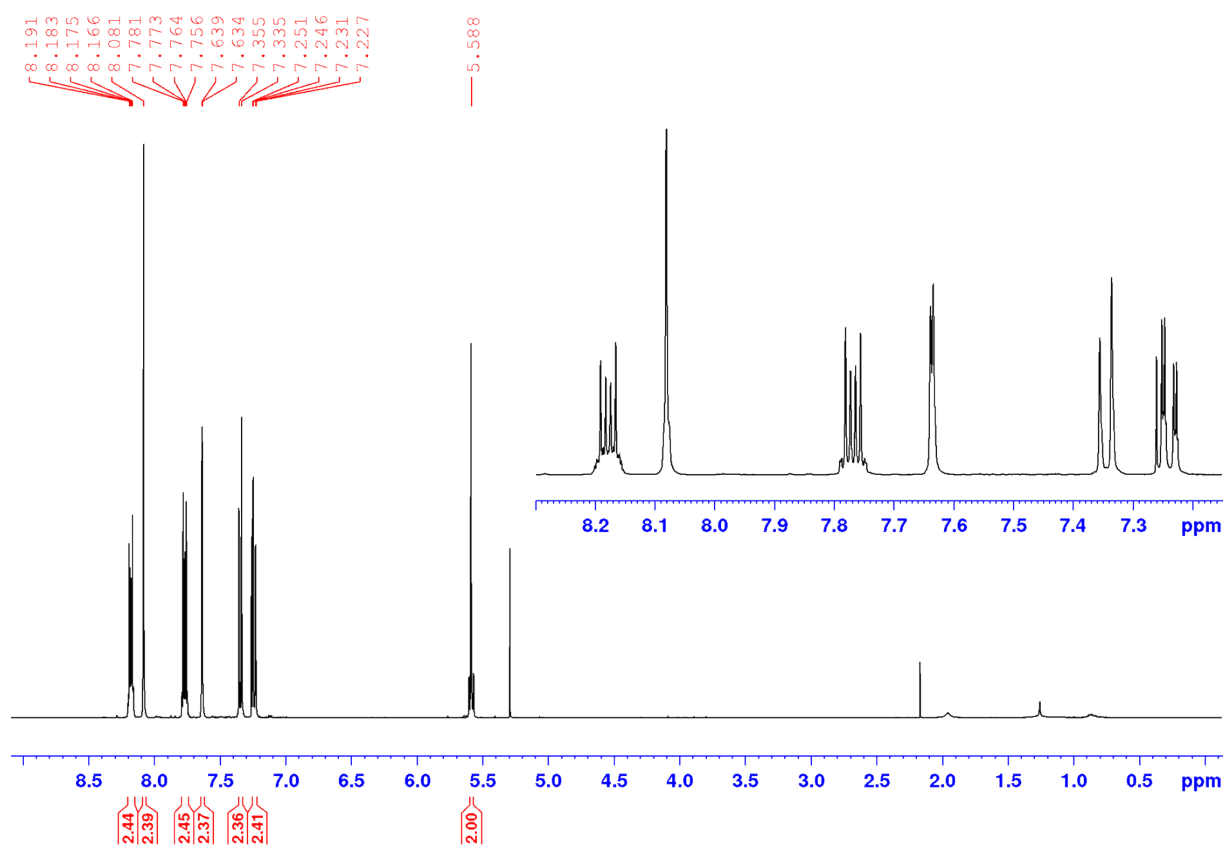

Fig S15:  $^1\text{H-NMR}$ : TTC(PAZ)-(Br) $_2$  ( $\text{CDCl}_3$ , 400.1 MHz).

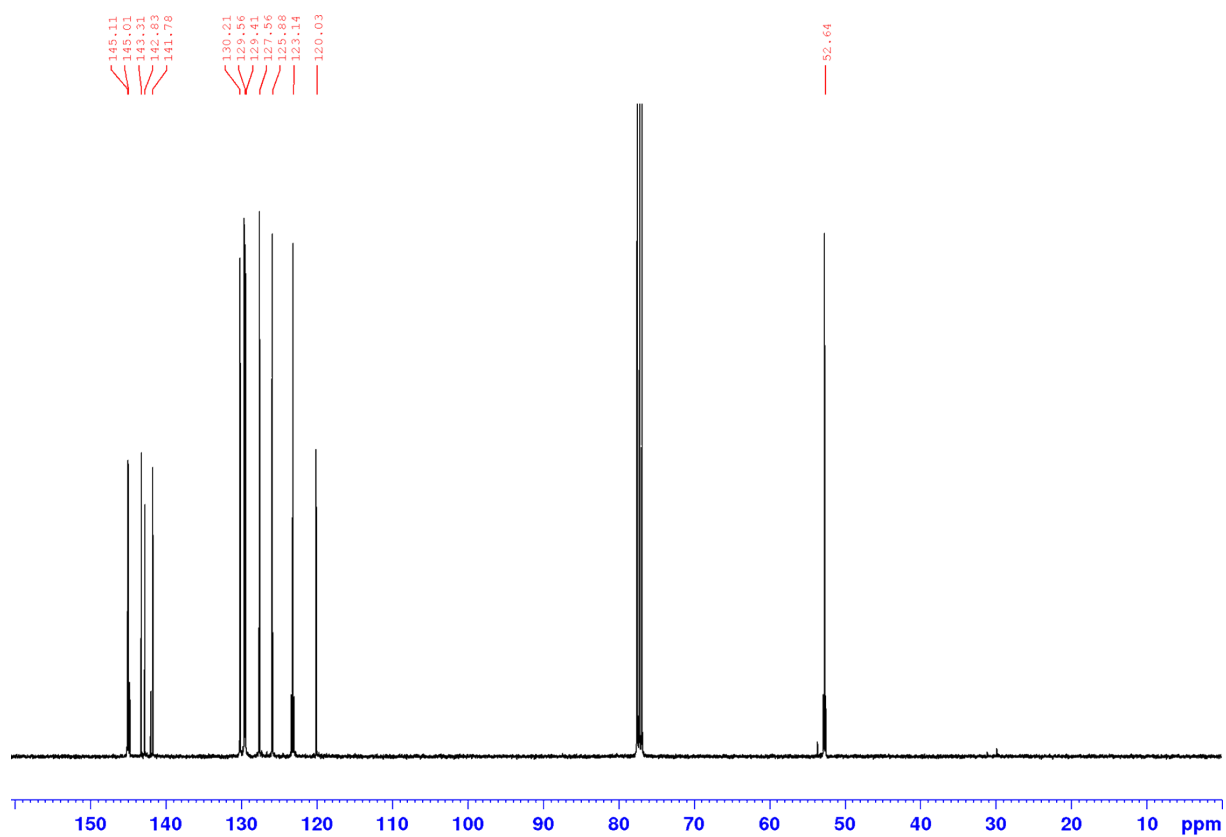

Fig S16:  $^{13}\text{C-NMR}$ : TTC(PAZ)-(Br) $_2$  ( $\text{CDCl}_3$ , 100.6 MHz).

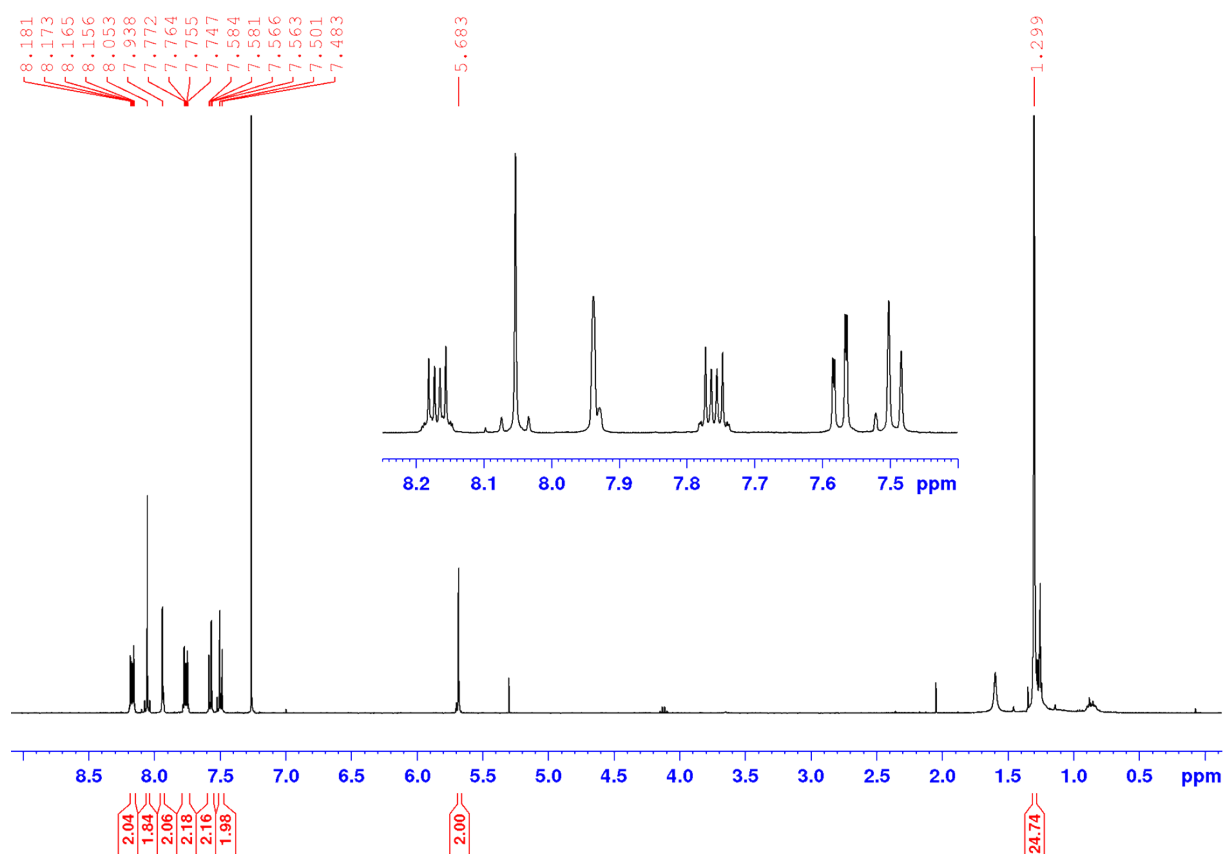

Fig S17:  $^1\text{H-NMR}$ : TTC(PAZ)-(Bpin) $_2$  ( $\text{CDCl}_3$ , 400.1 MHz).

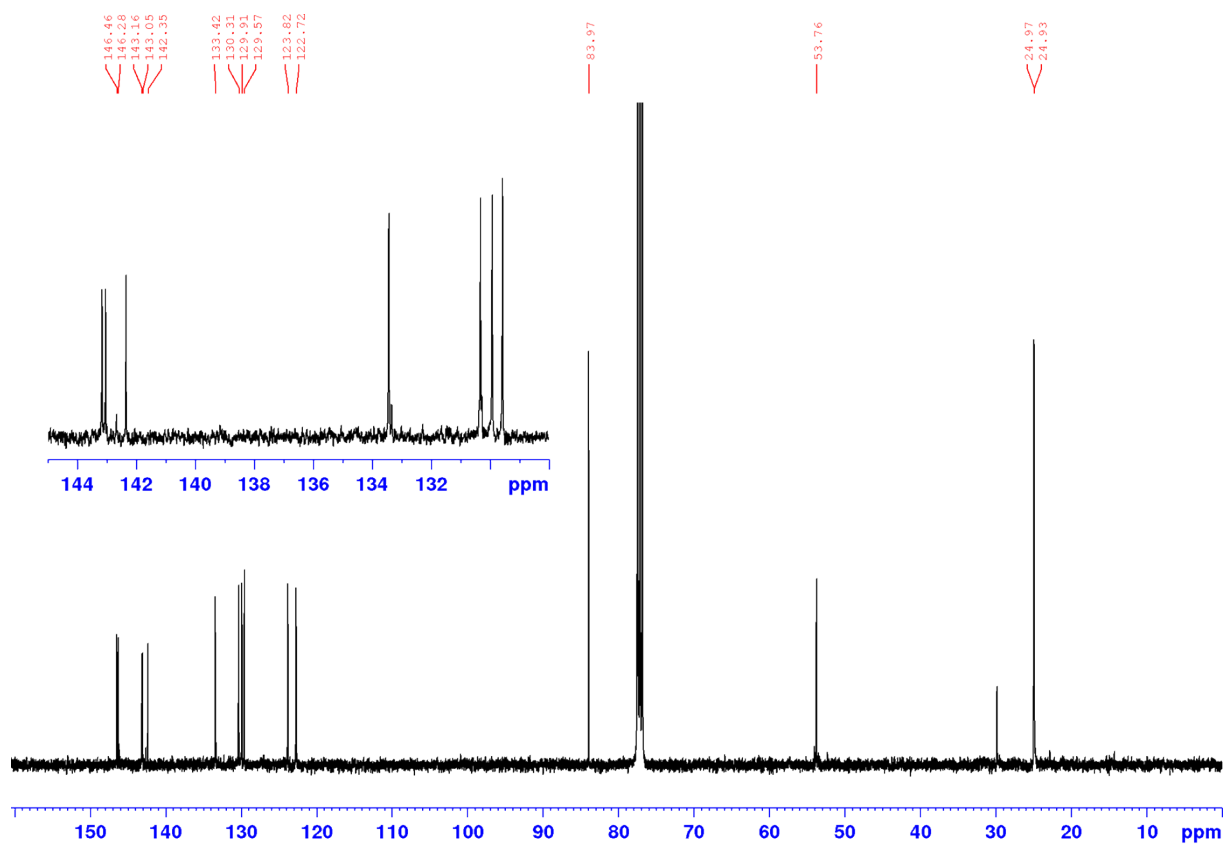

Fig S18:  $^{13}\text{C-NMR}$ : TTC(PAZ)-(Bpin) $_2$  ( $\text{CDCl}_3$ , 100.6 MHz).

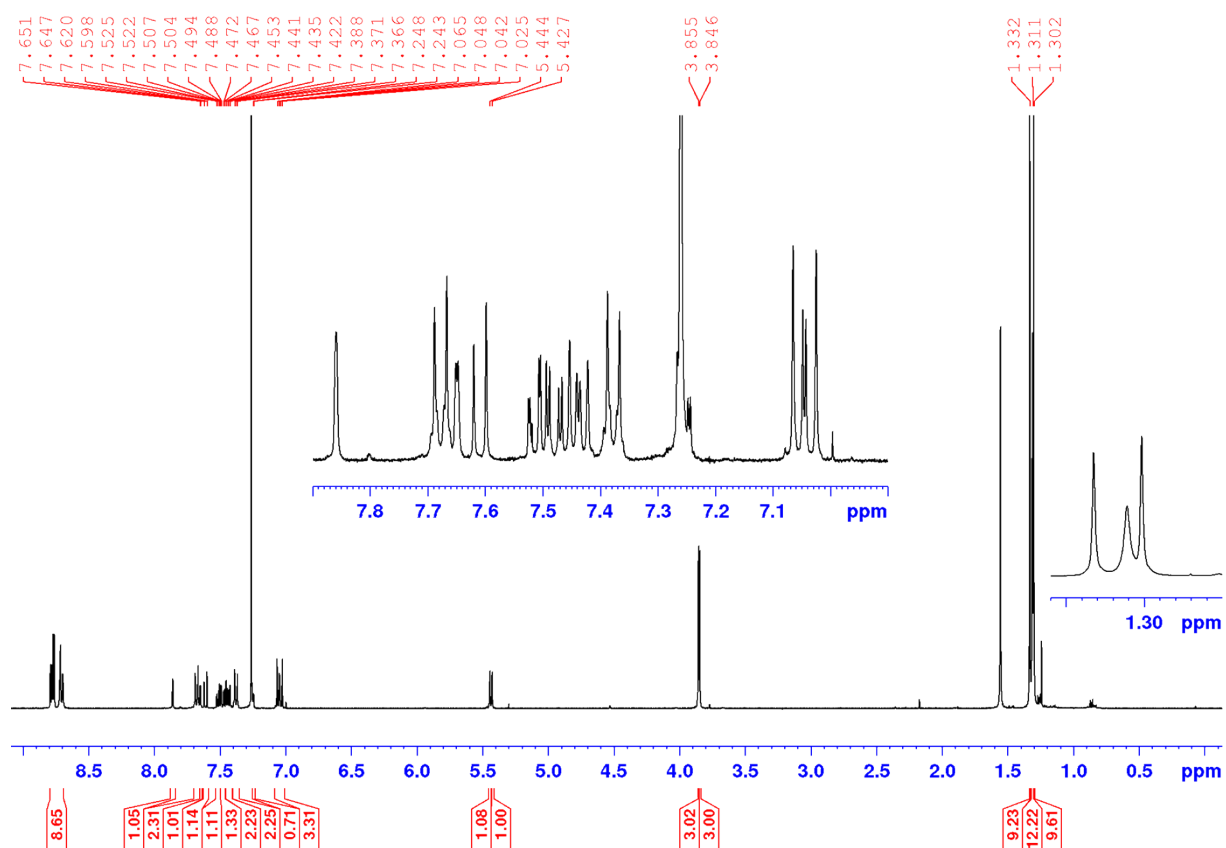

Fig S19:  $^1\text{H-NMR}$ : Bpin-TTC(OMe) $_2$ -PDI ( $\text{CDCl}_3$ , 400.1 MHz).

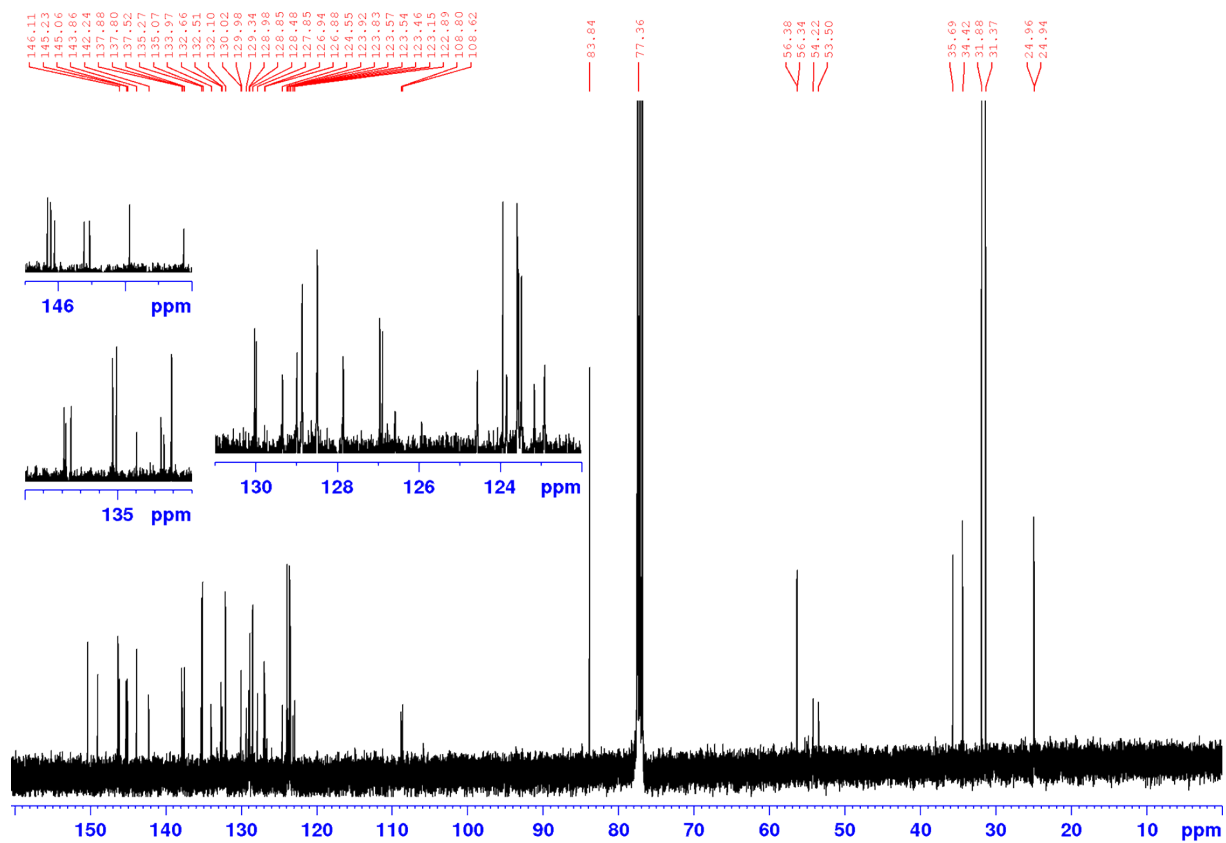

Fig S20:  $^{13}\text{C-NMR}$ : Bpin-TTC(OMe) $_2$ -PDI ( $\text{CDCl}_3$ , 100.6 MHz).

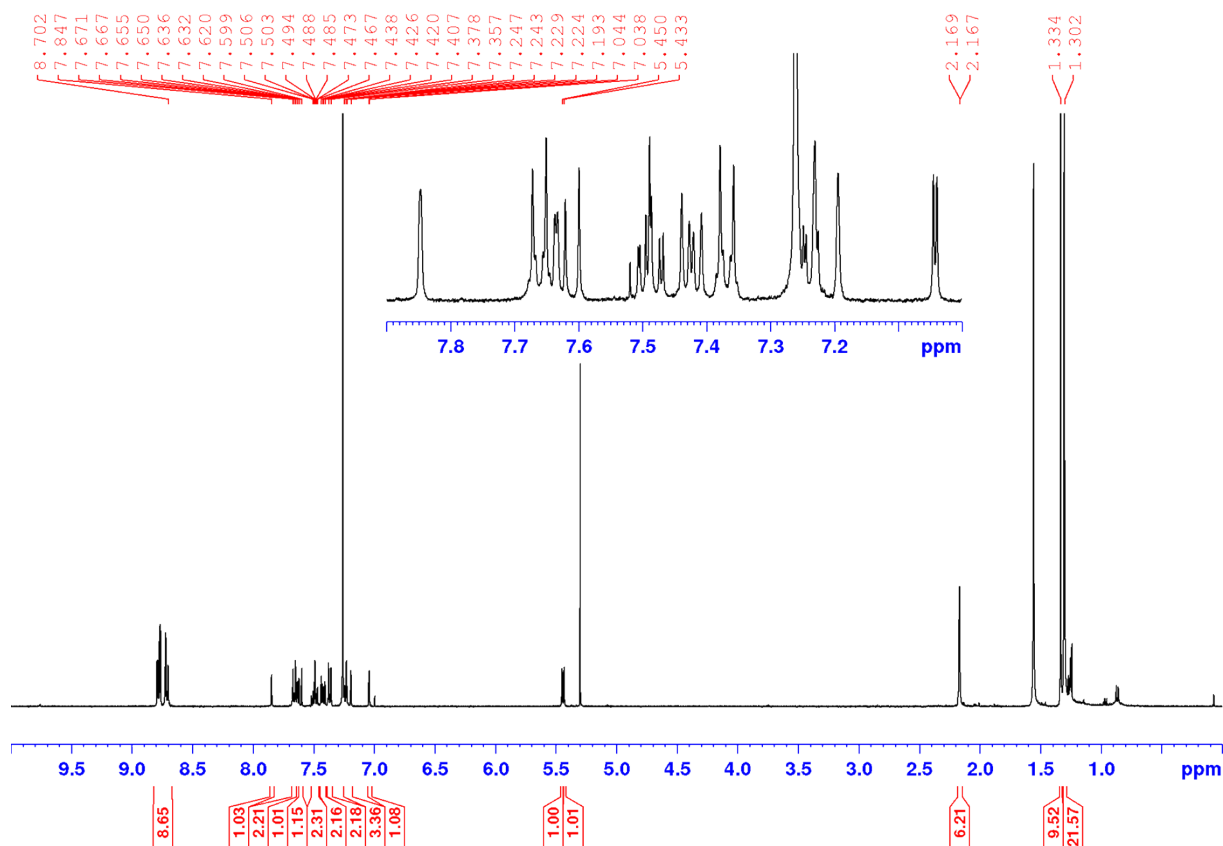

Fig S21:  $^1\text{H-NMR}$ : Bpin-TTC(Me) $_2$ -PDI ( $\text{CDCl}_3$ , 400.1 MHz).

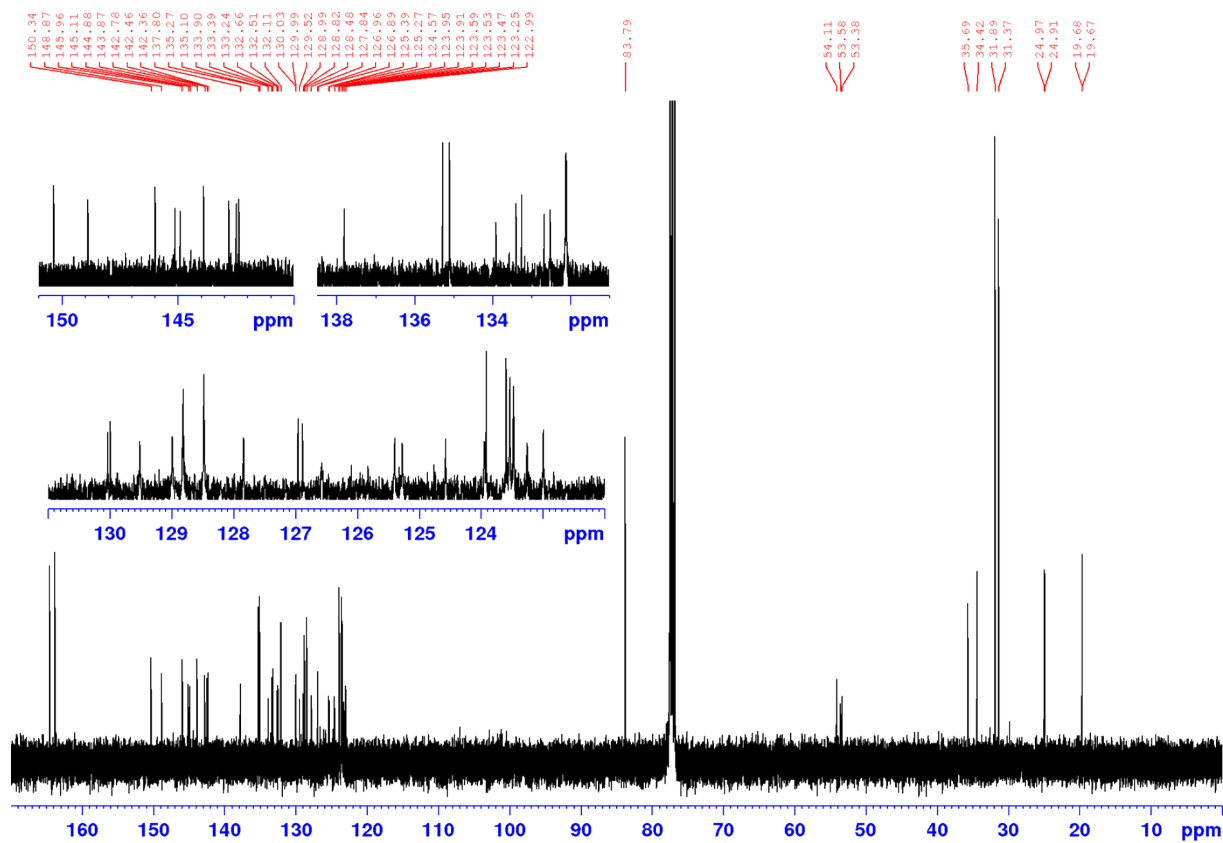

Fig S22:  $^{13}\text{C-NMR}$ : Bpin-TTC(Me) $_2$ -PDI ( $\text{CDCl}_3$ , 100.6 MHz).

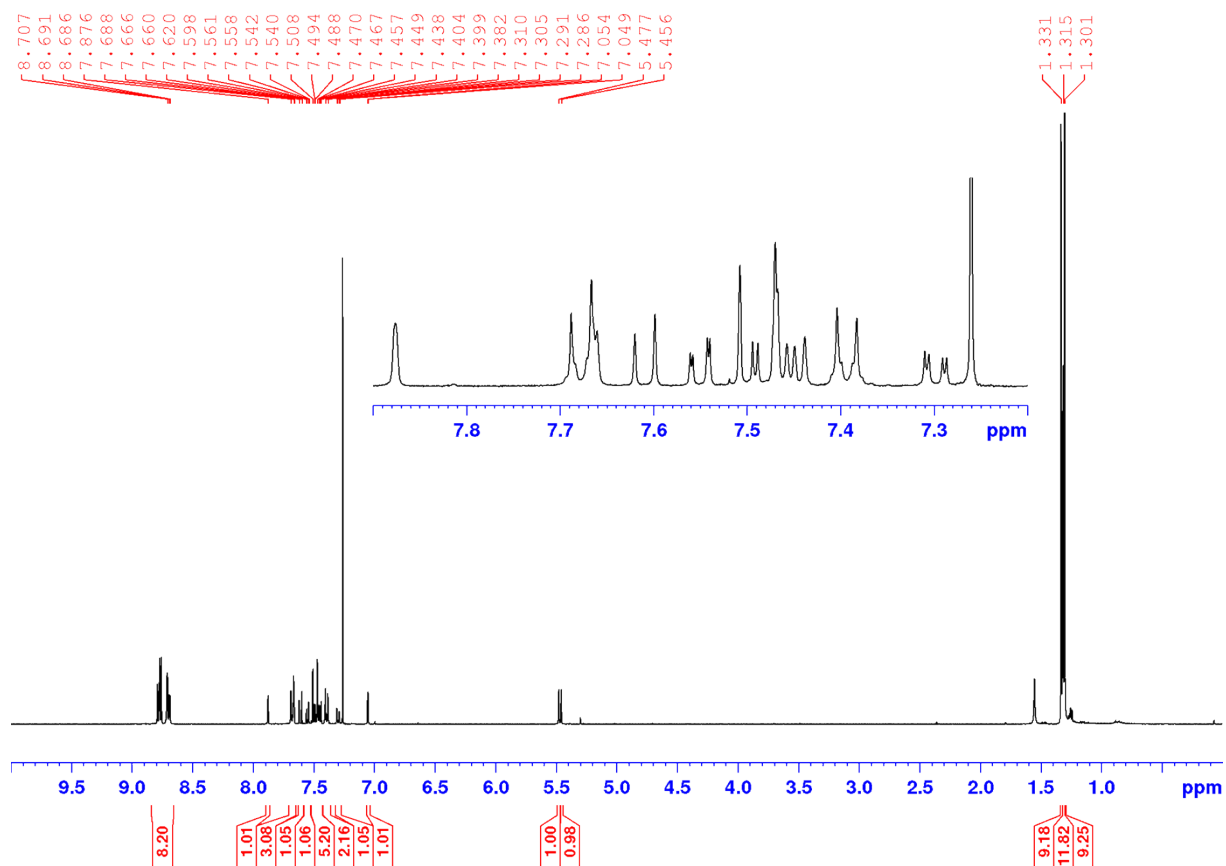

Fig S23:  $^1\text{H-NMR}$ : Bpin-TTC(Cl) $_2$ -PDI ( $\text{CDCl}_3$ , 400.1 MHz).

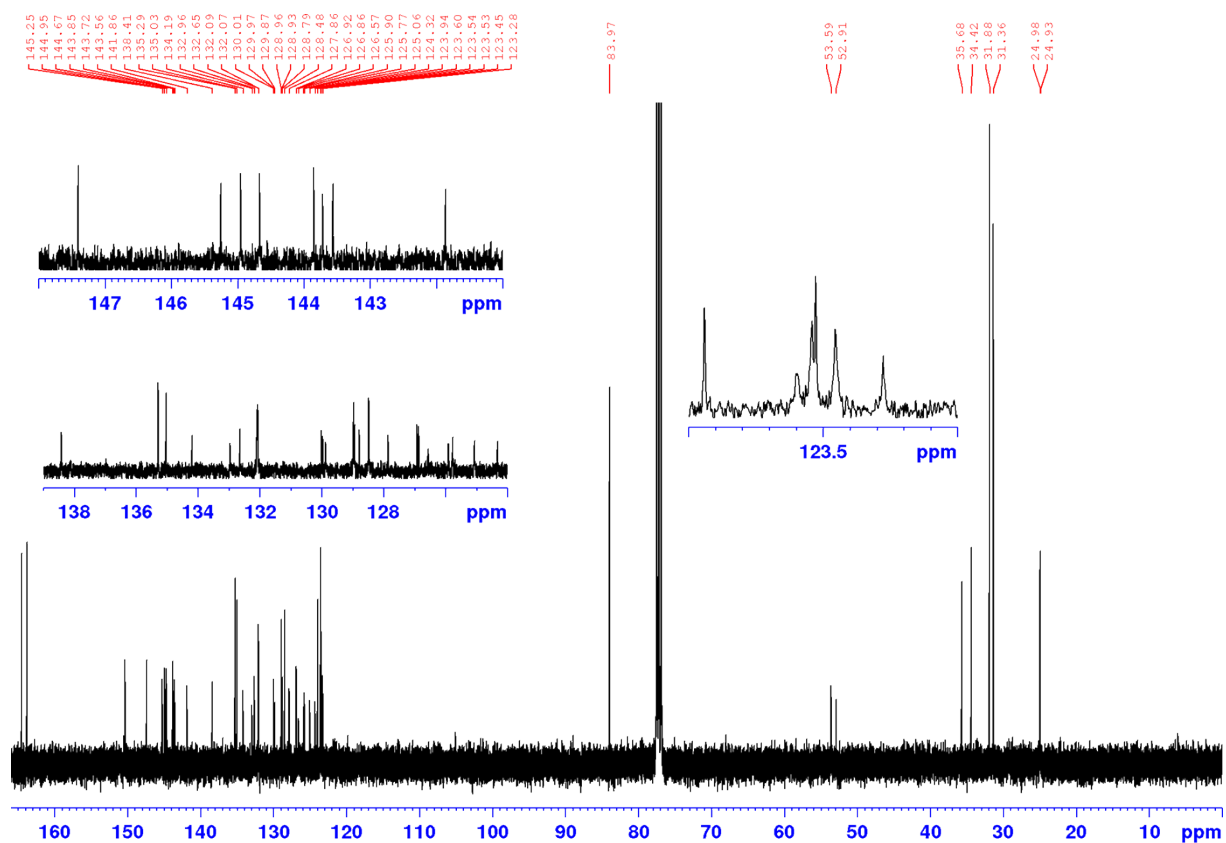

Fig S24:  $^{13}\text{C-NMR}$ : Bpin-TTC(Cl) $_2$ -PDI ( $\text{CDCl}_3$ , 100.6 MHz).

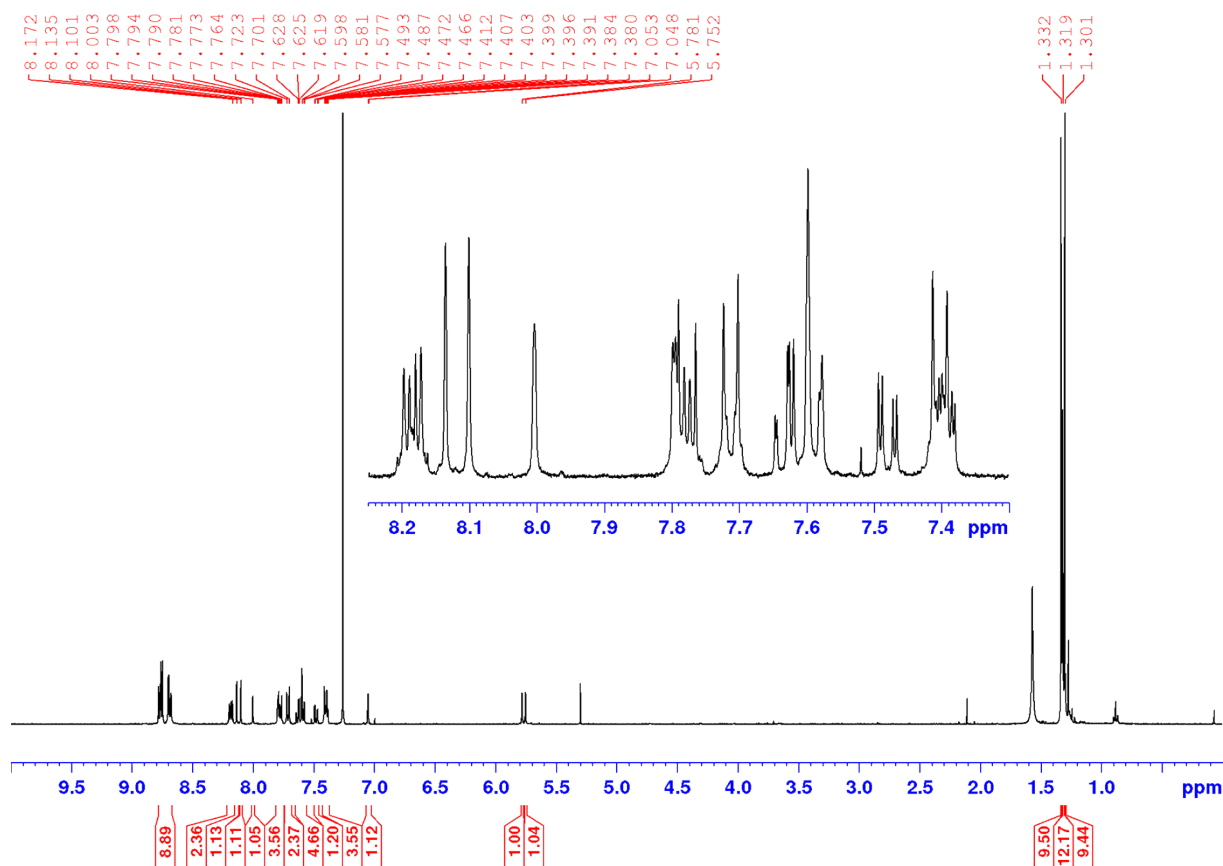

**Fig S25:**  $^1\text{H-NMR}$ : Bpin-TTC(PAZ)-PDI ( $\text{CDCl}_3$ , 400.1 MHz).

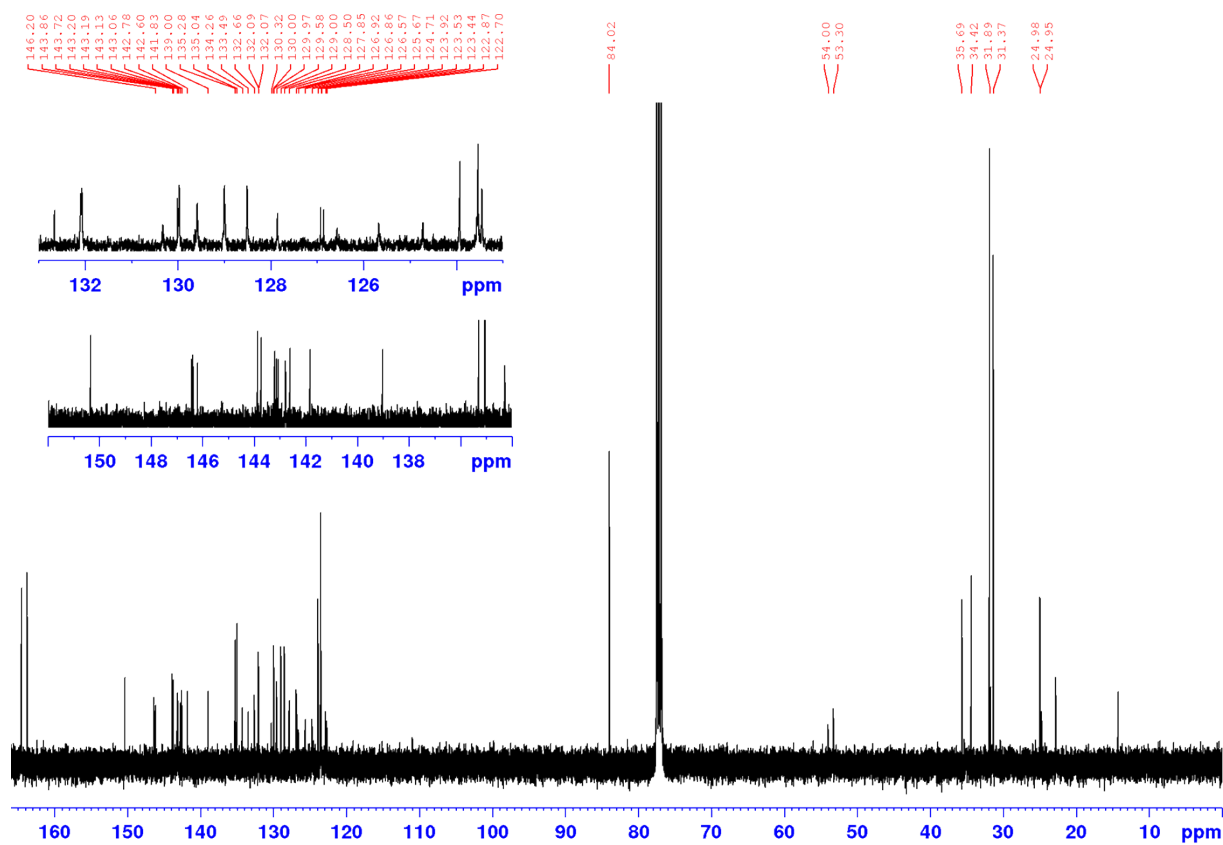

**Fig S26:**  $^{13}\text{C-NMR}$ : Bpin-TTC(PAZ)-PDI ( $\text{CDCl}_3$ , 100.6 MHz).



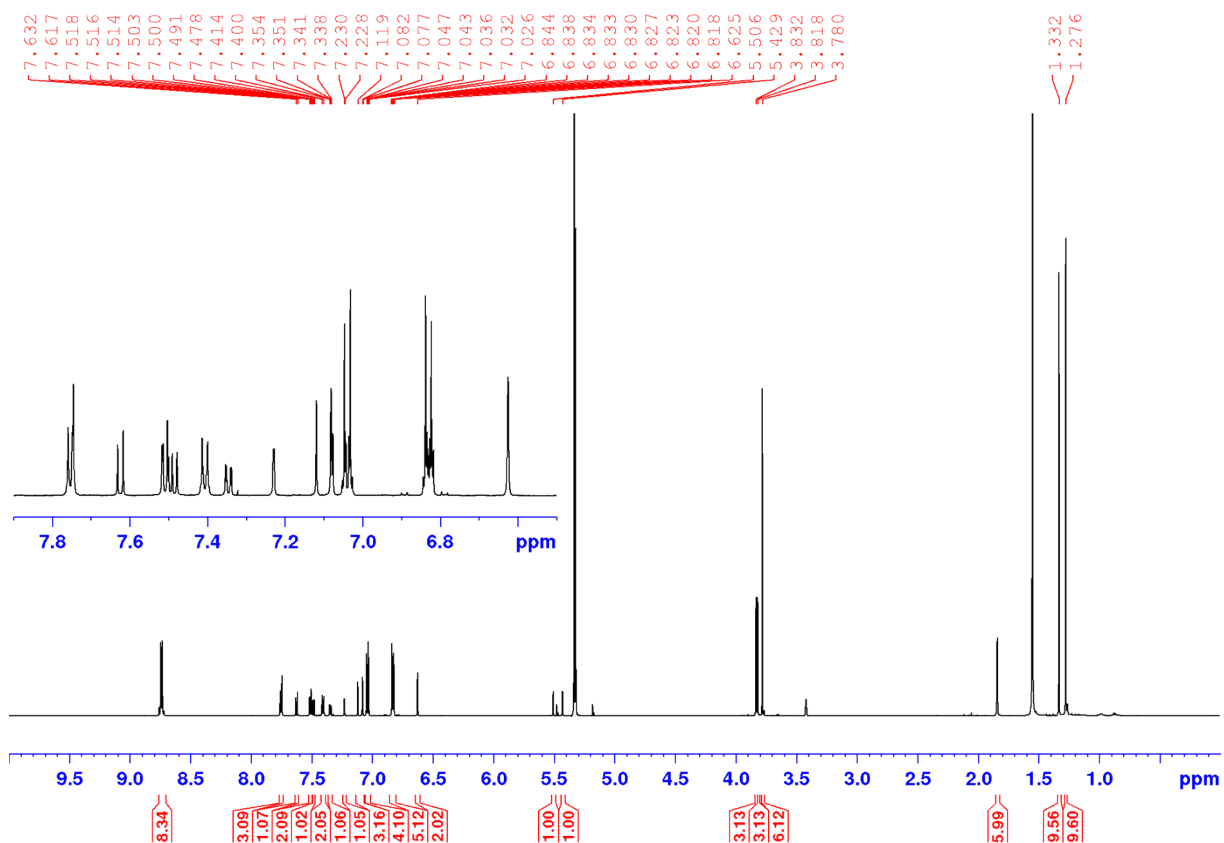

Fig S27:  $^1\text{H-NMR}$ : TAA-TTC(OMe) $_2$ -PDI ( $\text{CD}_2\text{Cl}_2$ , 600.1 MHz).

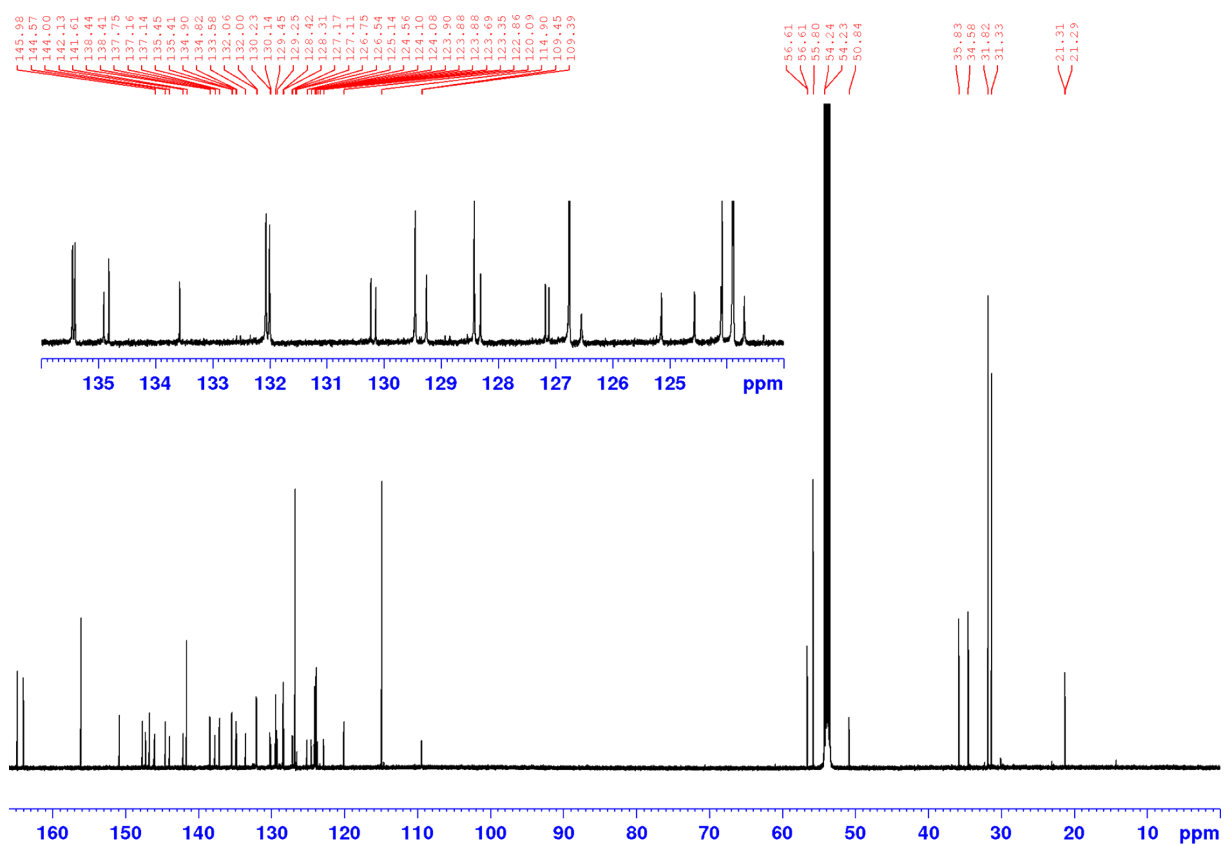

Fig S28:  $^{13}\text{C-NMR}$ : TAA-TTC(OMe) $_2$ -PDI ( $\text{CD}_2\text{Cl}_2$ , 150.9 MHz).

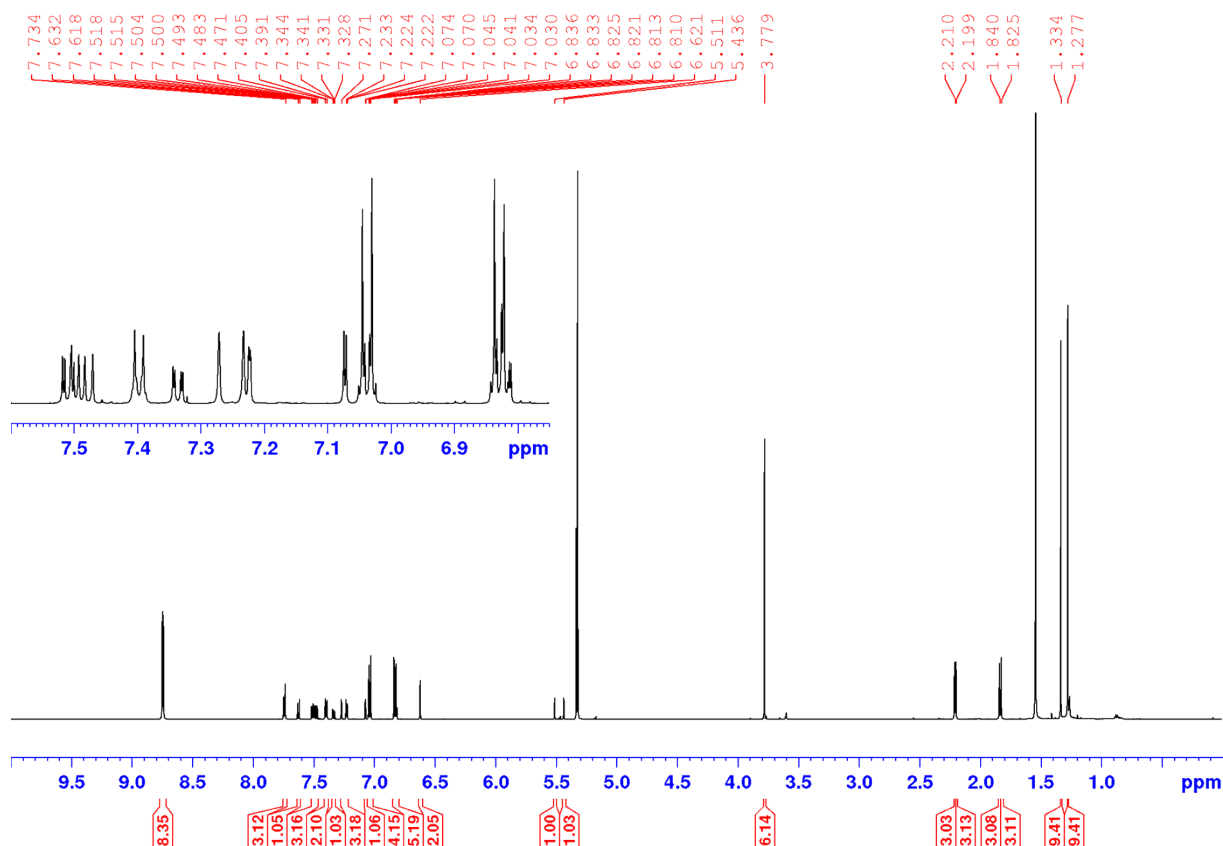

**Fig S29:**  $^1\text{H-NMR}$ : TAA-TTC(Me) $_2$ -PDI ( $\text{CD}_2\text{Cl}_2$ , 600.1 MHz).

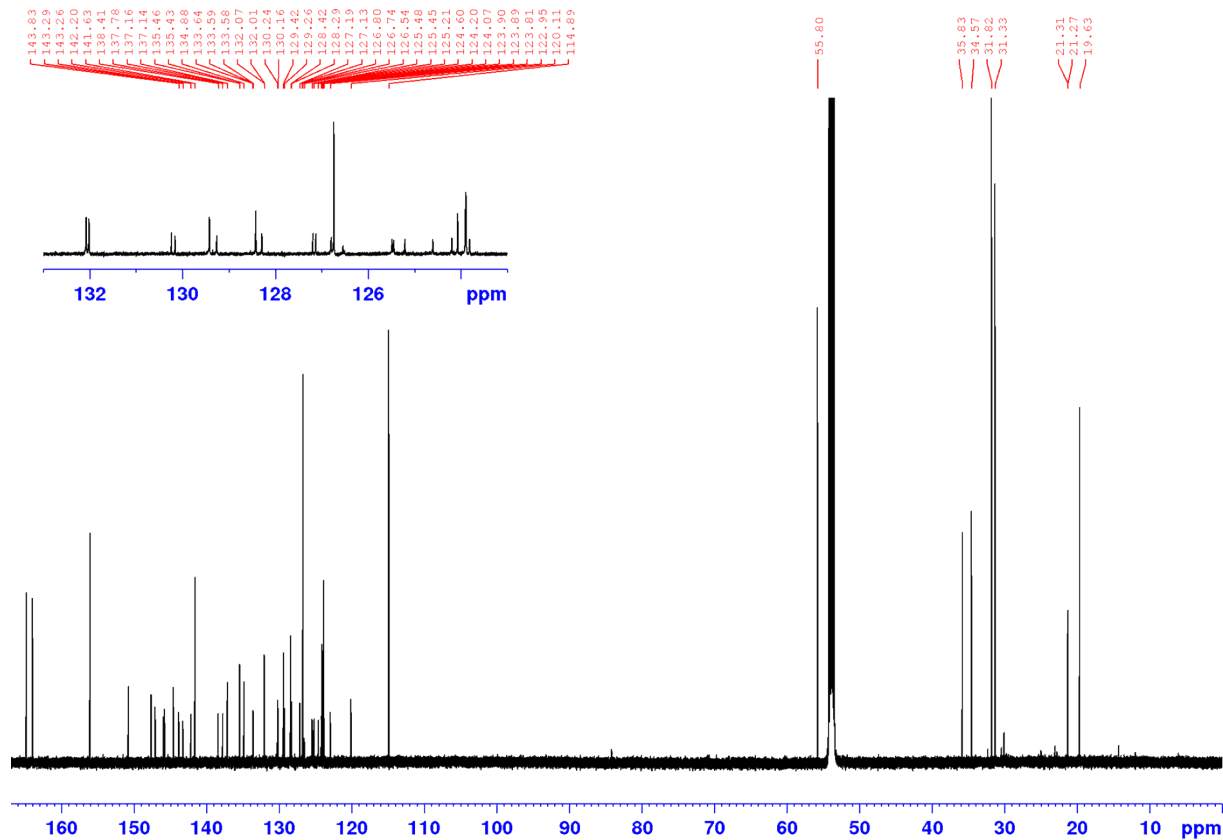

**Fig S30:**  $^{13}\text{C-NMR}$ : TAA-TTC(Me) $_2$ -PDI ( $\text{CD}_2\text{Cl}_2$ , 150.9 MHz).

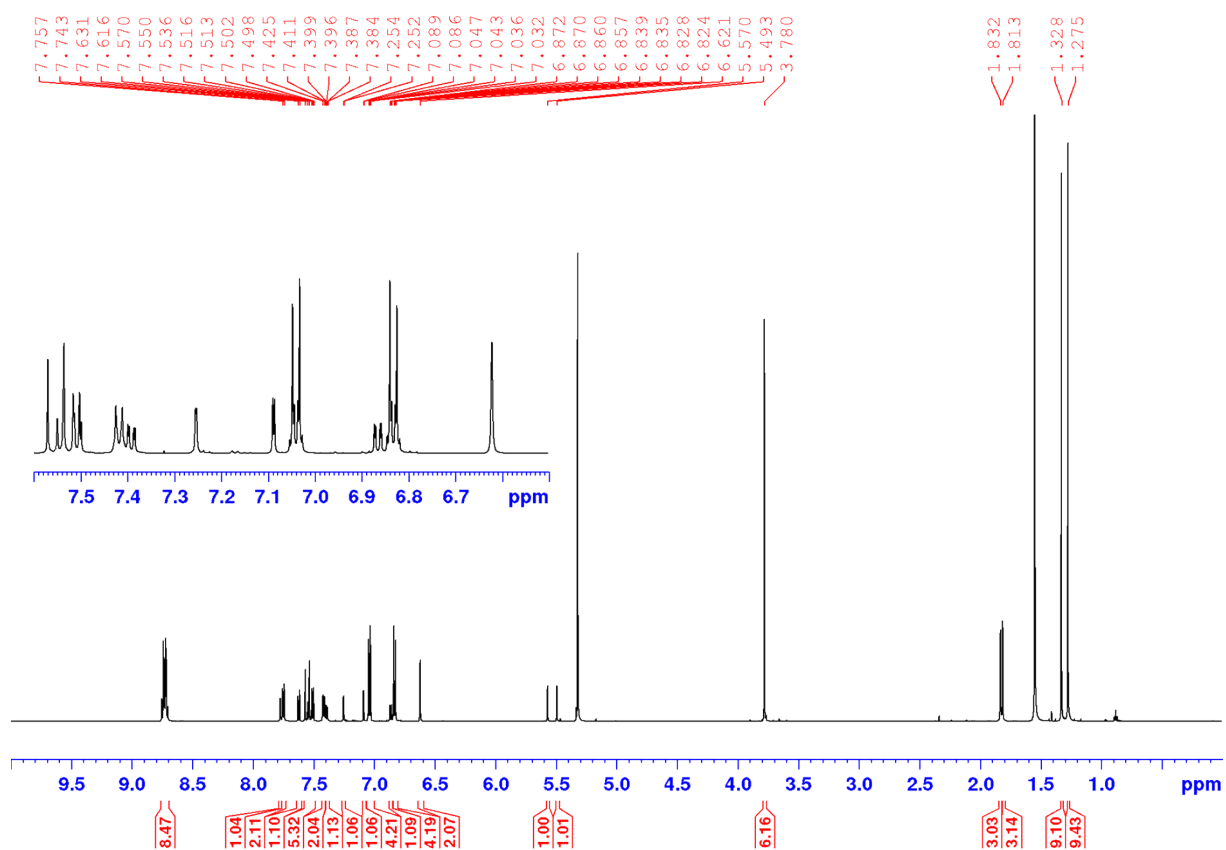

**Fig S31:**  $^1\text{H-NMR}$ : TAA-TTC(Cl) $_2$ -PDI ( $\text{CD}_2\text{Cl}_2$ , 600.1 MHz).

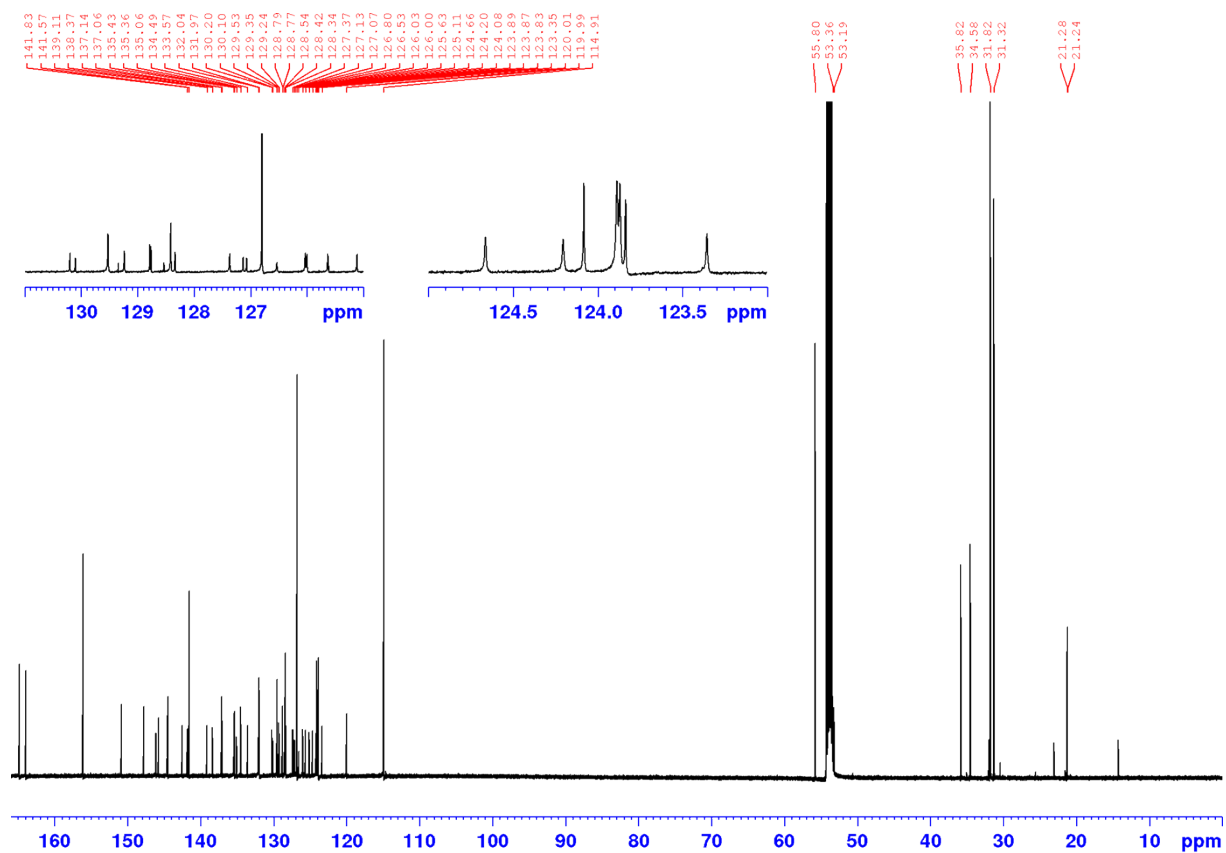

**Fig S32:**  $^{13}\text{C-NMR}$ : TAA-TTC(Cl) $_2$ -PDI ( $\text{CD}_2\text{Cl}_2$ , 150.9 MHz).

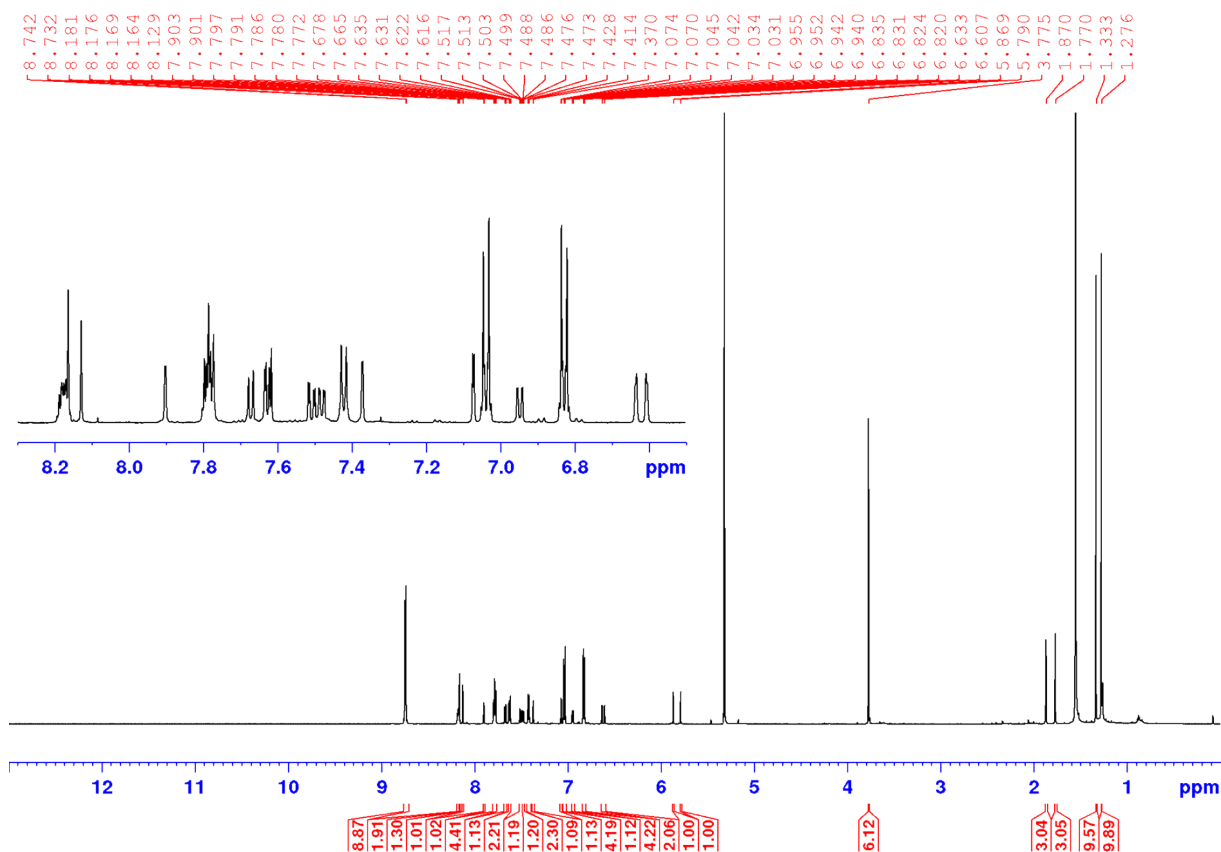

**Fig S33:**  $^1\text{H-NMR}$ : TAA-TTC(PAZ)-PDI ( $\text{CD}_2\text{Cl}_2$ , 600.1 MHz).

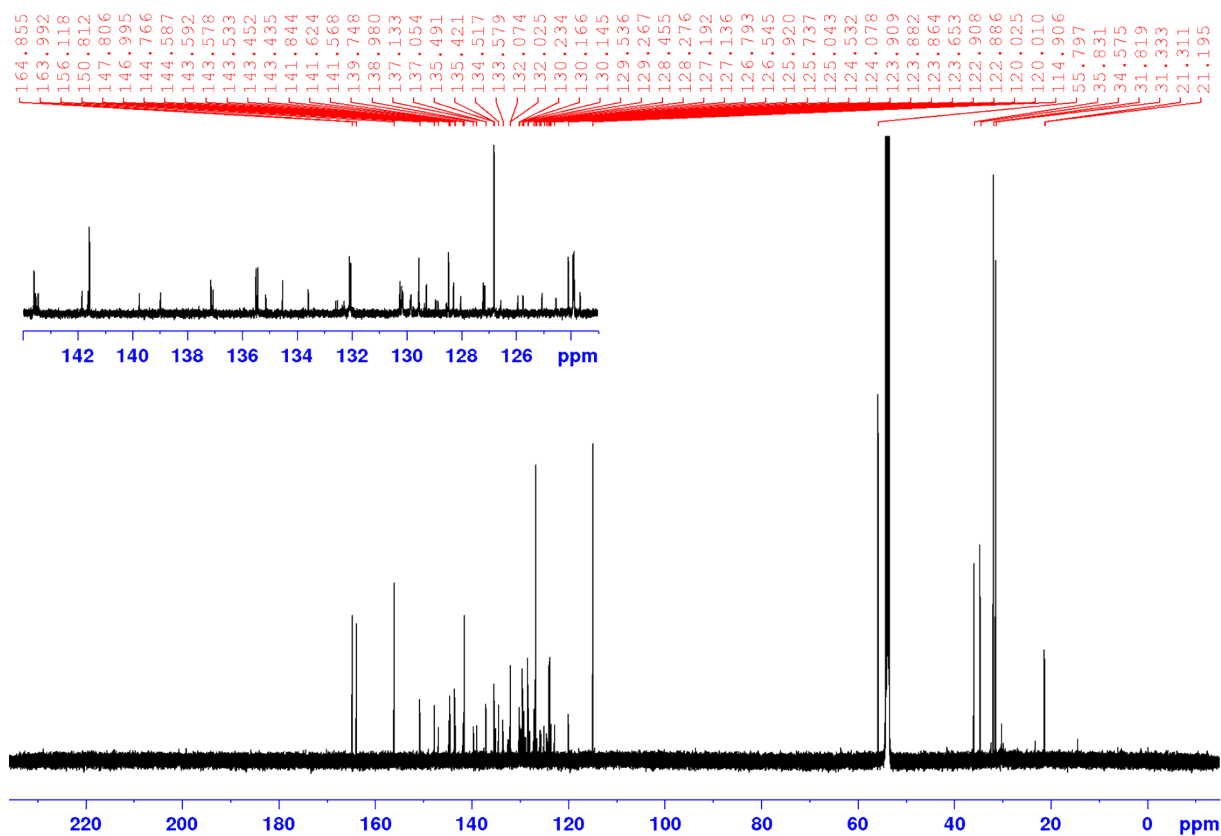

**Fig S34:**  $^{13}\text{C-NMR}$ : TAA-TTC(PAZ)-PDI ( $\text{CD}_2\text{Cl}_2$ , 150.9 MHz).

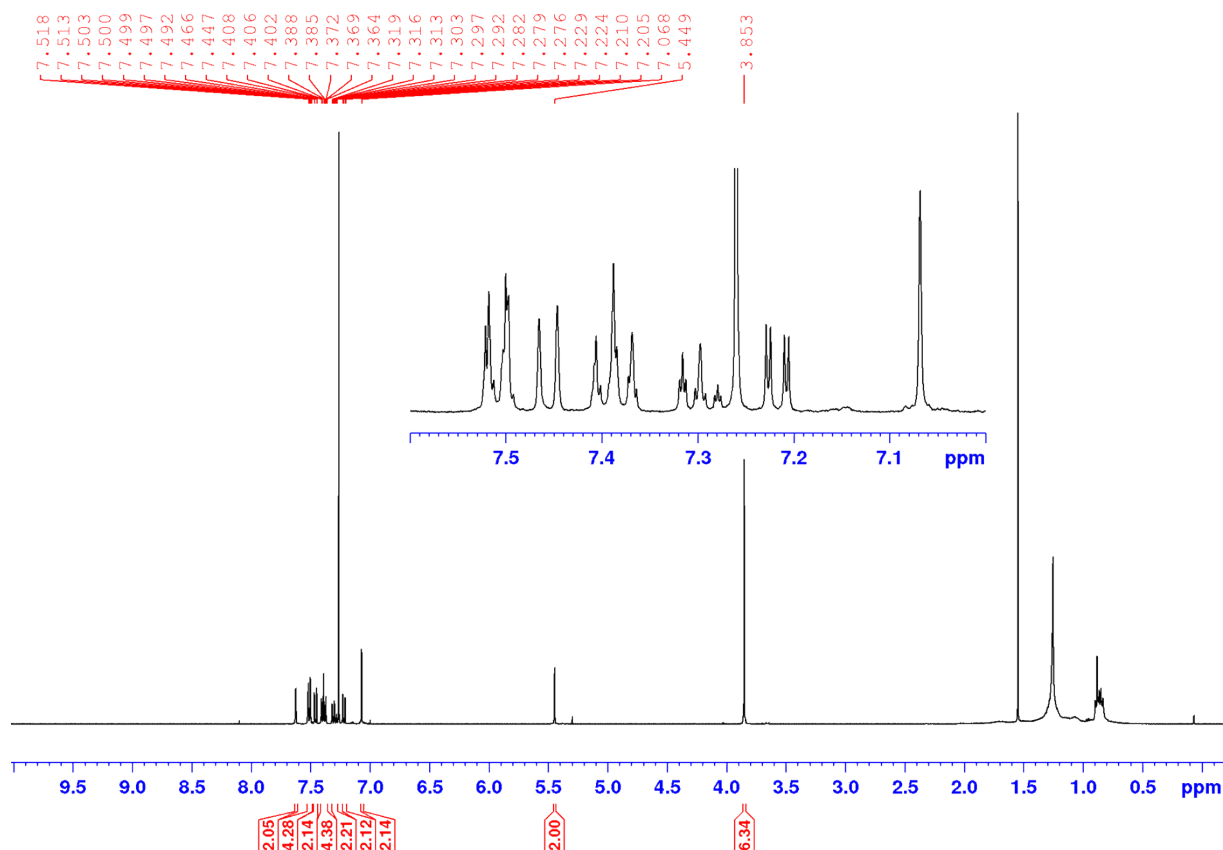

**Fig S35:**  $^1\text{H-NMR}$ :  $\text{TTC}(\text{OMe})_2\text{-Ph}_2$  ( $\text{CDCl}_3$ , 400.1 MHz). (0.5 - 1.5 ppm = hexanes).

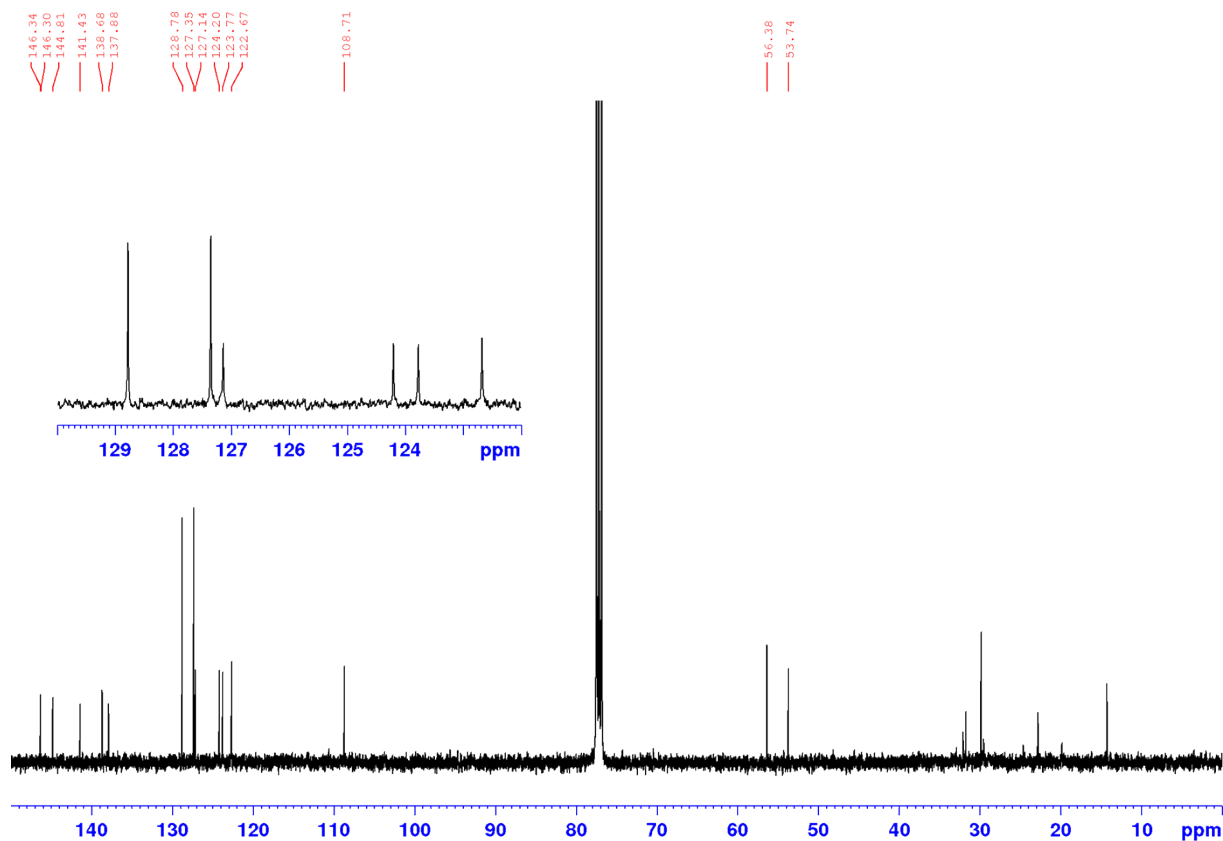

**Fig S36:**  $^{13}\text{C-NMR}$ :  $\text{TTC}(\text{OMe})_2\text{-Ph}_2$  ( $\text{CDCl}_3$ , 100.6 MHz). (below 40 ppm = hexanes).

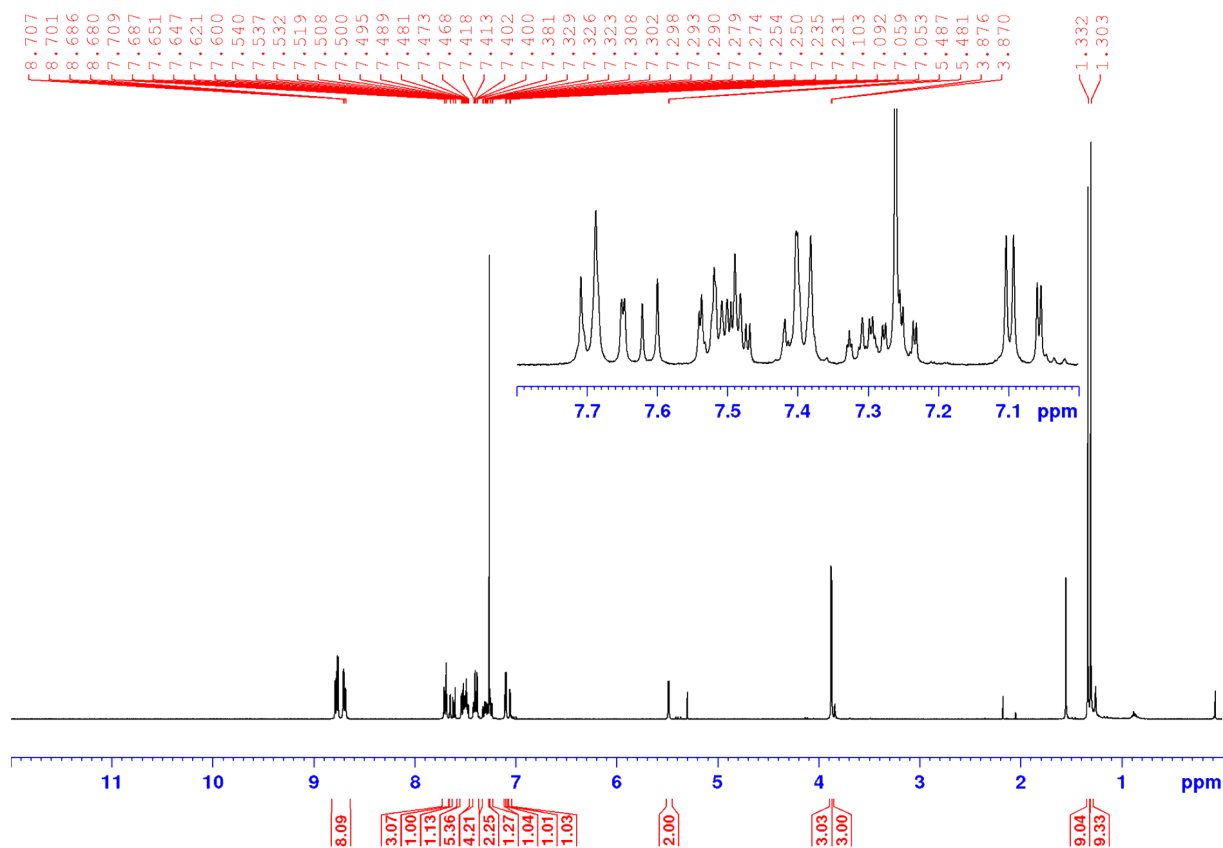

Fig S37:  $^1\text{H-NMR}$ : Ph-TTC(OMe) $_2$ -PDI ( $\text{CDCl}_3$ , 400.1 MHz).

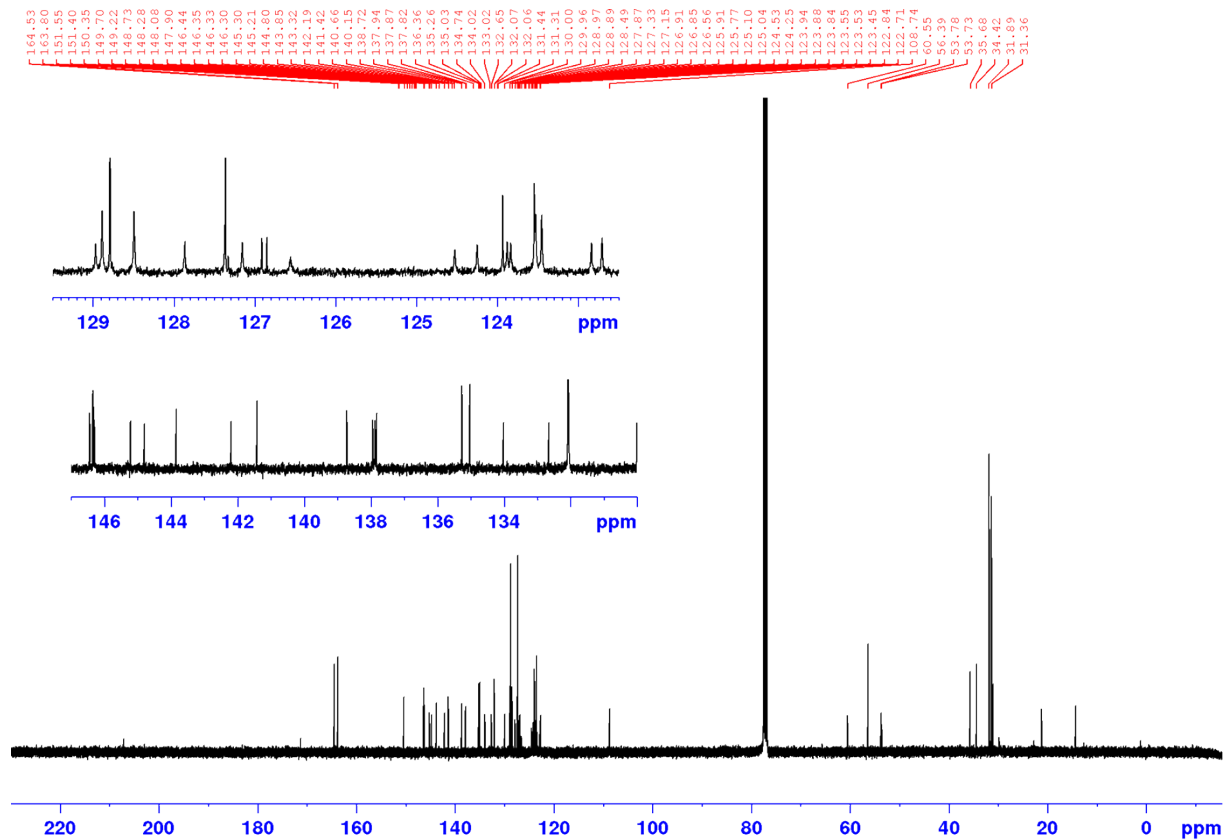

Fig S38:  $^{13}\text{C-NMR}$ : Ph-TTC(OMe) $_2$ -PDI ( $\text{CDCl}_3$ , 100.6 MHz).

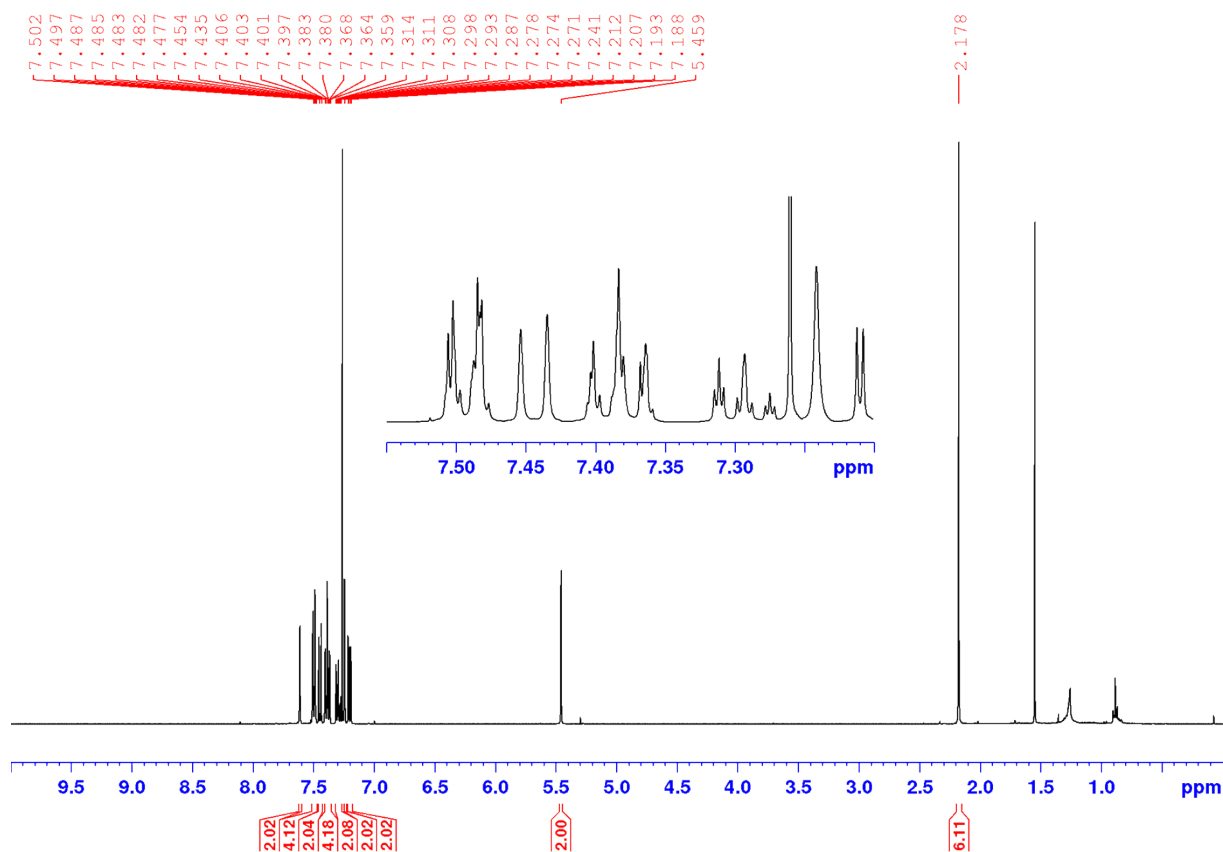

**Fig S39:**  $^1\text{H-NMR}$ :  $\text{TTC}(\text{Me})_2\text{-Ph}_2$  ( $\text{CDCl}_3$ , 400.1 MHz). (0.5 - 1.5 ppm = hexanes).

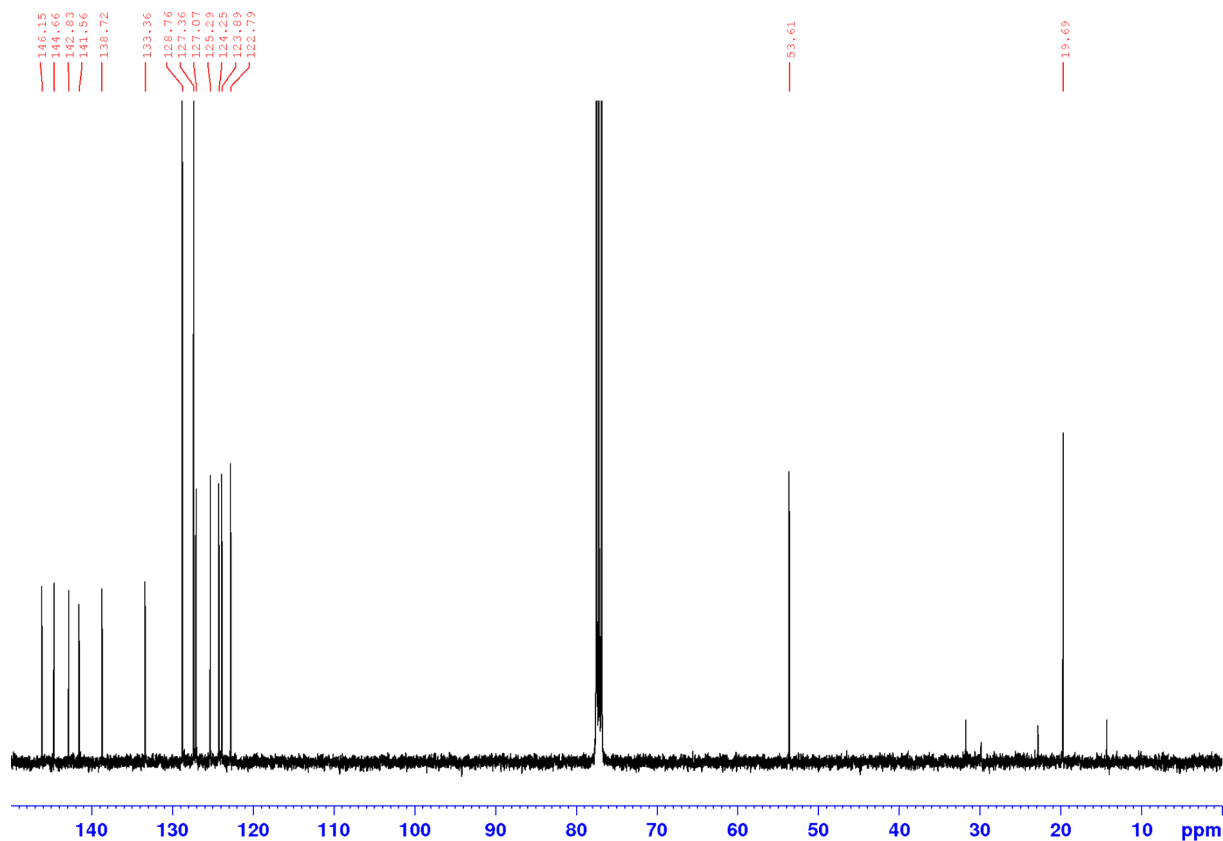

**Fig S40:**  $^{13}\text{C-NMR}$ :  $\text{TTC}(\text{Me})_2\text{-Ph}_2$  ( $\text{CDCl}_3$ , 100.6 MHz). (small peaks <40 ppm = hexanes).

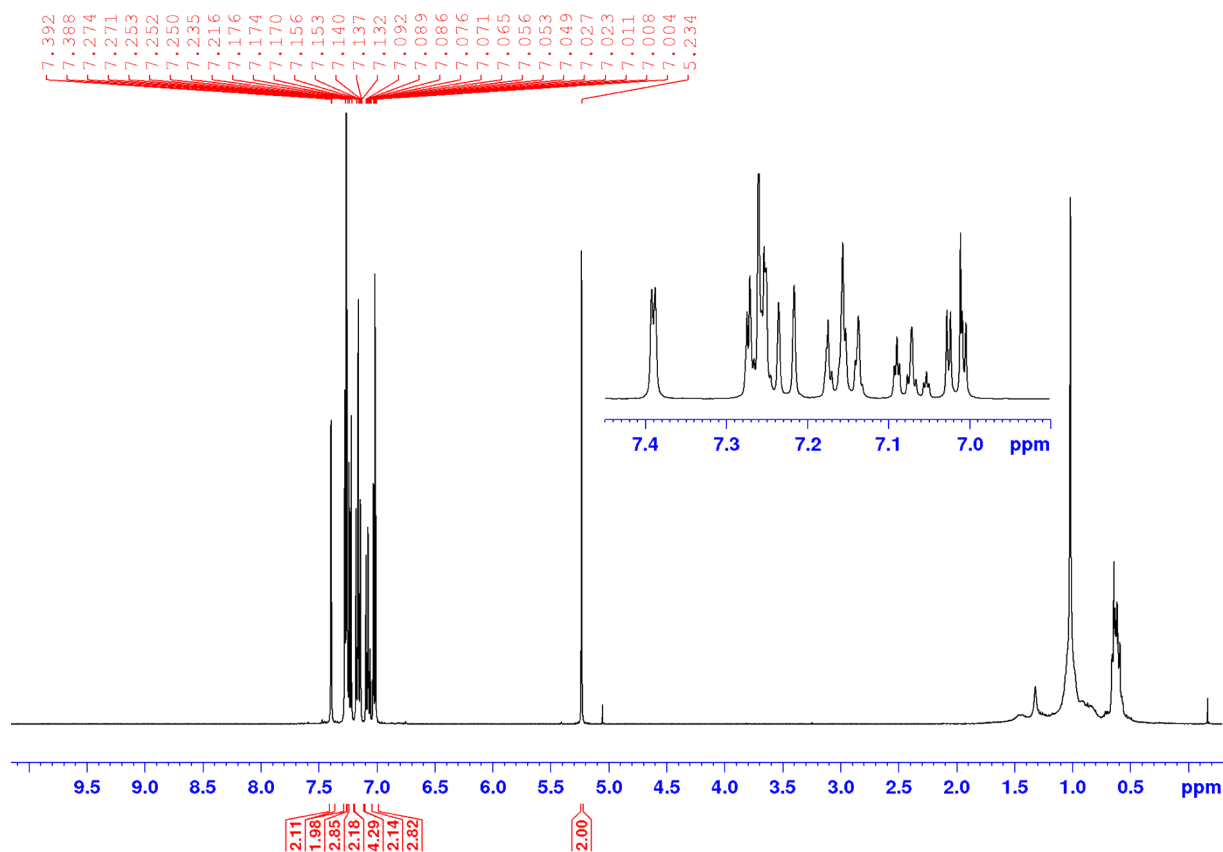

**Fig S41:**  $^1\text{H-NMR}$ :  $\text{TTC}(\text{Cl})_2\text{-Ph}_2$  ( $\text{CDCl}_3$ , 400.1 MHz). (0.5 - 1.5 ppm = hexanes).

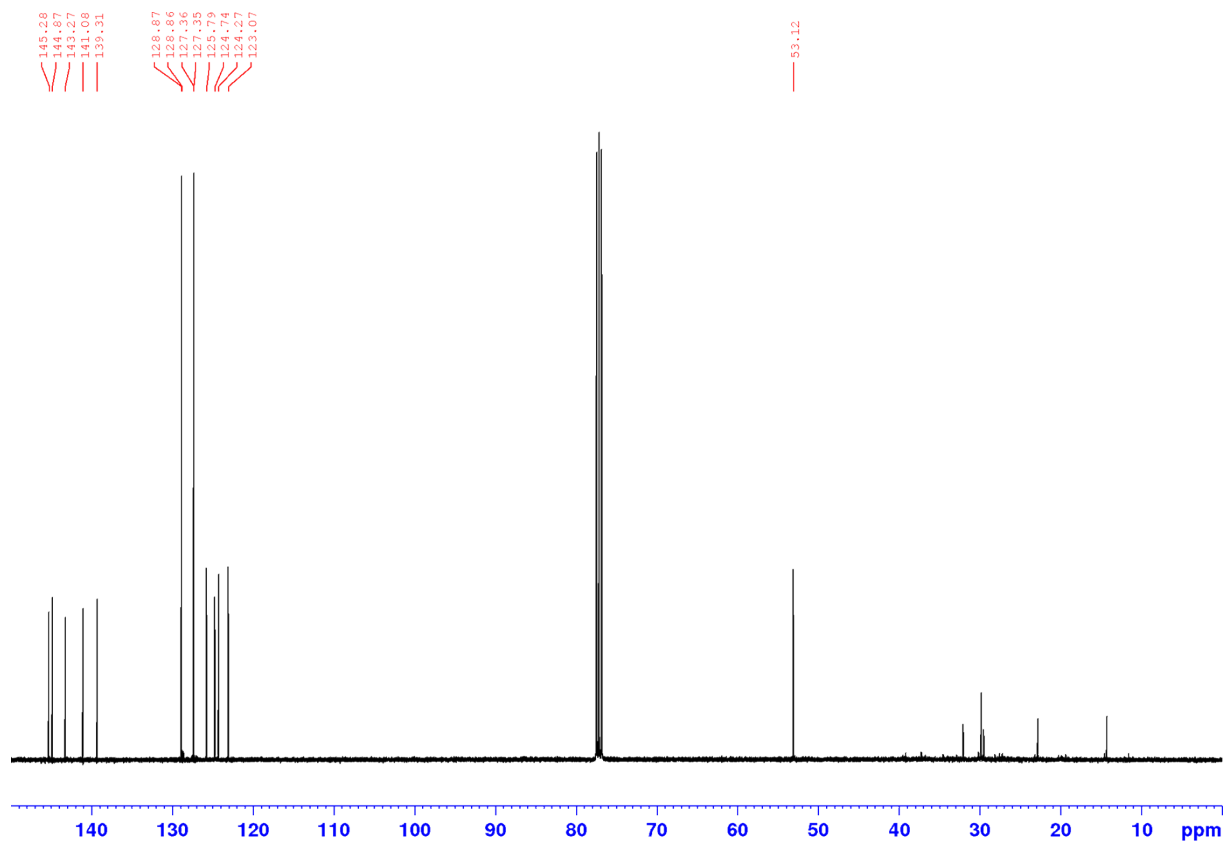

**Fig S42:**  $^{13}\text{C-NMR}$ :  $\text{TTC}(\text{Cl})_2\text{-Ph}_2$  ( $\text{CDCl}_3$ , 100.6 MHz). (small peaks <40 ppm = hexanes).



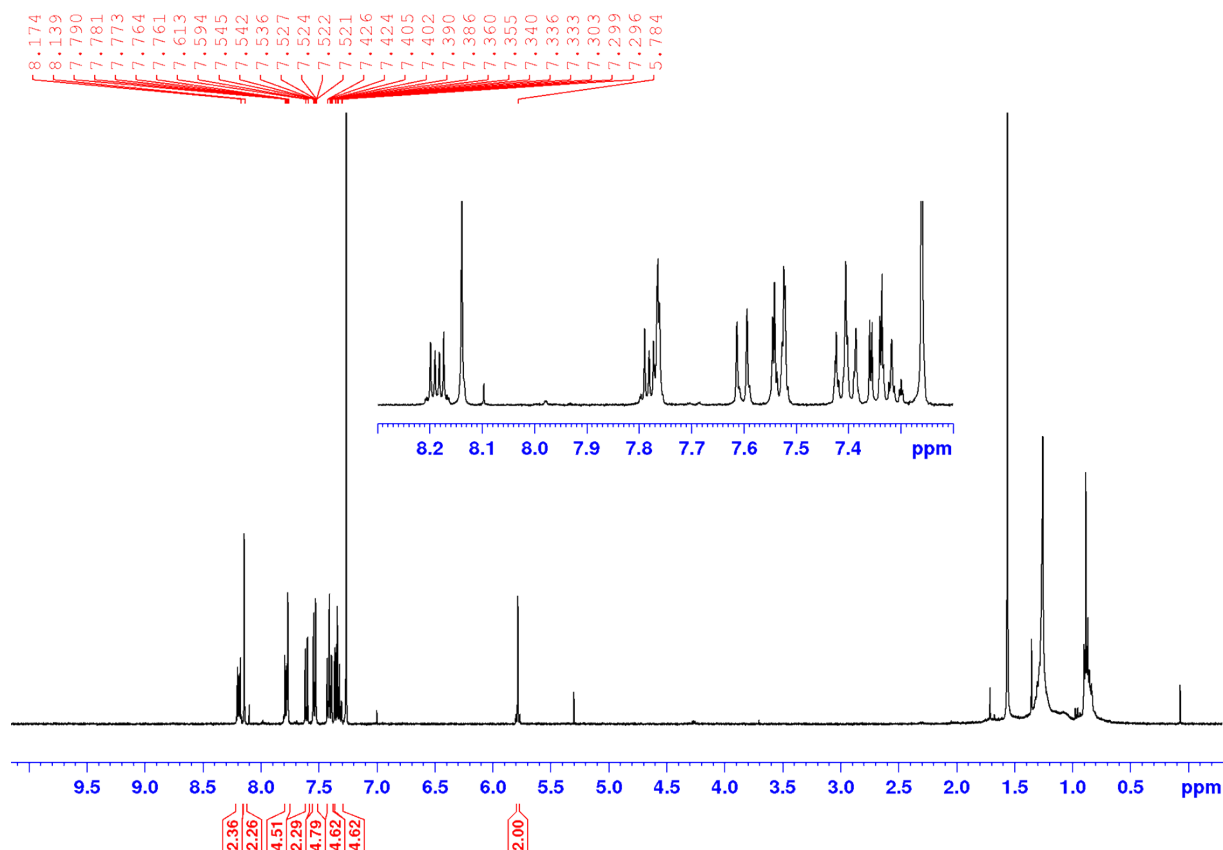

**Fig S43:**  $^1\text{H-NMR}$ : TTC(PAZ)- $\text{Ph}_2$  ( $\text{CDCl}_3$ , 400.1 MHz). (0.5 - 1.5 ppm = hexanes).

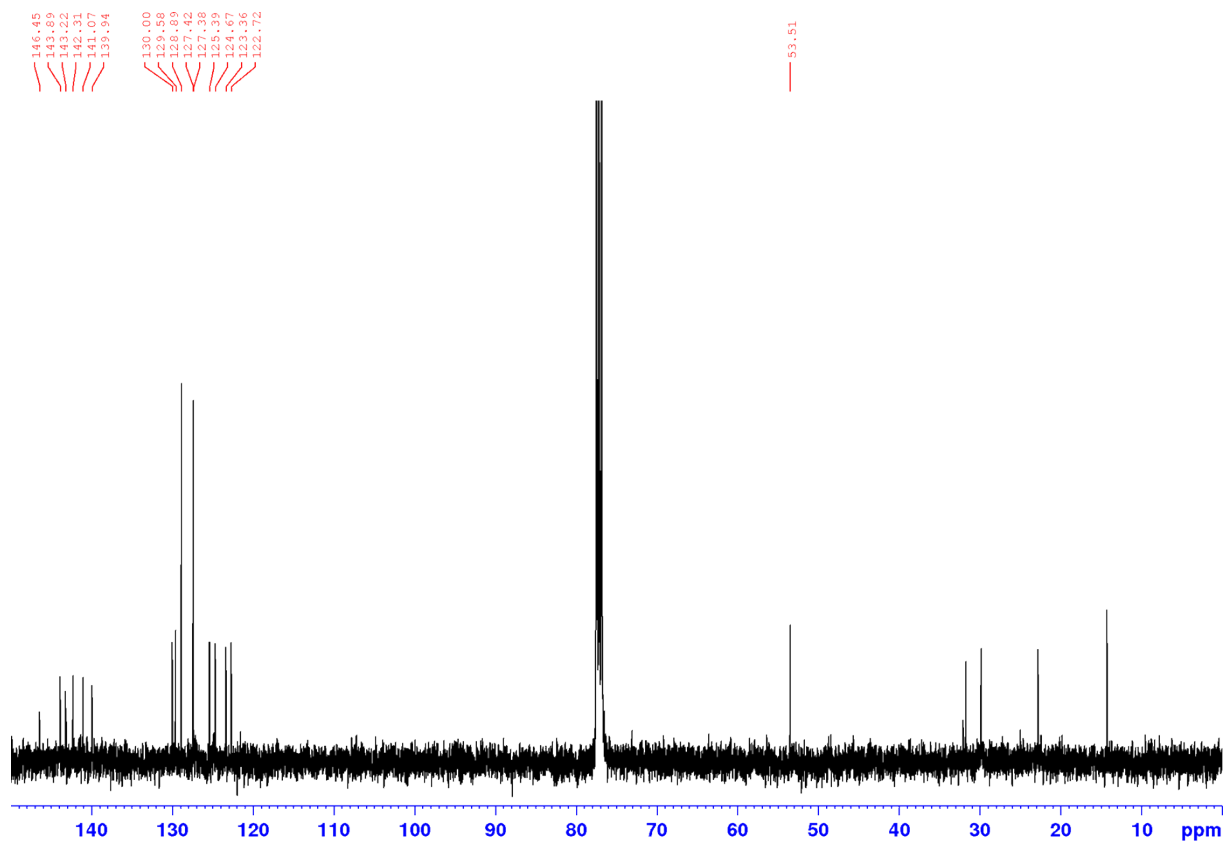

**Fig S44:**  $^{13}\text{C-NMR}$ : TTC(PAZ)- $\text{Ph}_2$  ( $\text{CDCl}_3$ , 100.6 MHz). (peaks <40 ppm = hexanes).

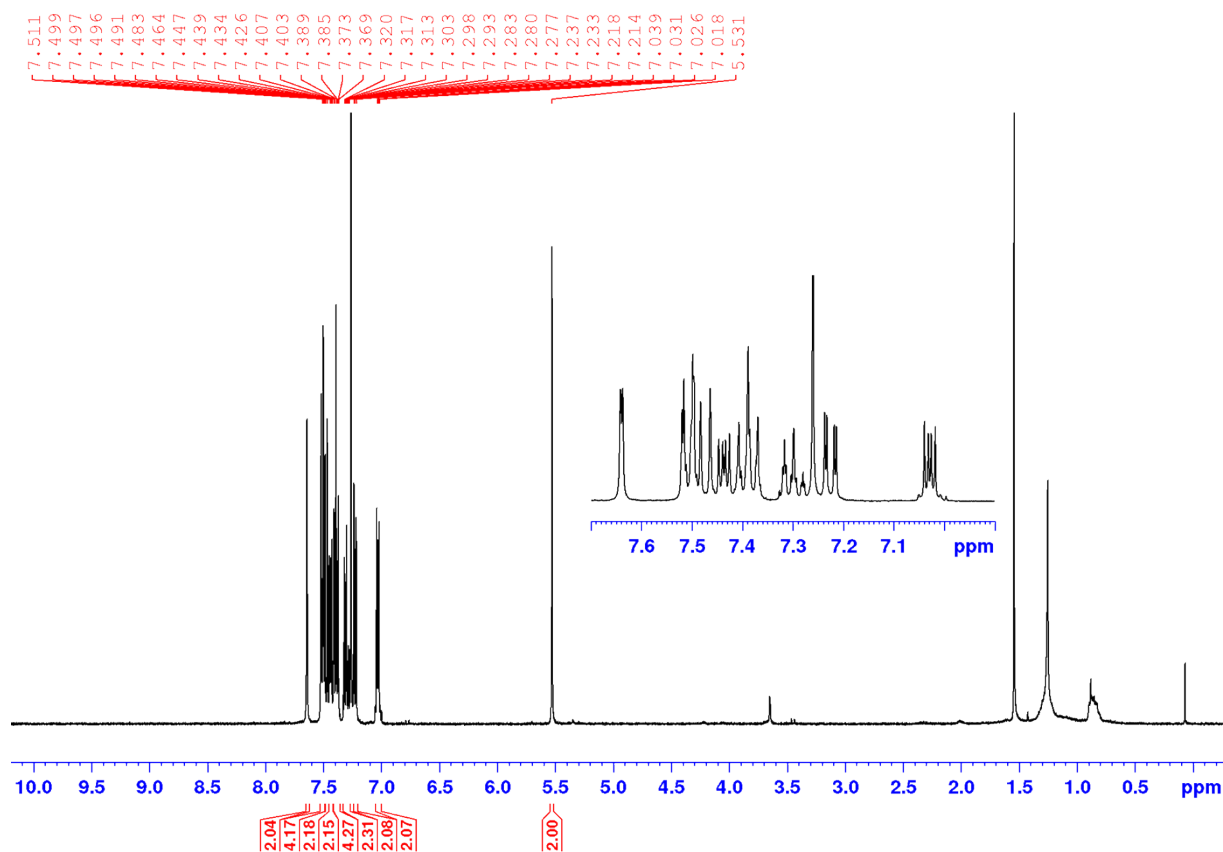

**Fig S45:**  $^1\text{H-NMR}$ :  $\text{TTC}(\text{H})_2\text{-Ph}_2$  ( $\text{CDCl}_3$ , 400.1 MHz). (0.5 - 1.5 ppm = hexanes).

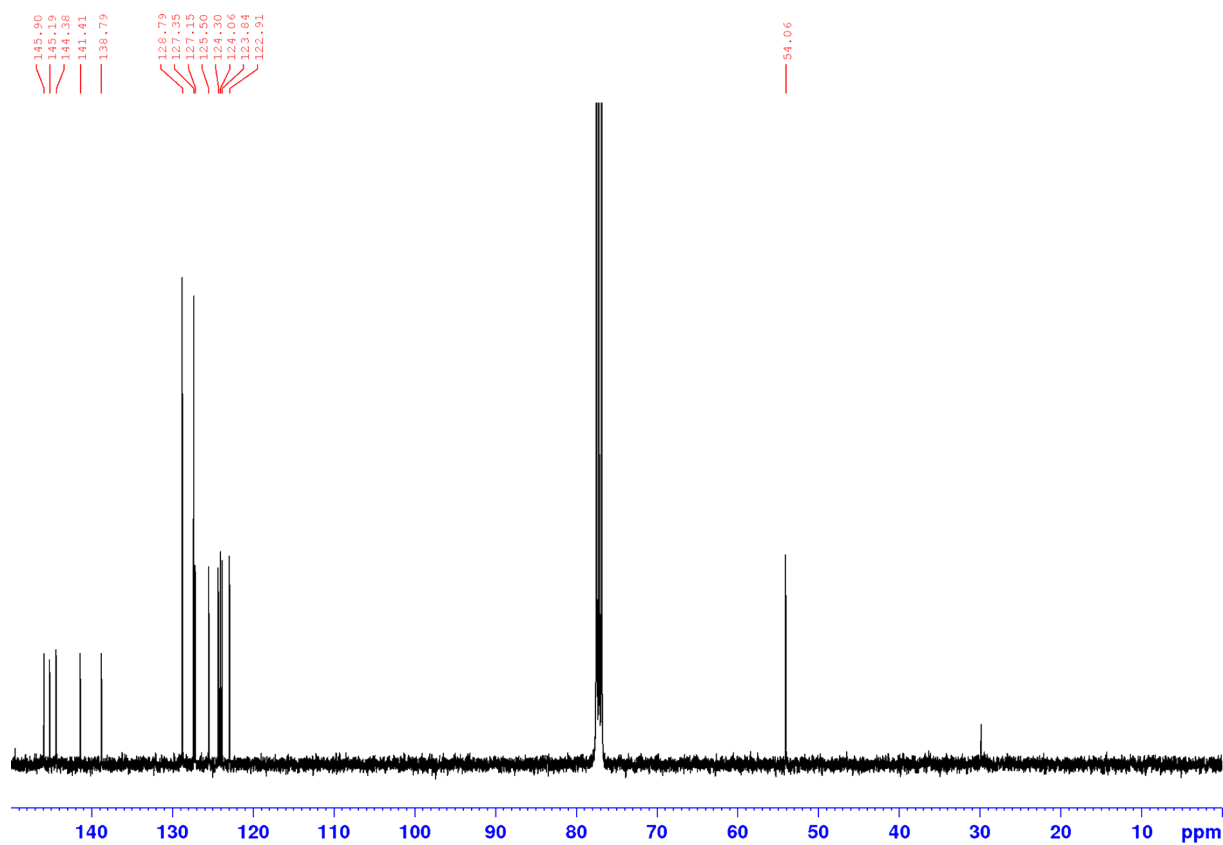

**Fig S46:**  $^{13}\text{C-NMR}$ :  $\text{TTC}(\text{H})_2\text{-Ph}_2$  ( $\text{CDCl}_3$ , 100.6 MHz). (peaks <40 ppm = hexanes).

## 2. Cyclic voltammetry

All cyclic voltammograms were measured in DCM with 0.2 M TBAHFP as a supporting electrolyte under argon atmosphere at 298 K. The electrochemical measurements used a Gamry Instruments Reference 600 Potentiostat/Galvanostat/ZRA (v. 6.2.2) with a conventional three electrode setup (platinum disc working electrode  $\varnothing = 1$  mm, Ag/AgCl 'LEAK FREE' reference electrode, platinum wire as counter electrode). All measurements were referenced against the ferrocene/ferrocenium (Fc/Fc<sup>+</sup>) redox couple and were measured with a scan rate of 100 mV s<sup>-1</sup>. The chemical reversibility of each redox-process was tested using multicycle thin layer experiments.

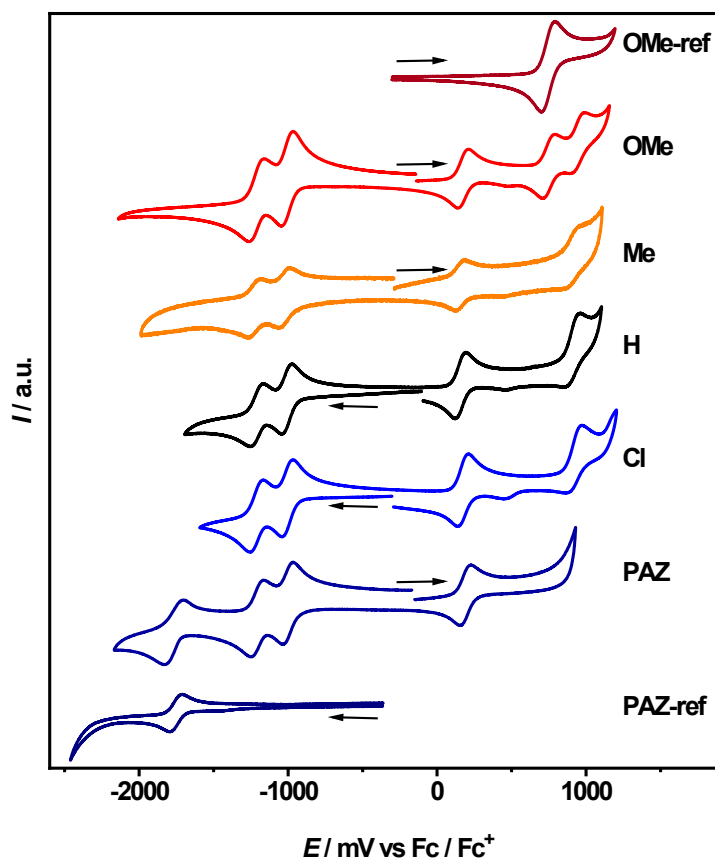

**Fig S47:** Cyclic voltammograms of all four triads in DCM containing 0.2 M TBAHF and referenced against Fc/Fc<sup>+</sup>.

**Table S1:** Redox potentials of the triads measured with 0.2 M TBAHFP in DCM at 298 K. All voltammograms are measured with a scan rate of 100 mV s<sup>-1</sup> and referenced against Fc/Fc<sup>+</sup>.

|                                     | $E_{1/2} / \text{mV}$ |                       |                       |                        |                        |                        |
|-------------------------------------|-----------------------|-----------------------|-----------------------|------------------------|------------------------|------------------------|
|                                     | <b>ox<sub>1</sub></b> | <b>ox<sub>2</sub></b> | <b>ox<sub>3</sub></b> | <b>red<sub>1</sub></b> | <b>red<sub>2</sub></b> | <b>red<sub>3</sub></b> |
| <b>TAA-TTC(OMe)<sub>2</sub>-PDI</b> | 178 <sup>b</sup>      | 749 <sup>c</sup>      | 955 <sup>a,b</sup>    | -1001 <sup>d</sup>     | -1218 <sup>d</sup>     |                        |
| <b>TAA-TTC(Me<sub>2</sub>)-PDI</b>  | 156                   | 909 <sup>a,b</sup>    | -                     | -1020 <sup>d</sup>     | -1222 <sup>d</sup>     | -                      |
| <b>TAA-TTC(H)<sub>2</sub>-PDI</b>   | 164 <sup>b</sup>      | 909 <sup>a,b</sup>    | -                     | -1015 <sup>d</sup>     | -1224 <sup>d</sup>     | -                      |
| <b>TAA-TTC(Cl)<sub>2</sub>-PDI</b>  | 179 <sup>b</sup>      | 924 <sup>a,b</sup>    | -                     | -999 <sup>d</sup>      | -1207                  | -                      |
| <b>TAA-TTC(PAZ)-PDI</b>             | 160 <sup>b</sup>      | -                     | -                     | -1004 <sup>d</sup>     | -1214 <sup>d</sup>     | -1768 <sup>c</sup>     |

<sup>a</sup> irreversible. <sup>b</sup> TAA. <sup>c</sup> bridge. <sup>d</sup> PDI.

### 3. Weller-Approach and DFT computations

$$\Delta G_{1CS}^0 = \frac{N_A}{1000} z e (E_{ox}(D/D^+) - E_{red}(A/A^-)) - \frac{N_A e^2}{1000 \times 4\pi\epsilon_0} \left[ \left( \frac{1}{2r_D} + \frac{1}{2r_A} \right) \left( \frac{1}{\epsilon_r} + \frac{1}{\epsilon_s} \right) + \frac{1}{\epsilon_s d_{DA}} \right] \quad (1)$$

The redox potential difference of the donor and the acceptor (in Volt) corresponds to the energy gap of the final charge separated state and the ground state. Their potentials were determined by cyclic voltammetry and are given in Table S1. In eqn 1 the separated charges are extra stabilized by Coulomb attraction, which is taken into account by a Coulomb term. In this term the radii of the donor ( $r_D$ ) and acceptor ( $r_A$ ) were calculated from the corresponding Connolly Molecular Surfaces of the subunits optimization with Chem3D Ultra<sup>[6]</sup> and the centre to centre distance between them (in Meter). The donor-acceptor distances  $r_{DA}$  were determined using Gaussian09 at a B3LYP/6-31G\* level of theory.<sup>[7]</sup>  $N_A$  is Avogadro's constant,  $e$  the elementary charge,  $z$  the number of transferred charges.  $\epsilon_0$  is the vacuum permittivity,  $\epsilon_r$  is the permittivity of the solvent used for cyclic voltammetry and  $\epsilon_s$  is that for the solvent used in the photophysical experiment.

Internal reorganisation energies  $\lambda_i$  for CR ( $CS \rightarrow S_0$ ) were estimated from DFT calculations at B3LYP/6-31G\* level of theory via the NICG (neutral in cation geometry) method [8-9] and outer reorganization energies  $\lambda_o$  were calculated based on the Born model.[10-11]

The same methodology was applied to estimate the inner and solvent reorganization energy of the virtual CS' bridge states by using model dyads Ph-TTC-PDI and Ph-TTC-TAA, see Table S2.

**Table S2:** Energies and reorganisation energies of the model bridge-PDI dyads (for the D-B-<sup>1</sup>A\*  $\rightarrow$  D-B<sup>+</sup>-A<sup>-</sup> process) and model bridge-TAA dyads (for the D<sup>+</sup>-B-A<sup>-</sup>  $\rightarrow$  D-B<sup>+</sup>-A<sup>-</sup> process) in toluene

|                                    | $E_{DB^+A^-} / \text{eV}$ | $\lambda_{B1} = \lambda_v + \lambda_o / \text{eV}$ |                                    | $\lambda_{B2} = \lambda_v + \lambda_o / \text{eV}$ |
|------------------------------------|---------------------------|----------------------------------------------------|------------------------------------|----------------------------------------------------|
| <b>Ph-TTC(OMe)<sub>2</sub>-PDI</b> | 2.29                      | 0.37                                               | <b>Ph-TTC(OMe)<sub>2</sub>-TAA</b> | 0.36                                               |
| <b>Ph-TTC(Me)<sub>2</sub>-PDI</b>  | 2.79                      | 0.29                                               | <b>Ph-TTC(Me)<sub>2</sub>-TAA</b>  | 0.27                                               |
| <b>Ph-TTC(H)<sub>2</sub>-PDI</b>   | 3.01                      | 0.28                                               | <b>Ph-TTC(H)<sub>2</sub>-TAA</b>   | 0.26                                               |
| <b>Ph-TTC(Cl)<sub>2</sub>-PDI</b>  | 3.22                      | 0.29                                               | <b>Ph-TTC(Cl)<sub>2</sub>-TAA</b>  | 0.27                                               |
| <b>Ph-TTC(PAZ)-PDI</b>             | 3.29                      | 0.26                                               | <b>Ph-TTC(PAZ)-TAA</b>             | 0.24                                               |

In cyclovoltammetric experiments, an oxidation peak was only observable in case of the triad with the TTC(MeO)<sub>2</sub> bridge, from which a value of 2.29 eV was obtained for the free energy of formation of the bridge state D-B<sup>+</sup>-A<sup>-</sup> by the Weller method, see above. For the less electron rich derivatives, the oxidation potential of the bridge falls outside the accessible electrochemical window. To assess the energies of the bridge states in these other cases, we estimated this quantity for all bridges by calculating the energy difference between the Kohn-Sham HOMO energy of TTC and the corresponding LUMO energy of PDI. These values falling between 6.04 eV (TTC(OMe)<sub>2</sub>) and 7.04 eV (TTC(PAZ)) should give a reasonable estimate for the *relative* bridge state energies. Because the DFT energy differences calculated in that way do neither include Coulomb stabilization nor solvation effects in the CS' state, we added a constant shift value of 3.75 eV, defined in such a way as to yield the experimental value of 2.29 eV for the TTC(OMe)<sub>2</sub> bridge. The resulting adiabatic bridge energies for the <sup>1,3</sup>[D-B<sup>+</sup>-A<sup>-</sup>] states are collected in Tabel S2 together with the total bridge reorganization energy

The vertical bridge energies  $\Delta E_v(^1A^*B)$  and  $\Delta E_v(CSB)$  as defined in Fig. 5 and collected in Table 3 were obtained by the following equations with data from Table S2 and  $E_{DB1A^*} = 2.33$  eV and  $E_{D+BA^-} = 1.85$  eV:

$$\Delta E_v(^1A^*B) = E_{DB^+A^-} + \lambda_{B1} - E_{DB1A^*}$$

$$\Delta E_v(CSB) = E_{DB^+A^-} + \lambda_{B2} - E_{D^+BA^-}$$

The frontier orbitals and their energies of the bridge moieties were calculated at B3LYP/6-311G\*\*, see Table S3.

**Table S3:** HOMO and LUMO plots and their energies in eV of the bridge moieties and of TAA and PDI.

| B3LYP /<br>6-311+G** | HOMO                                                                                         | LUMO                                                                                          |
|----------------------|----------------------------------------------------------------------------------------------|-----------------------------------------------------------------------------------------------|
| (OMe) <sub>2</sub>   | 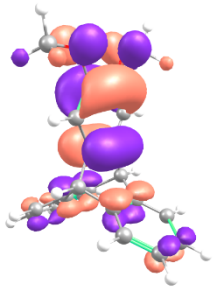 -5.44 eV |  -0.58 eV |
| (Me) <sub>2</sub>    |  -5.94 eV |  -0.58 eV |
| (H) <sub>2</sub>     |  -6.16 eV |  -0.64 eV |

|                   |                                                                                                          |                                                                                                  |
|-------------------|----------------------------------------------------------------------------------------------------------|--------------------------------------------------------------------------------------------------|
| (Cl) <sub>2</sub> | 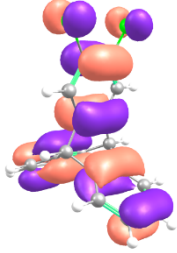<br>-6.37 eV            | <br>-1.12 eV   |
| (PAZ)             | <br>-6.29 eV            | <br>-2.62 eV   |
|                   | HOMO-1<br><br>-6.44 eV |                                                                                                  |
| TAA               | <br>-8.82 eV          | <br>-4.39 eV |
| PDI               | <br>-1.79 eV          | <br>0.60 eV  |

#### 4. Steady-state absorption spectroscopy

A JASCO V-670 UV/Vis/NIR spectrometer was used to measure the absorption spectra. Here, spectroscopic grade solvents from Sigma Aldrich and Acros Organics in 10 × 10 mm quartz-cuvettes from Starna were used and a cuvette with pure solvent was used as reference. In the

examined concentration range of  $10^{-7}$  –  $10^{-5}$  M no concentration dependent effects were observed.

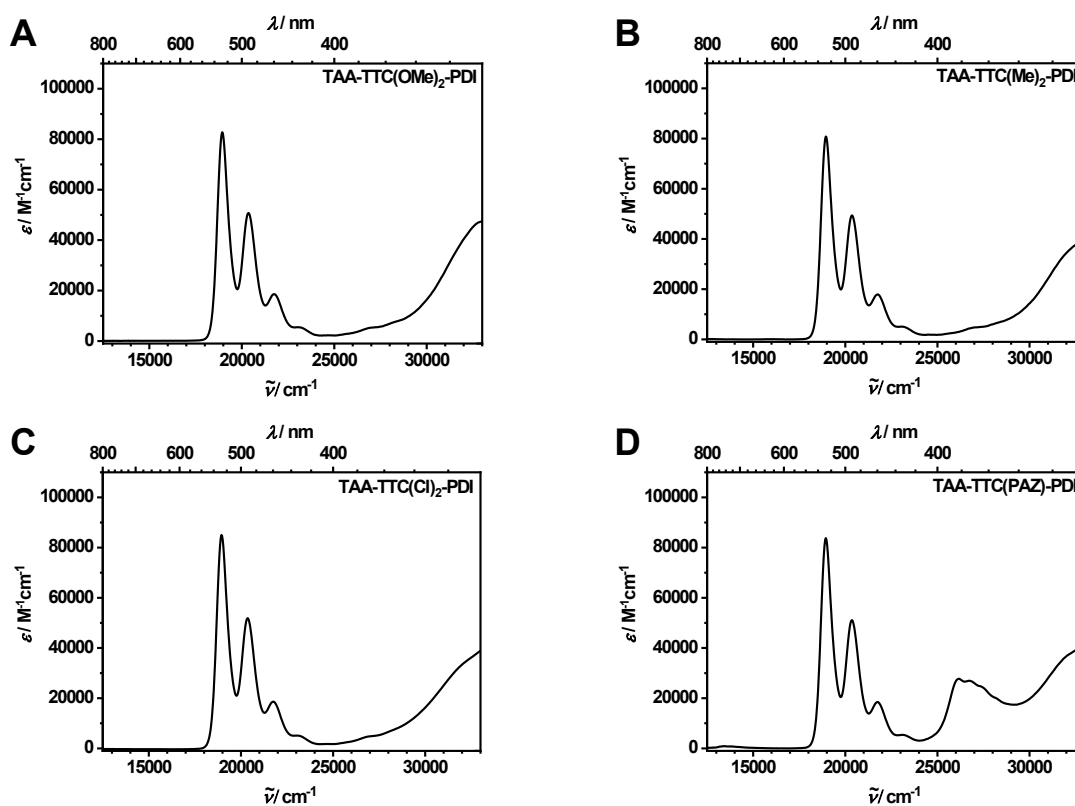

**Fig S48:** Absorption spectra of the triads in toluene at 298 K. Absorption spectrum from **TAA-TTC(H)<sub>2</sub>-PDI** in reference.<sup>[1]</sup>

**Table S4:** Absorption data of the triads in toluene at 298 K.

|                                     | $\tilde{\nu}_{\text{maxPDI}} / \text{cm}^{-1}$<br>( $\lambda_{\text{maxPDI}} / \text{nm}$ ) | $\epsilon_{\text{maxPDI}} / \text{M}^{-1}\text{cm}^{-1}$ |
|-------------------------------------|---------------------------------------------------------------------------------------------|----------------------------------------------------------|
| <b>TAA-TTC(OMe)<sub>2</sub>-PDI</b> | 18900 (528)                                                                                 | 82300                                                    |
| <b>TAA-TTC(Me)<sub>2</sub>-PDI</b>  | 18900 (528)                                                                                 | 81000                                                    |
| <b>TAA-TTC(H)<sub>2</sub>-PDI</b>   | 18900 (528)                                                                                 | 84400                                                    |
| <b>TAA-TTC(Cl)<sub>2</sub>-PDI</b>  | 18900 (528)                                                                                 | 85000                                                    |
| <b>TAA-TTC(PAZ)-PDI</b>             | 18900 (528)                                                                                 | 83800                                                    |



## 5. Steady-state emission spectroscopy

An Edinburgh Instruments FLS980 fluorescence lifetime spectrometer equipped with a 450 W Xenon lamp and a single photon counting photomultiplier R928P was used for the emission spectroscopy measurements. The measurements were done at r.t. in 10 × 10 mm quartz-cuvettes from Starna. All solvents were of spectroscopic grade (Sigma Aldrich, Acros Organics). The optical density of all samples was below 0.05 for the maximum absorption band of the PDI moiety.

Fluorescence quantum yields were determined using a calibrated integrating sphere and corrected for self-absorption.<sup>[12]</sup>

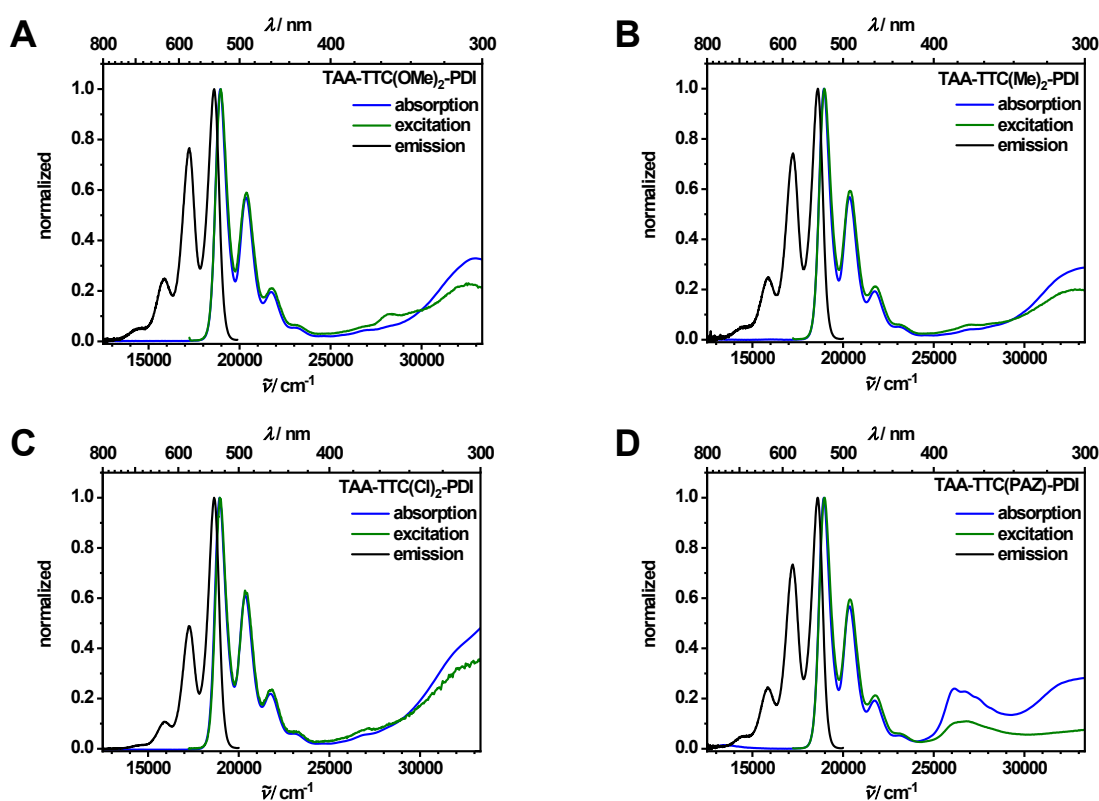

**Fig S49:** Normalised steady-state absorption (blue), excitation (green) and emission spectra (black) of the triads in toluene at 298 K. Emission spectra were recorded after excitation at 20400  $\text{cm}^{-1}$  (490 nm, 0-1 absorption band of the **PDI**) and excitation spectra were recorded by probing at 16900  $\text{cm}^{-1}$  (590 nm, 1-0 emission band of the **PDI**). Emission and excitation spectra were recorded at a concentration of  $5 \cdot 10^{-6} \text{ mol l}^{-1}$  and the absorption spectra at  $1 \cdot 10^{-5} \text{ mol l}^{-1}$ . Steady-state absorption, excitation and emission spectra from **TAA-TTC(H)<sub>2</sub>-PDI** in reference.<sup>[1]</sup>

**Table S5:** Emission maxima and fluorescence quantum yields in toluene at 298 K.

|                                     | $\tilde{\nu}_{\text{maxPDI}}^a / \text{cm}^{-1}$<br>( $\lambda_{\text{max}} / \text{nm}$ ) | $\phi_f$ |
|-------------------------------------|--------------------------------------------------------------------------------------------|----------|
| <b>TAA-TTC(OMe)<sub>2</sub>-PDI</b> | 18600 (537)                                                                                | 0.01     |
| <b>TAA-TTC(Me)<sub>2</sub>-PDI</b>  | 18600 (537)                                                                                | 0.03     |
| <b>TAA-TTC(H)<sub>2</sub>-PDI</b>   | 18600 (537)                                                                                | 0.04     |
| <b>TAA-TTC(Cl)<sub>2</sub>-PDI</b>  | 18600 (537)                                                                                | 0.08     |
| <b>TAA-TTC(PAZ)-PDI</b>             | 18600 (537)                                                                                | 0.09     |

## 6. Transient absorption spectroscopy

### 6.1. fs-transient absorption spectroscopy

The Transient absorption setup (TAS) consists of a one-box femtosecond laser system "Solstice" from Newport Spectra Physics, a "HELIOS" transient absorption spectrometer (TASp) from Ultrafast Systems, a home-built NOPA, and a "TOPAS-C" from LightConversion. The fundamental wavelength from the Solstice is  $12500 \text{ cm}^{-1}$  (800 nm) with a pulse length of 100 fs and a repetition rate of 1 kHz. The HELIOS spectrometer is equipped with two channels, one used for measurement and one for reference. It is equipped with a fibre-coupled linear CMOS sensor with a sensitivity from  $31700 \text{ cm}^{-1}$  (315 nm) to  $10800 \text{ cm}^{-1}$  (925 nm) and an intrinsic spectral resolution of 1.5 nm. The white light continuum (WLC) is created by an oscillating 3 mm thick  $\text{CaF}_2$  crystal. The latter was pumped by the TOPAS-C output at  $10000 \text{ cm}^{-1}$  (1000 nm) to obtain a gapless WLC from  $29400 \text{ cm}^{-1}$  (340 nm) to  $10900 \text{ cm}^{-1}$  (915 nm). A  $25000 \text{ cm}^{-1}$  (400 nm) long pass filter and a  $11100 \text{ cm}^{-1}$  (900 nm) short pass filter were used to chop the probe wavelength range. The pump beam from the TOPAS-C for the WLC is guided over a linear stage which provides a time delay up to 7 ns. The step size for the first 4 ps is 20 fs and afterwards the steps increase in a logarithmic way up to 200 fs. The angle in space between both beams was  $10^\circ$  and the angle between the polarization directions between pump and probe was  $54.7^\circ$ . The pump beam for the sample was produced by a home-built NOPA at  $18900 \text{ cm}^{-1}$  (528 nm) and the pulse lengths were shorter than 40 fs in a Gaussian fit. The pulse shape was close to the bandwidth limitation. The instrument response function derived from the coherent artefact was approx. 100 fs. All samples were dissolved in toluene from Merck. The measurements were done in a cuvette with an optical path length of 0.2 mm, a window thickness of 0.1 mm and pumped with 30 nJ.

GLOTARAN (v. 1.2) was used to analyse the recorded time resolved spectra by a global deconvolution using a sequential model to yield evolution associated difference spectra (EADS).<sup>[13]</sup> The white light dispersion (chirp) was corrected by fitting a third order polynomial to the cross-phase modulation signal of the pure solvent.

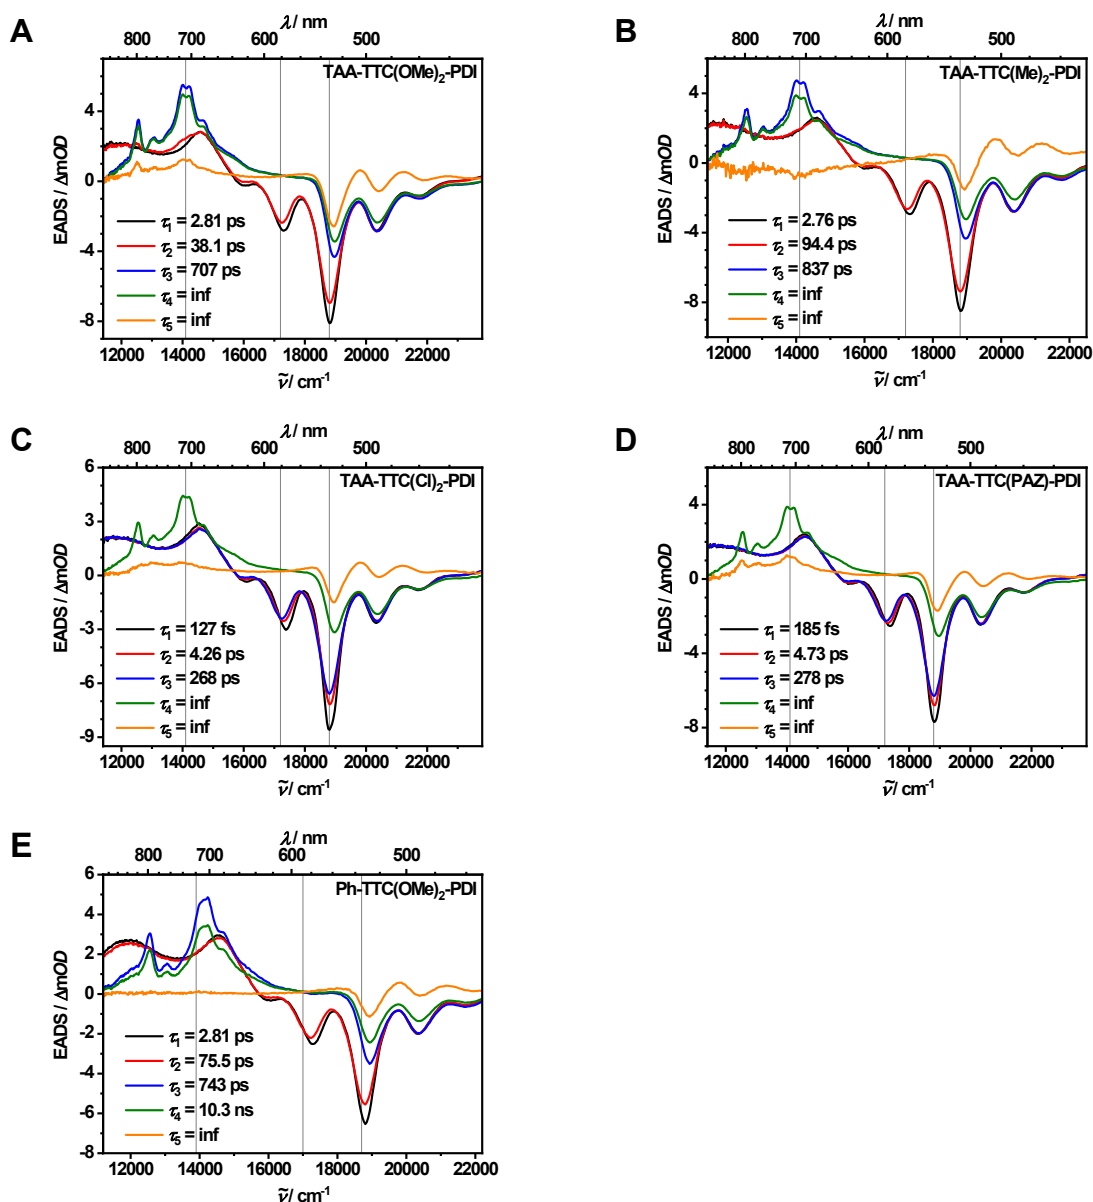

**Fig S50:** Evolution associated difference spectra (EADS) in toluene at 298 K after pumping at  $18900\text{ cm}^{-1}$  (528 nm) and probing with continuous white light between  $11500\text{ cm}^{-1}$  (870 nm) and  $23800\text{ cm}^{-1}$  (420 nm). The EADS of **TAA-TTC(H)<sub>2</sub>-PDI** can be found in reference.<sup>[1]</sup>

## 6.2. Target fits

A target fit of the transient map was performed under the assumption that at  $20400\text{ cm}^{-1}$  ( $490\text{ nm}$ ) the EADS of excited PDI and the PDI radical anion only show GSB and no superimposed ESA or SA. For the triplet PDI, however, this is not true as this shows a strong ESA in this spectra region. Therefore, species associated difference spectra (SADS) of the singlet PDI and the CS state should possess the same (but unknown) extinction coefficient at  $20400\text{ cm}^{-1}$  ( $490\text{ nm}$ ). Therefore, we adjusted the efficiencies of depopulation channels of all pertinent states in a way, that this criterion concerning the extinction coefficient was met, using a global target fit. In this way, the rate constant for depopulation of a specific state changed during the global fit. In comparison, in the evolution associated difference spectra, where a sequential model was assumed, all efficiencies are unity. The quotient of the efficiency of the charge separation channel and the lifetime of the excited PDI state then gives the rate constants for the charge separation channel.

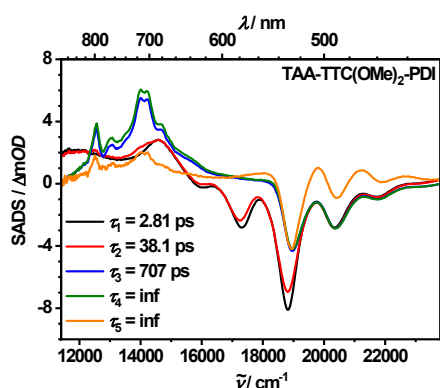

$$k_{CS} = 2.6 \cdot 10^{10} \text{ s}^{-1}$$

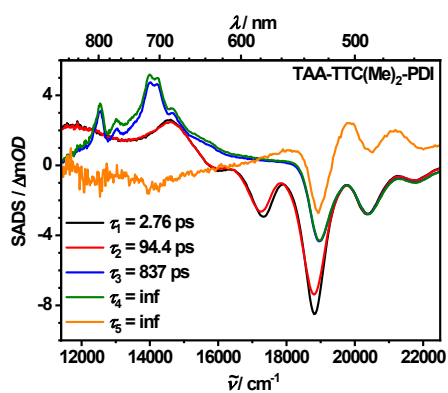

$$k_{CS} = 1.1 \cdot 10^{10} \text{ s}^{-1}$$

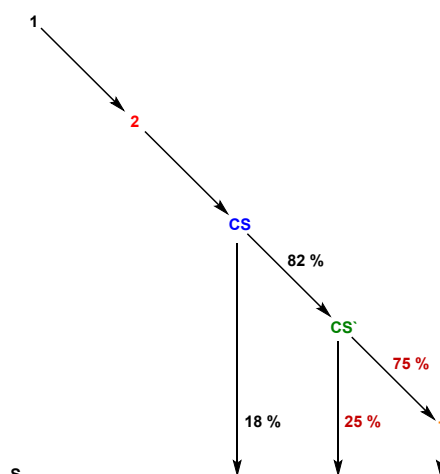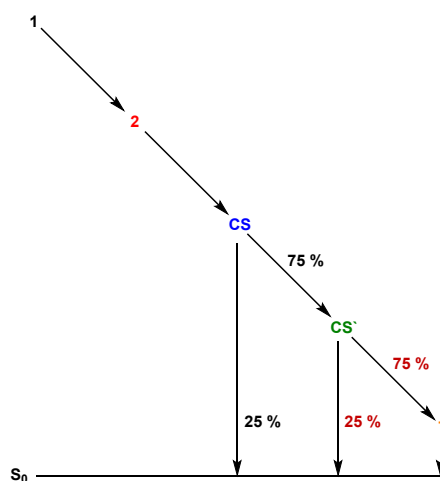

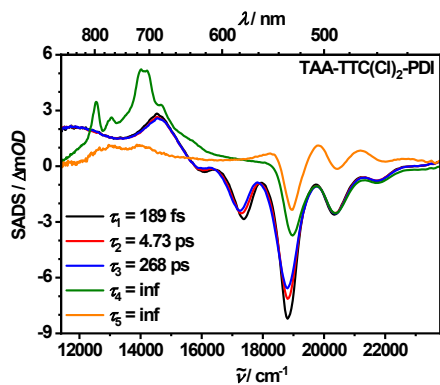

$$k_{CS} = 3.7 \cdot 10^9 \text{ s}^{-1}$$

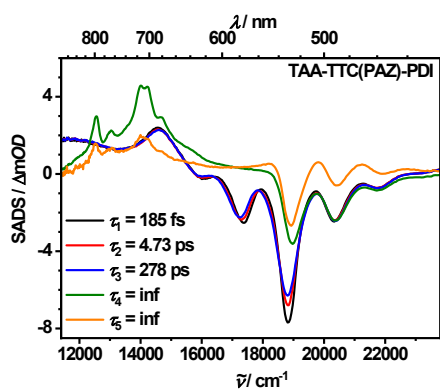

$$k_{CS} = 3.1 \cdot 10^9 \text{ s}^{-1}$$

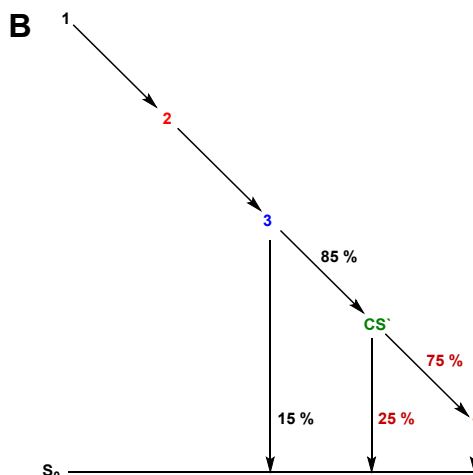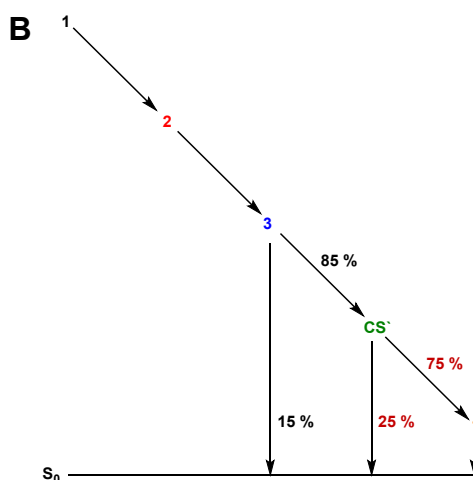

**Fig S51:** Target fits of the transient maps under the assumption that all SADS spectra match at ca. 20400  $\text{cm}^{-1}$  (490 nm). Target fit of **TAA-TTC(H)<sub>2</sub>-PDI** can be found in reference.<sup>[1]</sup>

### 6.3. ns-transient absorption spectroscopy

The ns-transient absorption spectroscopy measurements were done using an Edinburgh LP 920 laser flash spectrometer using an EKSPLA NT340 Nd:YAG laser with integrated optical parametric oscillator. The white light was generated by a 450 W Xe arc flash lamp in which the white light and the pump light beams were perpendicular to each other. The used solvent was of spectroscopic grade from thermoScientific, which was degassed by at least 7 freeze pump thaw cycles. Sample preparation was carried out in a nitrogen filled glovebox in 10 x 10 mm quartz-cuvettes equipped with a *Young's* valve. In a concentration range of  $10^{-6}$  to  $10^{-5}$  M no bimolecular processes were observed. All samples were excited with approx. 5 ns laser pulses (ca. 1.2 mJ pulse energy) with a 10 Hz repetition rate at the maximum ground state absorption of the respective PDI moiety at  $18900\text{ cm}^{-1}$  (528 nm). The transient maps were obtained by measuring temporal decay profiles in 4 nm steps between  $25000\text{ cm}^{-1}$  (400 nm) and  $12500\text{ cm}^{-1}$  (800 nm). The decay profiles were corrected for fluorescence. The decay curves were deconvoluted with the instrumental response function using the spectrometer L900 software.

The magnetic field dependent measurements were performed using a GMW Associates C-frame electromagnet 5403 (pole diameter = 76 mm, pole face = 38 mm, axial hole in poles 6.35 mm, pole gap = 13 mm) implemented in the aforementioned laser set-up. The magnetic field strength was controlled using a Teslameter (Projekt Elektronik GmbH Berlin) where the sensor was embedded in a neutral cuvette and placed at the side of the pole face. The stability of all samples was checked by repeatedly testing selected magnetic fields as well as comparing steady-state absorption spectra that were recorded at the beginning and the end of all measurements.

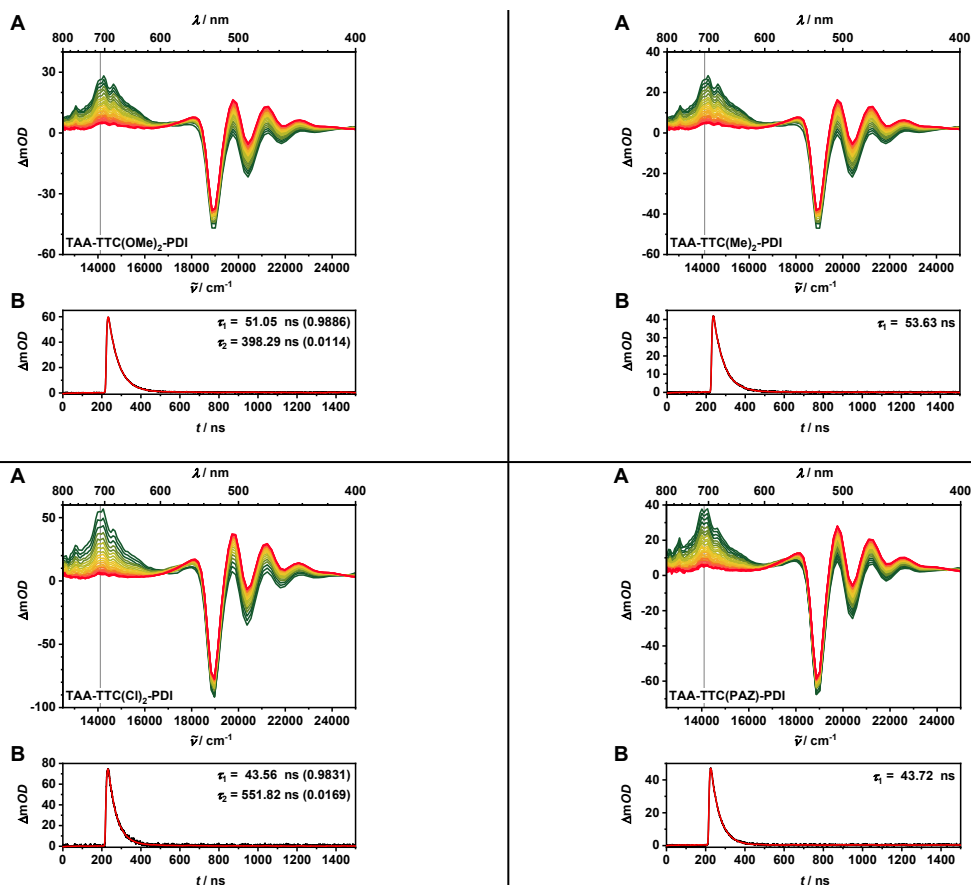

**Fig S52: A:** ns-transient maps in toluene at 298 K after excitation at  $18900 \text{ cm}^{-1}$  (528 nm) and probing with continuous white light between  $12500 \text{ cm}^{-1}$  (800 nm) and  $25000 \text{ cm}^{-1}$  (400 nm). The displayed spectra are at 7 ns steps with early times shown in dark green and later times in red. **B:** CSS decay curve (black) with the corresponding deconvolution fit (red) at  $14100 \text{ cm}^{-1}$  (grey line in **A**). Transient map of **TAA-TTC(H)<sub>2</sub>-PDI** can be found in reference.<sup>[1]</sup>

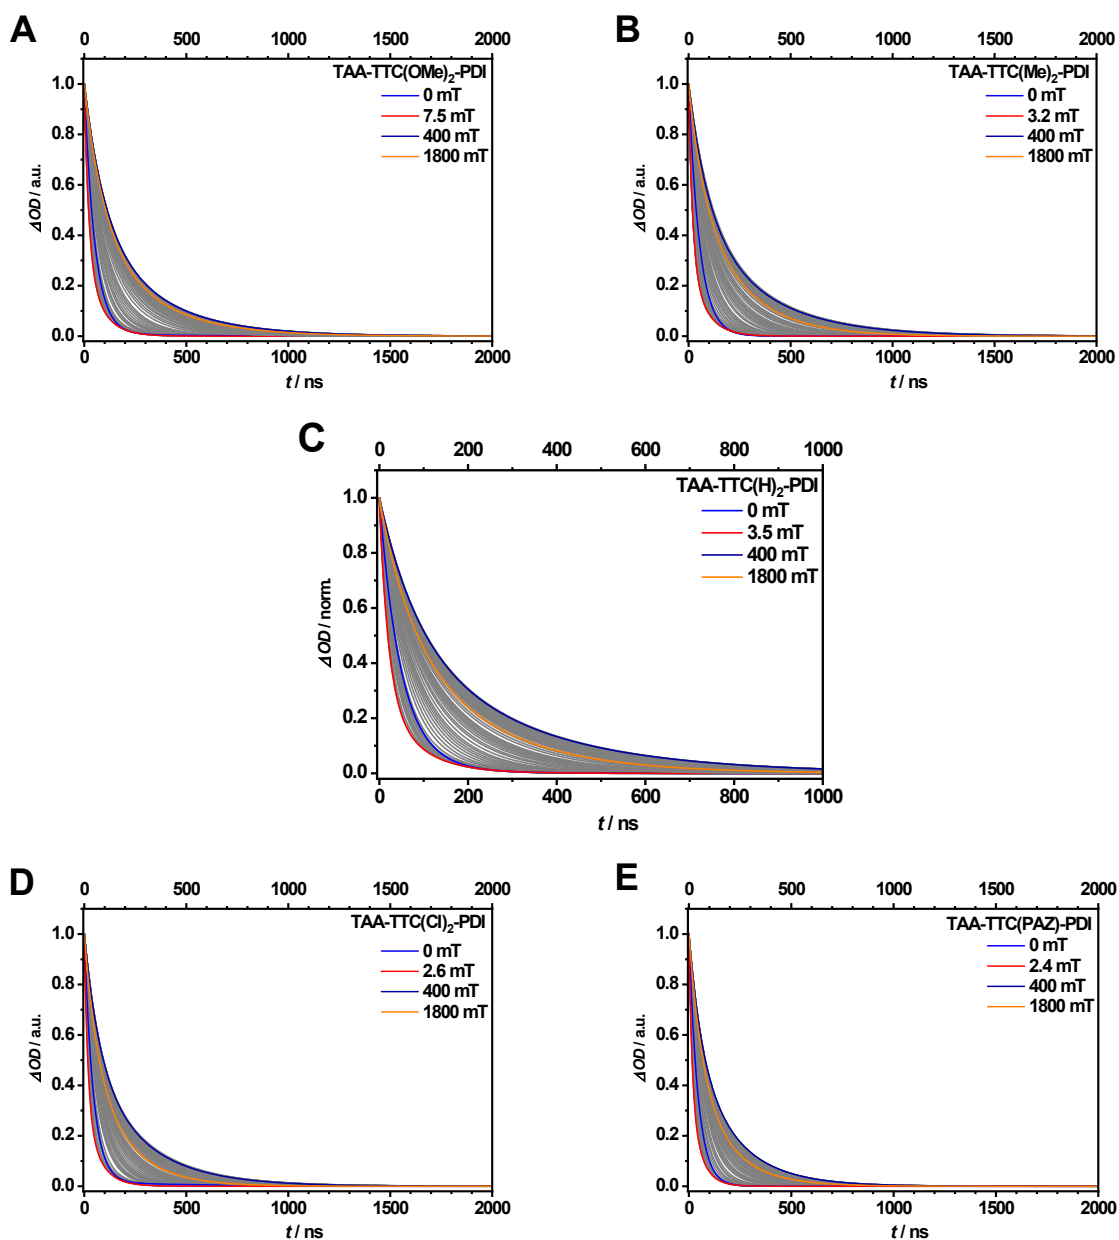

**Fig S53:** Multiexponential fit functions of the transient absorption decay profiles at selected magnetic fields for all triads in toluene at 298 K after pumping at  $18900\text{ cm}^{-1}$  (528 nm) and probing at  $14100\text{ cm}^{-1}$  (710 nm).



**Table 6:** Selected CSS lifetimes  $\tau$  and the corresponding amplitudes  $a$  of the triads in toluene obtained by using a deconvolution fit on the ns-TA decay curves. The magnetic fields given correspond to the highlighted curves in Fig S53.

|                                     | external<br>magnetic<br>field | $\tau_1$ / ns | $a_1$  | $\tau_2$ / ns | $a_2$  |
|-------------------------------------|-------------------------------|---------------|--------|---------------|--------|
| <b>TAA-TTC(OMe)<sub>2</sub>-PDI</b> | 0 mT                          | 51.05         | 0.9886 | 398.29        | 0.0114 |
|                                     | 7.5 mT                        | 20.90         | 0.6771 | 79.11.        | 0.3229 |
|                                     | 400 mT                        | 98.62         | 0.5278 | 313.85        | 0.4722 |
|                                     | 1800 mT                       | 93.20         | 0.5263 | 285.65        | 0.4737 |
| <b>TAA-TTC(Me)<sub>2</sub>-PDI</b>  | 0 mT                          | 53.63         | 1.0000 |               |        |
|                                     | 3.2 mT                        | 18.50         | 0.6765 | 75.42         | 0.3235 |
|                                     | 400 mT                        | 95.48         | 0.4923 | 324.02        | 0.5077 |
|                                     | 1800 mT                       | 70.30         | 0.3651 | 227.57        | 0.6349 |
| <b>TAA-TTC(H)<sub>2</sub>-PDI</b>   | 0 mT                          | 46.34         | 0.8750 | 94.59         | 0.1250 |
|                                     | 3.5 mT                        | 20.09         | 0.7105 | 79.53         | 0.2895 |
|                                     | 400 mT                        | 84.64         | 0.4737 | 284.49        | 0.5263 |
|                                     | 1800 mT                       | 65.72         | 0.3919 | 198.63        | 0.6081 |
| <b>TAA-TTC(Cl)<sub>2</sub>-PDI</b>  | 0 mT                          | 43.56         | 0.9831 | 551.82        | 0.0169 |
|                                     | 2.6 mT                        | 16.98         | 0.6887 | 69.65         | 0.3113 |
|                                     | 400 mT                        | 75.54         | 0.4941 | 268.21        | 0.5059 |
|                                     | 1800 mT                       | 58.71         | 0.4355 | 180.44        | 0.5645 |
| <b>TAA-TTC(PAZ)-PDI</b>             | 0 mT                          | 43.72         | 1.0000 |               |        |
|                                     | 2.4 mT                        | 14.46         | 0.6129 | 52.11         | 0.3871 |
|                                     | 400 mT                        | 61.86         | 0.4426 | 208.25        | 0.5574 |
|                                     | 1800 mT                       | 64.26         | 0.5323 | 176.12        | 0.4677 |

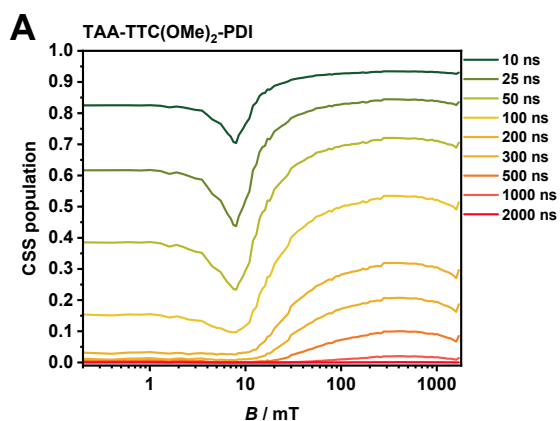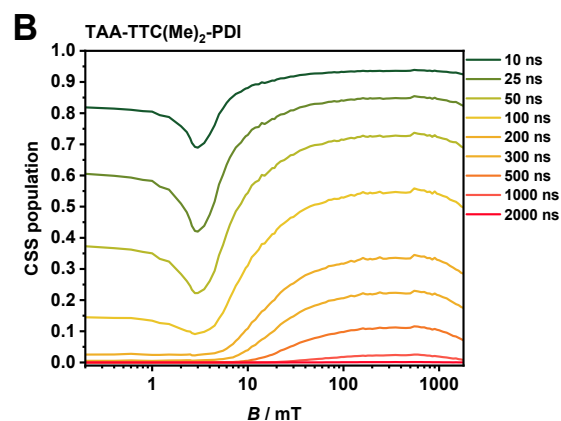

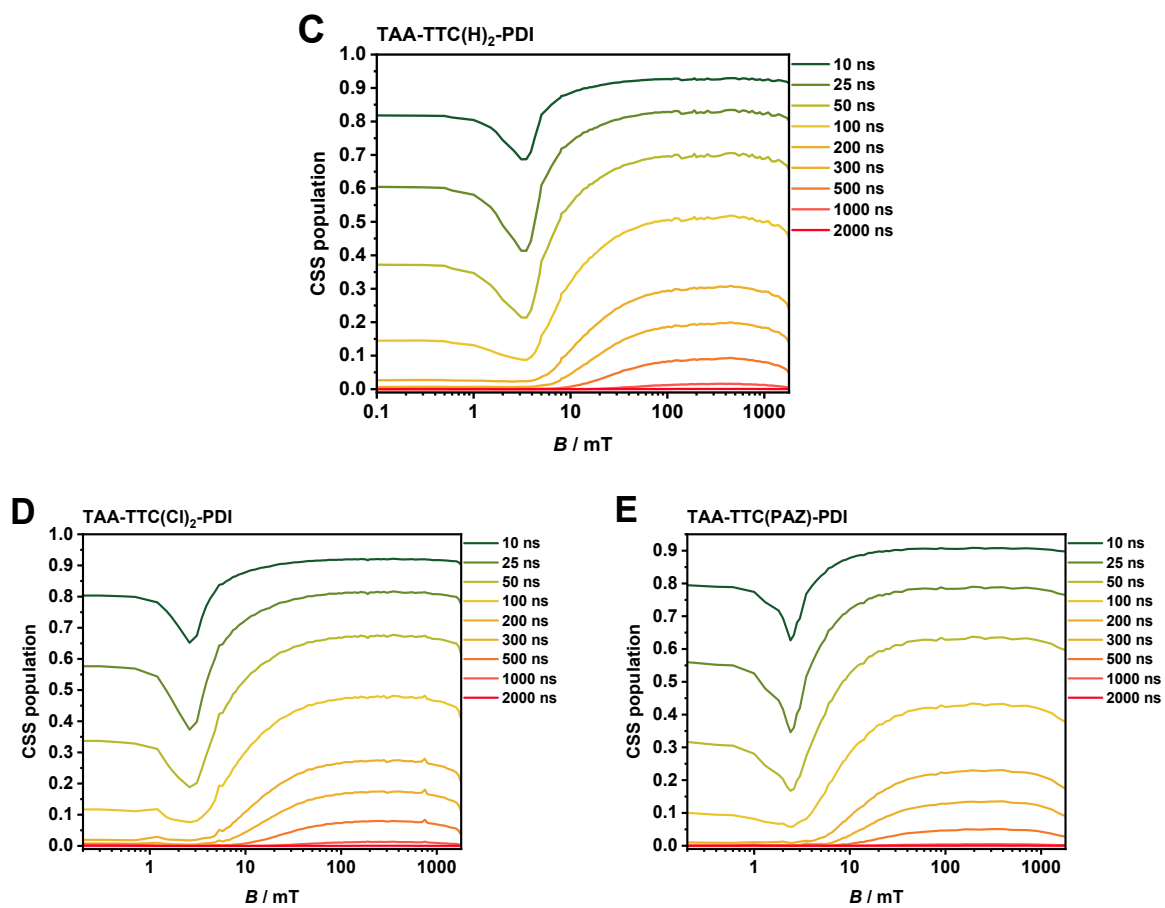

**Fig S54:** MARY plots in toluene at 298 K.

## 7. Error limits for $k_S$

As shown in the plot in Fig. S55, the maximum values of  $k_S$  are  $1.7 \times 10^5 \text{ s}^{-1}$  for **TAA-TTC(H)<sub>2</sub>-PDI** and  $1 \times 10^6 \text{ s}^{-1}$  for **TAA-TTC(OMe)<sub>2</sub>-PDI** and **TAA-TTC(PAZ)-PDI** for  $T_{\text{long}} = \infty$ . Decreasing  $T_{\text{long}}$  to the limiting values shown on the vertical axis and setting  $k_S$  to zero yields the same  $k(B)$  curve in the quantum simulation. Thus, for the pertinent derivatives, possible values of  $k_S$  range in the intervals defined by the maximum value and zero. On the other hand, if one allows for an average deviation of 5% in the  $k(B)$  fit, this would allow for  $k_S = 6 \times 10^5$  in the cases of **TAA-TTC(H)<sub>2</sub>-PDI**, **TAA-TTC(Me)<sub>2</sub>-PDI**, and **TAA-TTC(Cl)<sub>2</sub>-PDI**. Therefore, this value was taken as an upper limit of  $k_S$  in these cases.

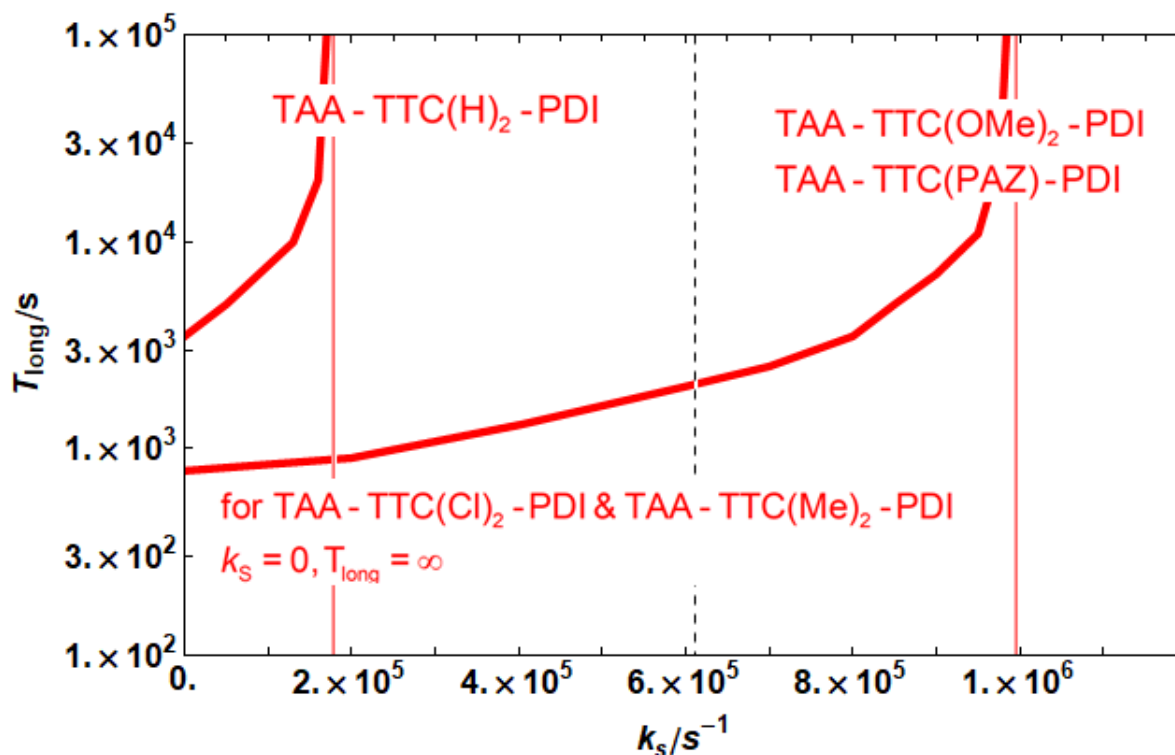

**Fig. S55**  $T_{\text{long}}$  vs  $k_S$  as related to each other by the condition of producing equivalent simulations of  $k(B)$ . The dashed vertical line indicates the  $k_S$  value for an 5% error in  $k(B)$  in the cases of **TAA-TTC(H)<sub>2</sub>-PDI**, **TAA-TTC(Me)<sub>2</sub>-PDI**, and **TAA-TTC(Cl)<sub>2</sub>-PDI**.

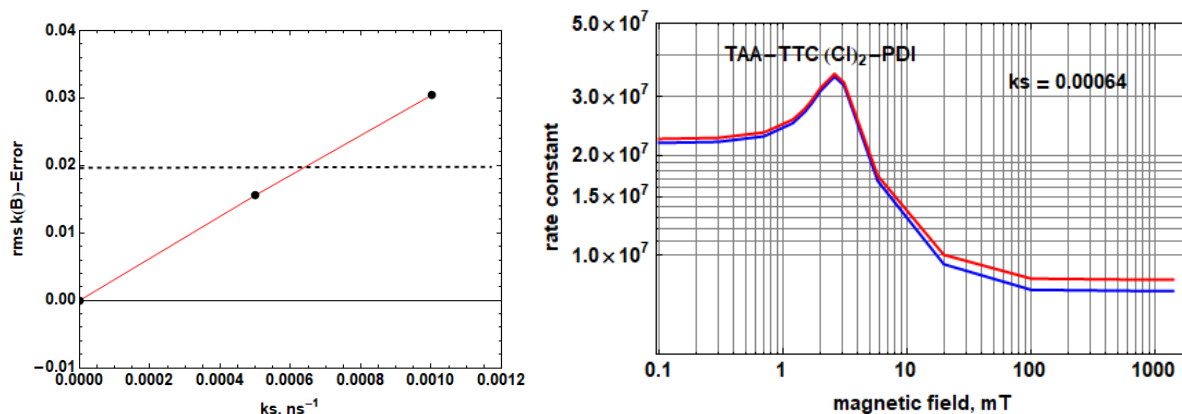

**Fig. S56** Left: dependence of rms error of  $\text{Log}(k(B))$  on value of  $k_S$ . A value of 0.2 correspond to an average error of 5% for  $k(B)$ . Right: standard fit curve (blue) and deviation (red) for  $k_S = 0.00064 \text{ ns}^{-1}$ .

## 8. Necessity to adapt the effective hyperfine coupling constant

In the following figures, simulations of the  $k(B)$  spectrum for the case of **TAA-TTC(OMe)<sub>2</sub>-PDI** are shown. The parameters  $k_d = 0.15$ ,  $\tau_c = 0.6$ ,  $T_{\text{long}} = \infty$ ,  $\Delta a_N = 1.51 \text{ mT}$  were kept fixed (time units ns). As shown in Fig. S57b, changing only the value of  $J$ , cannot account for the differences in the  $k(B)$  spectra in the present series of triads, because a mere change of  $J$  would lead to a strong effect on the value  $k(B)$  at zero field. (cf. also Section 9)

Increasing  $k_T$  compensates for the change of  $k(0)$ , but it also leads to a broadening of the resonance line to the extent that it disappears completely ( $k_T = 3$ ). This effect follows from the lifetime broadening of the triplet level. The  $2J$  value corresponds to a frequency of 1.34. The  $k_T$  value of 3 is twice as large. For the experimental curve, the ratio of  $k(B)$  values between zero field and the maximum amounts to a value of 1.60. This ratio is also approximately obtained for  $k_T = 1.0$ , in which case the ratio of zero-field and high-field values is 2.94. The theoretical curve in Fig. S57 d) just corresponds to the experimental one, except for the absolute values which are too small by a factor of 1.5. From Figs. S57a-h it follows that the situation represented by Fig.S57d is the best that can be achieved in terms of similarity of experimental and theoretical curves. A mere vertical shift of the curve can be only achieved if the effective hyperfine coupling is increased. Such attempts with changes of the isotropic hyperfine coupling constant  $a_N$ , the isotropic hyperfine coupling constant of the TAA-nitrogen, are shown in the diagrams S57i-k, wherein the effective value of  $a_N$  is increased

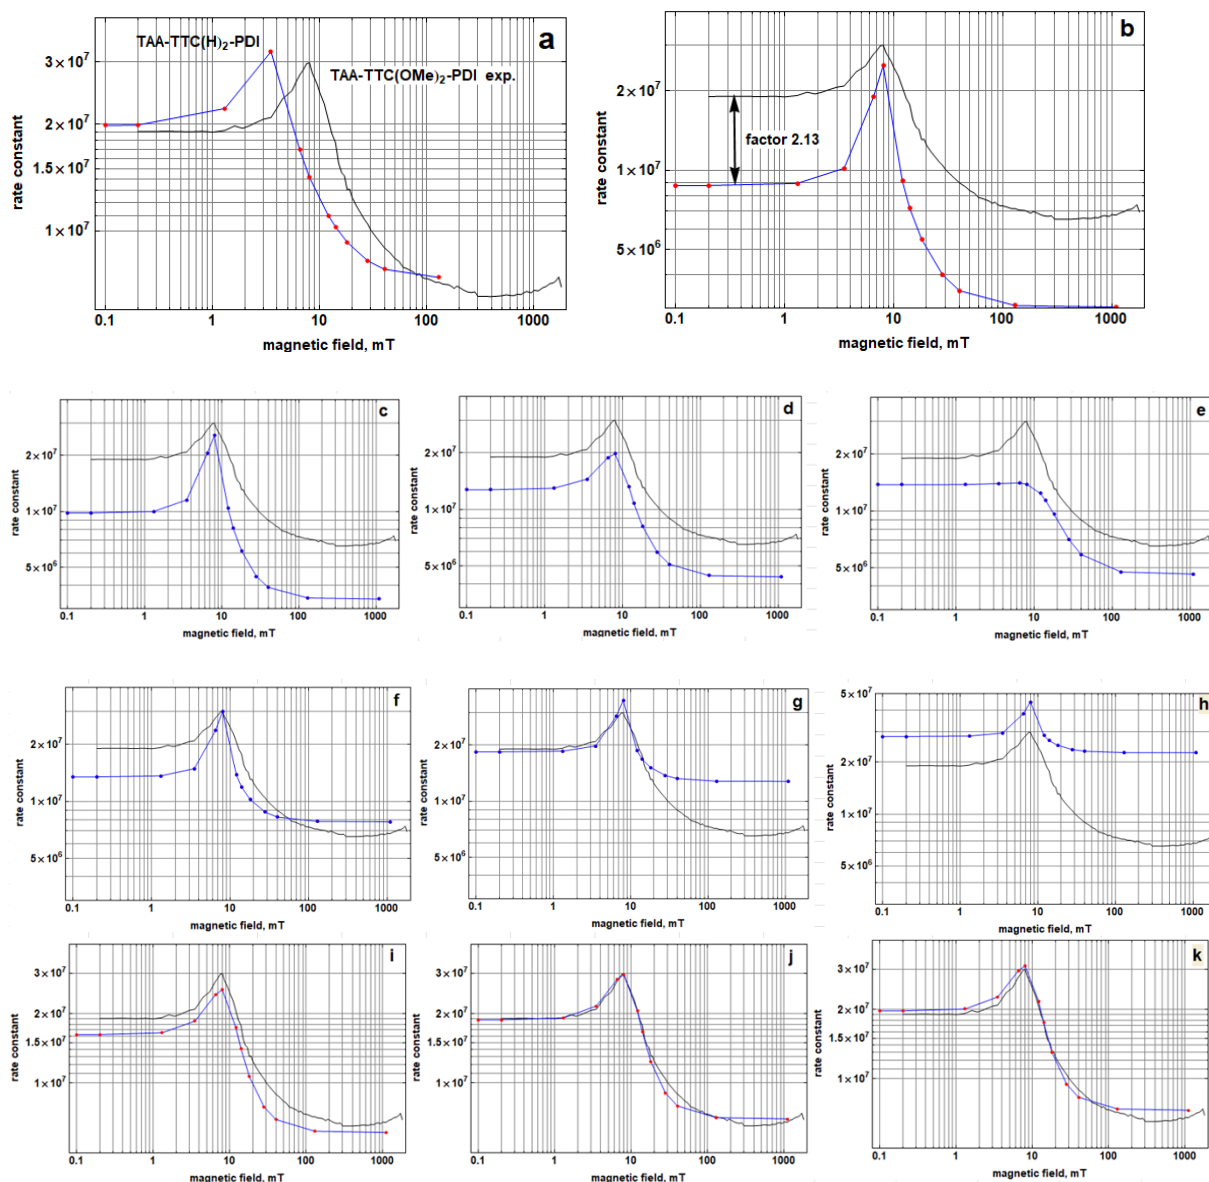

**Fig. S57.** a) Comparison of  $k(B)$  spectra of **TAA-TTC(H)<sub>2</sub>-PDI** with **TAA-TTC(OMe)<sub>2</sub>-PDI**. For **TAA-TTC(H)<sub>2</sub>-PDI** the best theoretical fit is shown with  $k_S = 0.0002 \text{ ns}^{-1}$ ,  $k_T = 0.15 \text{ ns}^{-1}$ ,  $J = 1.55 \text{ mT}$ ,  $a_N = 0.926 \text{ mT}$ . The spectra appear to be only horizontally displaced. The  $B_{\text{max}}$  value rises from 3.4 mT to 7.9 mT. b) Simulation (red data points): apart from the  $J$ -value of 3.8 mT all other parameters for **TAA-TTC(H)<sub>2</sub>-PDI** were kept as in a). c)–e) Variation of  $k_T$  through the values 0.15 (c), 1.0 (d), 3.0 (e), other parameter values as in (b). Increasing  $k_T$  by a factor of 10 causes only a relatively little increase of  $k(B)$  by a factor of 1.6. This demonstrates that the rate constant  $k(B)$  is mainly determined by the ISC-process. The same conclusion follows from the fact that  $k(B)$  in high field is reduced to about 1/3 of the  $k(B)$ -value at zero field (cf. also Section 9); f–h) Variation of  $k_S$  through the values 0.005 (f), 0.01 (g), 0.02 (h), other parameter values as in (b). As long as  $k_S$  is small compared to  $k_T$ , there are no significant changes. An

Caption to Fig. S57 continued

increase by a factor of 25 (cf. Fig S57 b and f) causes  $k(0)$  to grow just by a factor of 1.5. At higher values of  $k_S$ , the effect on  $k(0)$  becomes stronger. Important observation: the greater  $k_S$ , the closer the  $k(B)$  values at low-field and high-field approach each other. Since their experimental ratio is close to 3,  $k_S$  must definitely range far below  $k_T$ . i-k): Variation of effective hfc  $a_N$ . (1.1 mT (i), 1.25 mT (j), 1.3 mT (k)). Other parameter values as in (b). A value of  $a_N = 1.25$  mT seems to be the optimum.

### 9. Pure $J$ -effect on $k(B)$ spectra

We consider the isolated role of exchange interaction  $J$  on the recombination kinetics of CSS, when created in the singlet state and recombining through the triplet state. A standard set of kinetic parameters is kept constant while varying the magnetic field for different values of  $J$  (Fig. S58). The  $k(B)$  spectra exhibit the characteristic  $2J$ -resonances. For  $J$  smaller than several times  $a_N$ , the resonance maxima appear at fields somewhat larger than  $2J$ , because of the finite hyperfine splitting. In Fig. S58 it is important to observe, that after an initial decrease the maximum value of the  $k(B)$  resonance approaches a limiting value for high values of  $J$ . On the other hand, the low-field and high-field values decrease much faster than the maximum value, such that the  $2J$ -resonance appears sharper and sharper, as  $J$  increases.

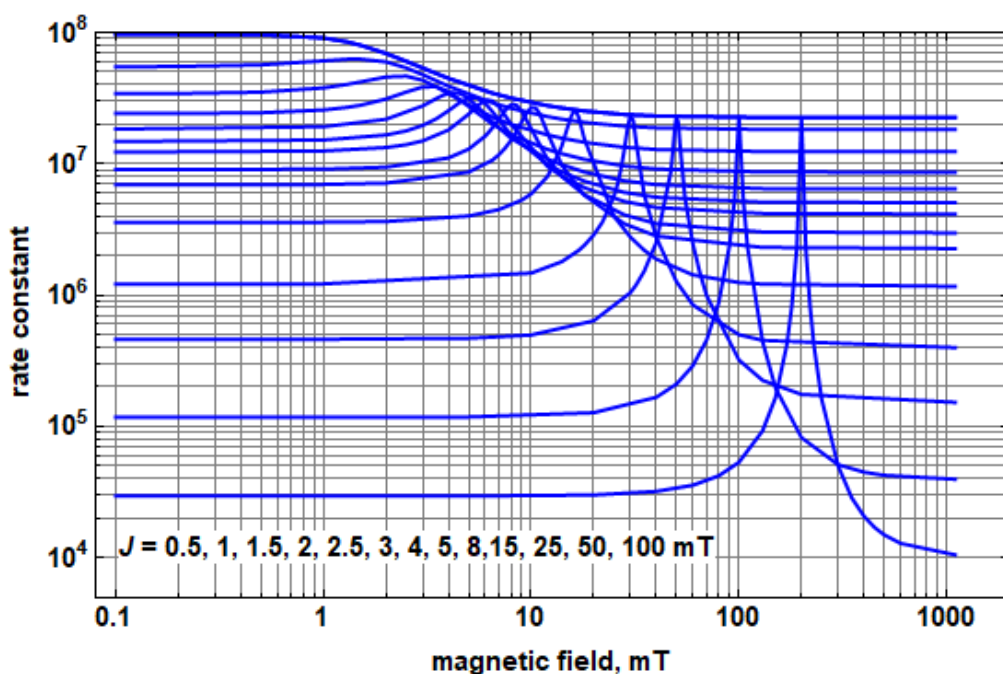

**Fig. S58** Variation of  $k(B)$  spectra with exchange energy  $J$ . The following parameters are kept constant:  $k_T = 0.3 \text{ ns}^{-1}$ ,  $k_S = 0 \text{ ns}^{-1}$ ,  $k_{STD} = 0.1 \text{ ns}^{-1}$ ,  $T_{\text{long}} = \text{infinity}$ ,  $\tau = 0.6 \text{ ns}$ ,  $a_N = 1.0 \text{ mT}$ .

## 10 Discussion of dephasing rate constant $k_{\text{STD}}$

**Table 4 from Ref. [1]** Results of dynamical angular distribution.

|             | $\Pi$  | $\Delta$ | $\Delta / \Pi$ | $J / \text{mT}$ | $\Delta J / \text{mT}$ | $\tau_J / \text{ps}$ | $k_{\text{STD,th}} / \text{ns}^{-1}$ | $k_{\text{STD}} / \text{ns}^{-1}$ |
|-------------|--------|----------|----------------|-----------------|------------------------|----------------------|--------------------------------------|-----------------------------------|
| <b>Me23</b> | 0.0017 | 0.0042   | 2.48           | 0.25            | 0.62                   | 3.3                  | 0.00015                              | : 0                               |
| <b>Me2</b>  | 0.012  | 0.020    | 1.51           | 1.55            | 2.34 <sup>a</sup>      | 4.1                  | 0.0030                               | 0.15                              |
| <b>Me3</b>  | 0.010  | 0.018    | 1.72           | 1.85            | 3.19                   | 4.2                  | 0.0053                               | 0.21                              |
| <b>Me0</b>  | 0.070  | 0.066    | 0.94           | 6.5             | 6.12                   | 4.5                  | 0.021                                | 1.3                               |

<sup>a</sup>a typo ("2.43") in Ref. [1] was corrected

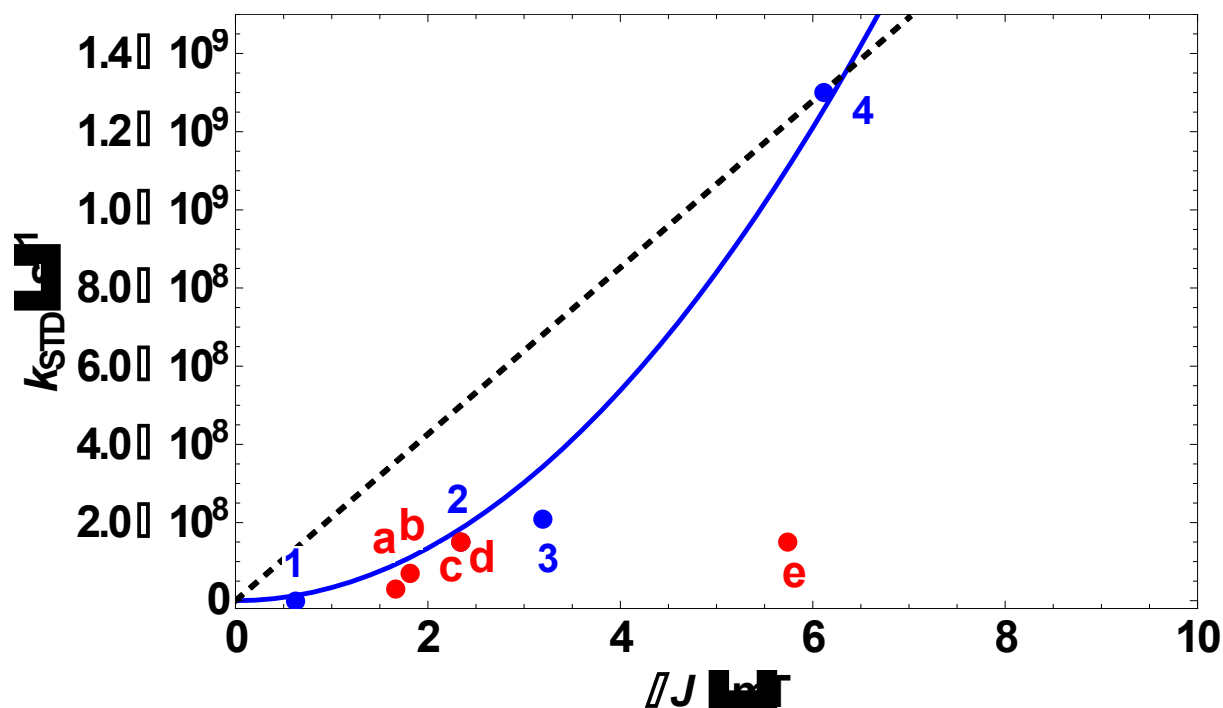

**Fig. S59** Rate constant of singlet/triplet dephasing versus standard deviation of  $J$  under dynamic internal rotational motions of triad backbone. The data points in blue refer to the results of the previous paper,<sup>1</sup> the numbers indicating the triads **Me23** (1), **Me2** (2), **Me3** (3), and **Me0** (4). The data points in red refer to the triads from the present paper, viz. **TAA-TTC(PAZ)-PDI** (a), **TAA-TTC(Cl)<sub>2</sub>-PDI** (b), **TAA-TTC(H)<sub>2</sub>-PDI** (c), **TAA-TTC(Me)<sub>2</sub>-PDI** (d), and **TAA-TTC(OMe)<sub>2</sub>-PDI** (e). Triads 2 and c are identical. Therefore, their data points overlap each other perfectly. Triad d has the same values, accidentally.

In Ref. [1], the diagram shown in Fig. S59 with the data points in blue was presented for the triads with no modified TTC bridge, but with partial blockings of internal backbone rotations by Me substituent. For those triads, the  $\Delta J$  values were estimated by scaling the standard deviation of the cosine square products along the four backbone angles with a factor that matches the average of the cosine square products to the experimentally observed  $J$  value. If we assume that this scaling factor resulting from the backbone dynamics is not changed by the TTC substituents, we can use the factor 1.55/1.51 determined for **Me2** in ref.[1] (cf. Table 4), also for the present triads, since it has the same two Me blocking elements as the latter. Thus, we can obtain their  $\Delta J$  values from their experimental  $J$  values. The resulting data points for the previous and the present triads can be compared in Fig. S59. While the data points a-d reasonably fall within the series of the previous triads, corresponding to a square relation between  $k_{\text{STD}}$  and  $\Delta J$ , the data point with the highest  $\Delta J$  does not show correspondingly enhanced  $k_{\text{STD}}$ , which means that  $\Delta J$  is overestimated for **TAA-TTC(OMe)<sub>2</sub>-PDI** (e). From our previous investigations it is quite unlikely, that the discrepancy should be due to a variation of the autocorrelation time  $\tau_j$ . On the other hand a special behaviour of  $\Delta J$  in compound (e) goes along with another peculiar behaviour of the latter triad: it seems strange that the strong increase of  $\Delta J$  does not cause a decrease in the singlet/triplet conversion rate at zero field, as discussed in sections **S8** and **S9**.

- [1] C. Roger, A. Schmiedel, M. Holzapfel, N. N. Lukzen, U. E. Steiner, C. Lambert, *Phys. Chem. Chem. Phys.* **2024**.
- [2] J. C. C. Atherton, S. Jones, *Tetrahedron* **2003**, *59*, 9039-9057.
- [3] L. Friedman, F. M. Logullo, *J. Am. Chem. Soc.* **1963**, *85*, 1549-1549.
- [4] N. Miyaura, A. Suzuki, *J. Chem. Soc., Chem. Commun.* **1979**, 866-867.
- [5] K. Baumgärtner, M. Hoffmann, F. Rominger, S. M. Elbert, A. Dreuw, M. Mastalerz, *J. Org. Chem.* **2020**, *85*, 15256-15272.
- [6] PerkinElmer, *Chem3D Ultra, Version 20.0.0.41*, PerkinElmer Informatics, Inc.
- [7] M. J. M. J. Frisch, G. W. G. W. Trucks, H. B. Schlegel, G. E. Scuseria, M. A. Robb, J. R. Cheeseman, G. Scalmani, V. Barone, B. Mennucci, G. A. Petersson, H. Nakatsuji, M. Caricato, X. Li, H. P. Hratchian, A. F. Izmaylov, J. Bloino, G. Zheng, J. L. Sonnenberg, M. Hada, M. Ehara, K. Toyota, R. Fukuda, J. Hasegawa, M. Ishida, T. Nakajima, Y. Honda, O. Kitao, H. Nakai, T. Vreven, J. Montgomery, J. E. P. J. A., F. Ogliaro, M. Bearpark, J. J. Heyd, E. Brothers, K. N. Kudin, V. N. Staroverov, R. Kobayashi, J. Normand, K. Raghavachari, A. Rendell, J. C. Burant, S. S. Iyengar, J. Tomasi, M. Cossi, N. Rega, N. J. Millam, M. Klene, J. E. Knox, J. B. Cross, V. Bakken, C. Adamo, J. Jaramillo, R. Gomperts, R. E. Stratmann, O. Yazyev, A. J. Austin, R. Cammi, C. Pomelli, J. W. Ochterski, R. L. Martin, K. Morokuma, V. G. Zakrzewski, G. A. Voth, P. Salvador, J. J. Dannenberg, S. Dapprich, A. D. Daniels, Ö. Farkas, J. B. Foresman, J. V. Ortiz, J. Cioslowski, D. J. Fox, Gaussian, Inc., Wallingford CT, **2009**.
- [8] S. F. Nelson, S. C. Blackstock, Y. Kim, *J. Am. Chem. Soc.* **1987**, *109*, 677-682.
- [9] S. F. Nelson, H. Chang, J. J. Wolff, J. J. Adamus, *J. Am. Chem. Soc.* **1993**, *115*, 12276.
- [10] J. H. Klein, T. L. Sunderland, C. Kaufmann, M. Holzapfel, A. Schmiedel, C. Lambert, *Physical Chemistry Chemical Physics* **2013**, *15*, 16024-16030.



- [11] C. Kaiser, A. Schmiedel, M. Holzapfel, C. Lambert, *J. Pys. Chem. C.* **2012**, *116*, 15265-15280.
- [12] C. Würth, M. Grabolle, J. Pauli, M. Spieles, U. Resch-Genger, *Nat. Protoc.* **2013**, *8*, 1535-1550.
- [13] J. K. Hurley, N. Sinai, H. Linschitz, *Photochem. Photobiol.* **1983**, *38*, 9-14.
